# Supplementary material for: Fatty Acid Synthase Is the Key Regulator of Fatty Acid Metabolism and Is Related to Immunotherapy in Bladder Cancer
Source: Front Immunol. 2022 Mar 22;13:836939. doi: 10.3389/fimmu.2022.836939 (PMC8982515; doi:10.3389/fimmu.2022.836939)
Supplement: Supplementary file 4 [file Table_3.xlsx]

## Sheet: dasatibib
BRIEF_TITLE	ATC_CLASSES	DISEASES	DISEASE_SYNONYMS	FINISH_DATE	START_DATE	INTERVENTION	INTERVENTION_SYNONYMS	IS_INTERVENTIONAL	NCT_ID	PHASE	PHASES	COMPOUNDS
Therapy of Chronic Lymphocytic Leukemia With Dasatinib (BMS-354825)	ATC Class - L01X - Other antineoplastic agents in atc	Leukemia, Lymphoma		2012-11-01	2006-08-01	Dasatinib (BMS-354825)	dasatinib, bms-354825, bms-354825 hydrate, bms-354825-03, dasatinib hydrate, dasatinib monohydrate, sprycel	1	NCT00364286	Phase 2	Phase 2	Compound id 501089 - DASATINIB
Dasatinib Combined With Chemotherapy in Relapsed t(8;21) Acute Myeloid Leukemia With KIT D816 Mutation	ATC Class - L01X - Other antineoplastic agents in atc	C-KIT Mutation, Relapsed AML, T(8;21)		2021-12-01	2018-07-01	Dasatinib	dasatinib, bms-354825, bms-354825 hydrate, bms-354825-03, dasatinib hydrate, dasatinib monohydrate, sprycel	1	NCT03560908	Phase 1	Phase 1	Compound id 501089 - DASATINIB
Ph I Dasatinib + Erlotinib in Recurrent MG	ATC Class - L01X - Other antineoplastic agents in atc	Glioblastoma, Gliosarcoma		2010-07-01	2008-01-01	Erlotinib and Dasatinib	erlotinib, osi-774, ro-508231, cp-358,774, cp-358774, cp-35877401, r-1415, rg-1415, tarceva, dasatinib, bms-354825, bms-354825 hydrate, bms-354825-03, dasatinib hydrate, dasatinib monohydrate, sprycel	1	NCT00609999	Phase 1	Phase 1	Compound id 141944 - ERLOTINIB,Compound id 501089 - DASATINIB
Dasatinib in Advanced Non-small Cell Lung Cancer (NSCL) With Ex Vivo and In Vivo Assessment of Tumor Target Modulation	ATC Class - L01X - Other antineoplastic agents in atc	Lung Cancer		2010-07-01	2009-03-01	Dasatinib	dasatinib, bms-354825, bms-354825 hydrate, bms-354825-03, dasatinib hydrate, dasatinib monohydrate, sprycel	1	NCT00858403	Phase 2	Phase 2	Compound id 501089 - DASATINIB
Dasatinib in Advanced Squamous Cell Lung Cancer	ATC Class - L01X - Other antineoplastic agents in atc	Squamous Cell Lung Cancer		2013-05-01	2011-09-01	Dasatinib	dasatinib, bms-354825, bms-354825 hydrate, bms-354825-03, dasatinib hydrate, dasatinib monohydrate, sprycel	1	NCT01491633	Phase 2	Phase 2	Compound id 501089 - DASATINIB
Dasatinib in Treating Patients With Stage III Melanoma That Cannot Be Removed By Surgery or Stage IV Melanoma	ATC Class - L01X - Other antineoplastic agents in atc	Recurrent Melanoma, Stage IIIA Melanoma, Stage IIIB Melanoma, Stage IIIC Melanoma, Stage IV Melanoma		2010-11-01	2006-12-01	dasatinib	dasatinib, bms-354825, bms-354825 hydrate, bms-354825-03, dasatinib hydrate, dasatinib monohydrate, sprycel	1	NCT00436605	Phase 2	Phase 2	Compound id 501089 - DASATINIB
Neoadjuvant Dasatinib Plus LHRH Analogue Therapy in High-Risk Localized Prostate Cancer	ATC Class - L01X - Other antineoplastic agents in atc,ATC Class - L02A - Hormones and related agents	Prostate Cancer		2010-12-01	2009-03-01	Dasatinib, Leuprolide Acetate (LHRH Analogue), Radical Prostatectomy	dasatinib, bms-354825, bms-354825 hydrate, bms-354825-03, dasatinib hydrate, dasatinib monohydrate, sprycel, leuprolide, abbott-43818 free base, ckd-841, leuprorelin, nsc-377526, tap-144 free base, leuprolide acetate, carcinil, lupron depot ped, a-43818, abbott-43818, eligard, eligard kit, fensolvi kit, leuprolide monoacetate, leuprorelin acetate, lupron depot, lupron depot-ped, lupron depot-ped …	1	NCT00860158	Phase 2	Phase 2	Compound id 501089 - DASATINIB,Compound id 1010374 - LEUPROLIDE,Compound id 1013131 - LEUPROLIDE ACETATE
Phase I Trial of Afatinib (BIBW 2992) and Dasatinib in Non-small Cell Lung Cancer (NSCLC)	ATC Class - L01X - Other antineoplastic agents in atc	Lung Cancer, Non-small Cell Lung Cancer (NSCLC)		2019-05-01	2013-12-01	Afatinib - 1A, Afatinib - 1B, Dasatinib - 1A, Dasatinib - 1B	dasatinib, bms-354825, bms-354825 hydrate, bms-354825-03, dasatinib hydrate, dasatinib monohydrate, sprycel, giotrif, afatinib, bibw-2992, bibw2992, gilotrif	1	NCT01999985	Phase 1	Phase 1	Compound id 501089 - DASATINIB,Compound id 576596 - AFATINIB
Dasatinib in Treating Patients With Early Chronic Phase Chronic Myelogenous Leukemia	ATC Class - L01X - Other antineoplastic agents in atc	Chronic Phase Chronic Myelogenous Leukemia, BCR-ABL1 Positive, Philadelphia Chromosome Positive, BCR-ABL1 Positive Chronic Myelogenous Leukemia		2022-11-01	2005-11-01	Dasatinib, Laboratory Biomarker Analysis, Pharmacological Study, Quality-of-Life Assessment, Questionnaire Administration	dasatinib, bms-354825, bms-354825 hydrate, bms-354825-03, dasatinib hydrate, dasatinib monohydrate, sprycel	1	NCT00254423	Phase 2	Phase 2	Compound id 501089 - DASATINIB
Study of Dasatinib (BMS-354825) in Patients With Solid Tumors	ATC Class - L01X - Other antineoplastic agents in atc	Tumors		2008-09-01	2007-01-01	Dasatinib, Dasatinib, Dasatinib	dasatinib, bms-354825, bms-354825 hydrate, bms-354825-03, dasatinib hydrate, dasatinib monohydrate, sprycel	1	NCT00339144	Phase 1	Phase 1	Compound id 501089 - DASATINIB
Dasatinib, Ifosfamide, Carboplatin, and Etoposide in Treating Young Patients With Metastatic or Recurrent Malignant Solid Tumors	ATC Class - L01X - Other antineoplastic agents in atc,ATC Class - L01C - Plant alkaloids and other natural products, antineoplastic drugs,ATC Class - L01A - Alkylating agents,ATC Class - J07B - Viral vaccines	Brain and Central Nervous System Tumors, Childhood Germ Cell Tumor, Extragonadal Germ Cell Tumor, Kidney Cancer, Liver Cancer, Lymphoma, Neuroblastoma, Ovarian Cancer, Sarcoma, Testicular Germ Cell Tumor, Unspecified Childhood Solid Tumor, Protocol Specific		2021-12-01	2008-09-01	carboplatin, dasatinib, etoposide phosphate, ifosfamide, immunohistochemistry staining method, laboratory biomarker analysis, microarray analysis, radiation therapy, therapeutic conventional surgery, western blotting	ifosfamide, ifsofamide, ifex, mitoxana, mjf 9325, mjf-9325, nsc-109724, z-4942, z4942, dasatinib, bms-354825, bms-354825 hydrate, bms-354825-03, dasatinib hydrate, dasatinib monohydrate, sprycel, etoposide, etoposide resolution mixture, nsc-141540, toposar, vp-16-213, vepesid, etoposide phosphate, bmy 40481, bmy-40481, etopophos preservative free, etopophos, vp-16, vp16, carboplatin, paraplatin, …	1	NCT00788125	Phase 1	Phase 1	Compound id 30136 - IFOSFAMIDE,Compound id 501089 - DASATINIB,Compound id 866156 - ETOPOSIDE,Compound id 915791 - ETOPOSIDE PHOSPHATE,Compound id 2702494 - CARBOPLATIN
Dasatinib in Treating Patients With Locally Advanced or Metastatic Mucosal Melanoma, Acral Melanoma, or Vulvovaginal Melanoma That Cannot Be Removed By Surgery	ATC Class - L01X - Other antineoplastic agents in atc	Melanoma (Skin)		2020-12-01	2009-05-01	dasatinib	dasatinib, bms-354825, bms-354825 hydrate, bms-354825-03, dasatinib hydrate, dasatinib monohydrate, sprycel	1	NCT00700882	Phase 2	Phase 2	Compound id 501089 - DASATINIB
Cediranib Maleate With or Without Dasatinib in Patients With HRPC-Resistant to Treatment With Docetaxel	ATC Class - L01X - Other antineoplastic agents in atc	Hormone Refractory Prostate Cancer, Recurrent Prostate Cancer		2014-02-01	2010-10-01	cediranib maleate, dasatinib	dasatinib, bms-354825, bms-354825 hydrate, bms-354825-03, dasatinib hydrate, dasatinib monohydrate, sprycel, cediranib, azd-2171, azd2171, recentin, zd-2171, cediranib maleate, azd-2171 maleate, azd2171 maleate, cediranib maleat	1	NCT01260688	Phase 2	Phase 2	Compound id 501089 - DASATINIB,Compound id 534296 - CEDIRANIB,Compound id 850162 - CEDIRANIB MALEATE
Evaluation of ETC-1907206 With Dasatinib in Advanced Haematologic Malignancies	ATC Class - L01X - Other antineoplastic agents in atc	Chronic Myeloid Leukemia Accelerated Phase (CML-AP, Ph+), Chronic Myeloid Leukemia Blast Crisis (CML-BC, Ph+), Ph+ Acute Lymphoblastic Leukemia (Ph+ALL), Ph- Acute Lymphoblastic Leukemia (Ph-ALL)		2023-02-01	2018-04-01	ETC-1907206, dasatinib	dasatinib, bms-354825, bms-354825 hydrate, bms-354825-03, dasatinib hydrate, dasatinib monohydrate, sprycel	1	NCT03414450	Phase 1	Phase 1	Compound id 501089 - DASATINIB
Combination Chemotherapy and Dasatinib in Treating Patients With Newly Diagnosed Acute Myeloid Leukemia	ATC Class - L01X - Other antineoplastic agents in atc,ATC Class - L01D - Cytotoxic antibiotics and related substances,ATC Class - L01B - Antimetabolites	Acute Myeloid Leukemia, Acute Myeloid Leukemia Arising From Previous Myelodysplastic Syndrome, Adult Acute Myeloid Leukemia With Inv(16)(p13.1q22); CBFB-MYH11, Adult Acute Myeloid Leukemia With t(16;16)(p13.1;q22); CBFB-MYH11, Adult Acute Myeloid Leukemia With t(8;21); (q22; q22.1); RUNX1-RUNX1T1, Core Binding Factor Acute Myeloid Leukemia, Secondary Acute Myeloid Leukemia, Therapy-Related Acute …		null	2010-12-01	Cytarabine, Dasatinib, Daunorubicin Hydrochloride, Laboratory Biomarker Analysis	cytarabine, tarabine pfs, alexan, alexan 100, ara-cytidine, arabinosyl cytosine, cytosar, cytosar-u, depocyte, depocyt, nsc-287459, u-19,920, u-19920, dasatinib, bms-354825, bms-354825 hydrate, bms-354825-03, dasatinib hydrate, dasatinib monohydrate, sprycel, daunorubicin, cerubidine, daunoxome, epirubicin hydrochloride impurity, daunorubicin-, fi 6339, fi-6339, nsc-83142, rp 13057, rp-13057, val…	1	NCT01238211	Phase 2	Phase 2	Compound id 95279 - CYTARABINE,Compound id 501089 - DASATINIB,Compound id 761015 - DAUNORUBICIN,Compound id 798304 - DAUNORUBICIN HYDROCHLORIDE
Dasatinib in Treating Patients With Chronic Lymphocytic Leukemia	ATC Class - L01X - Other antineoplastic agents in atc	Refractory Chronic Lymphocytic Leukemia, Stage I Chronic Lymphocytic Leukemia, Stage II Chronic Lymphocytic Leukemia, Stage III Chronic Lymphocytic Leukemia, Stage IV Chronic Lymphocytic Leukemia		2018-01-01	2011-10-01	Dasatinib, Laboratory Biomarker Analysis, Pharmacological Study	dasatinib, bms-354825, bms-354825 hydrate, bms-354825-03, dasatinib hydrate, dasatinib monohydrate, sprycel	1	NCT01441882	Phase 2	Phase 2	Compound id 501089 - DASATINIB
Senolytic Therapy to Modulate Progression of Alzheimer's Disease	ATC Class - L01X - Other antineoplastic agents in atc,ATC Class - G03C - Estrogens, sex hormones and modulators of the genital system	Alzheimer Disease		2023-08-01	2020-02-01	Dasatinib + Quercetin	dasatinib, bms-354825, bms-354825 hydrate, bms-354825-03, dasatinib hydrate, dasatinib monohydrate, sprycel, quercetin, xanthaurine, meletin, sophoretin, c.i. natural red 1, ldn 0052529, ldn-0052529, nsc 57655, nsc 9219, nsc-57655, nsc-9219	1	NCT04063124	Phase 1	Phase 1	Compound id 501089 - DASATINIB,Compound id 1305802 - QUERCETIN
Dasatinib in Treating Patients With Advanced Lung Cancer That Is No Longer Responding to Erlotinib or Gefitinib	ATC Class - L01X - Other antineoplastic agents in atc	Lung Cancer		2011-09-01	2006-06-01	dasatinib	dasatinib, bms-354825, bms-354825 hydrate, bms-354825-03, dasatinib hydrate, dasatinib monohydrate, sprycel	1	NCT00570401	Phase 2	Phase 2	Compound id 501089 - DASATINIB
A Phase I Study of Oral ABL001 in Patients With CML or Ph+ ALL	ATC Class - L01X - Other antineoplastic agents in atc	Chronic Myelogenous Leukemia, Philadelphia Chromosome-positive Acute Lymphoblastic Leukemia		2024-03-01	2014-04-01	ABL001, ABL001, ABL001 + Nilotinib, ABL001+dasatinib, ABL001+imatinib	asciminib, abl-001, abl001, abl001-nx, nvp-abl001, dasatinib, bms-354825, bms-354825 hydrate, bms-354825-03, dasatinib hydrate, dasatinib monohydrate, sprycel, imatinib, gleevec, sti-571, nilotinib, amn 107, amn-107, amn107, tasigna	1	NCT02081378	Phase 1	Phase 1	Compound id 403250 - ASCIMINIB,Compound id 501089 - DASATINIB,Compound id 713353 - IMATINIB,Compound id 794721 - NILOTINIB
Study of Dasatinib (BMS-354825) in Patients With Advanced Estrogen/Progesterone Receptor-positive (ER+/PR+) or Her2/Neu-positive (Her2/Neu+)Breast Cancer	ATC Class - L01X - Other antineoplastic agents in atc	Breast Cancer, Metastasis		2009-05-01	2006-12-01	Dasatinib, Dasatinib 100 mg	dasatinib, bms-354825, bms-354825 hydrate, bms-354825-03, dasatinib hydrate, dasatinib monohydrate, sprycel	1	NCT00371345	Phase 2	Phase 2	Compound id 501089 - DASATINIB
Phase II Study of 5-FU, Oxaliplatin Plus Dasatinib in Metastatic Pancreatic Adenocarcinoma	ATC Class - L01X - Other antineoplastic agents in atc	Pancreatic Cancer Metastatic		2020-07-01	2012-07-01	Dasatinib, mFOLFOX6	dasatinib, bms-354825, bms-354825 hydrate, bms-354825-03, dasatinib hydrate, dasatinib monohydrate, sprycel	1	NCT01652976	Phase 2	Phase 2	Compound id 501089 - DASATINIB
Phase II Study Evaluating The Safety And Response To Neoadjuvant Dasatinib In Early Stage Non-Small Cell Lung Cancer	ATC Class - L01X - Other antineoplastic agents in atc	Carcinoma, Non-Small-Cell Lung		2009-09-01	2007-11-01	Dasatinib	dasatinib, bms-354825, bms-354825 hydrate, bms-354825-03, dasatinib hydrate, dasatinib monohydrate, sprycel	1	NCT00564876	Phase 2	Phase 2	Compound id 501089 - DASATINIB
Dasatinib in Combination With Zoledronic Acid for the Treatment of Breast Cancer With Bone Metastasis	ATC Class - L01X - Other antineoplastic agents in atc,ATC Class - M05B - Drugs affecting bone structure and mineralization	Bone Metastases, Breast Cancer		2020-11-01	2007-11-01	Dasatinib, Zoledronic Acid	zoledronic acid, zometa, aclasta, ak-156, cgp 42446, cgp-42446, cgp-42446a, reclast, zerlinda, zoledronic acid hydrate, zoledronic acid monohydrate, dasatinib, bms-354825, bms-354825 hydrate, bms-354825-03, dasatinib hydrate, dasatinib monohydrate, sprycel	1	NCT00566618	Phase 1	Phase 1	Compound id 65742 - ZOLEDRONIC ACID,Compound id 501089 - DASATINIB
Study of Dasatinib vs Imatinib in Patients With Chronic Myeloid Leukemia (CML) Who Did Not Have Favorable Response to Imatinib	ATC Class - L01X - Other antineoplastic agents in atc	Chronic Phase Chronic Myeloid Leukemia		2022-02-01	2012-10-01	Dasatinib, Imatinib	dasatinib, bms-354825, bms-354825 hydrate, bms-354825-03, dasatinib hydrate, dasatinib monohydrate, sprycel, imatinib, gleevec, sti-571	1	NCT01593254	Phase 2	Phase 2	Compound id 501089 - DASATINIB,Compound id 713353 - IMATINIB
OPTIM DASATINIB (Optimized Tyrosine Kinase Inhibitors Monotherapy)	ATC Class - L01X - Other antineoplastic agents in atc	Chronic Myelogenous Leukemia, BCR/ABL Positive		2013-12-01	2009-05-01	Dasatinib	dasatinib, bms-354825, bms-354825 hydrate, bms-354825-03, dasatinib hydrate, dasatinib monohydrate, sprycel	1	NCT01916785	Phase 2	Phase 2	Compound id 501089 - DASATINIB
A Study of Dasatinib to See How Liver Impaired and Healthy Subjects Process and React to the Study Drug	ATC Class - L01X - Other antineoplastic agents in atc	Liver Diseases		2007-08-01	2006-10-01	Dasatinib, Dasatinib, Dasatinib	dasatinib, bms-354825, bms-354825 hydrate, bms-354825-03, dasatinib hydrate, dasatinib monohydrate, sprycel	1	NCT00382668	null		Compound id 501089 - DASATINIB
Study of Dasatinib in Patients With Chronic Phase Chronic Myeloid Leukemia and a Suboptimal Response to Imatinib	ATC Class - L01X - Other antineoplastic agents in atc	Leukemia, Myeloid, Chronic		2010-01-01	2006-08-01	Dasatinib, Imatinib	dasatinib, bms-354825, bms-354825 hydrate, bms-354825-03, dasatinib hydrate, dasatinib monohydrate, sprycel, imatinib, gleevec, sti-571	1	NCT00320190	Phase 2	Phase 2	Compound id 501089 - DASATINIB,Compound id 713353 - IMATINIB
Targeting Pro-Inflammatory Cells in Idiopathic Pulmonary Fibrosis: a Human Trial	ATC Class - L01X - Other antineoplastic agents in atc,ATC Class - G03C - Estrogens, sex hormones and modulators of the genital system	Idiopathic Pulmonary Fibrosis (IPF)		2019-06-01	2016-12-01	Dasatinib + Quercetin, Placebo	dasatinib, bms-354825, bms-354825 hydrate, bms-354825-03, dasatinib hydrate, dasatinib monohydrate, sprycel, quercetin, xanthaurine, meletin, sophoretin, c.i. natural red 1, ldn 0052529, ldn-0052529, nsc 57655, nsc 9219, nsc-57655, nsc-9219	1	NCT02874989	Phase 1	Phase 1	Compound id 501089 - DASATINIB,Compound id 1305802 - QUERCETIN
Dasatinib and Ipilimumab in Treating Patients With Gastrointestinal Stromal Tumors or Other Sarcomas That Cannot Be Removed by Surgery or Are Metastatic	ATC Class - L01X - Other antineoplastic agents in atc	Gastrointestinal Stromal Tumor, Stage III Soft Tissue Sarcoma, Stage IV Soft Tissue Sarcoma		2016-06-01	2012-07-01	Dasatinib, Ipilimumab, Laboratory Biomarker Analysis, Pharmacological Study	dasatinib, bms-354825, bms-354825 hydrate, bms-354825-03, dasatinib hydrate, dasatinib monohydrate, sprycel, ipilimumab, bms-734016, mdx-010, mdx-010 mdx-ctla4, mdx-101, mdx-ctla-4, yervoy	1	NCT01643278	Phase 1	Phase 1	Compound id 501089 - DASATINIB,Compound id 2729519 - IPILIMUMAB
Biological Medicine for Diffuse Intrinsic Pontine Glioma (DIPG) Eradication	ATC Class - L01X - Other antineoplastic agents in atc,ATC Class - L04A - Immunosuppressants	Diffuse Intrinsic Pontine Glioma		2018-10-01	2014-10-01	Dasatinib, Erlotinib, Everolimus	erlotinib, osi-774, ro-508231, cp-358,774, cp-358774, cp-35877401, r-1415, rg-1415, tarceva, dasatinib, bms-354825, bms-354825 hydrate, bms-354825-03, dasatinib hydrate, dasatinib monohydrate, sprycel, everolimus, afinitor, afinitor disperz, certican, rad 666, rad-001, rad-666, rad001, sdz-rad, votubia, zortress	1	NCT02233049	Phase 2	Phase 2	Compound id 141944 - ERLOTINIB,Compound id 501089 - DASATINIB,Compound id 1012475 - EVEROLIMUS
Persistence of MR3 in Chronic Myeloid Leukemia (CML) After a 2nd Stop of TKI Treatment	ATC Class - L01X - Other antineoplastic agents in atc	CML, Relapsed		2024-02-01	2018-02-01	Dasatinib	dasatinib, bms-354825, bms-354825 hydrate, bms-354825-03, dasatinib hydrate, dasatinib monohydrate, sprycel	1	NCT03573596	Phase 2	Phase 2	Compound id 501089 - DASATINIB
Serial Measurements of Molecular and Architectural Responses to Therapy (SMMART) PRIME Trial	ATC Class - L01X - Other antineoplastic agents in atc,ATC Class - L04A - Immunosuppressants,ATC Class - S01X - Other ophthalmologicals in atc,ATC Class - L01C - Plant alkaloids and other natural products, antineoplastic drugs,ATC Class - D10A - Anti-acne preparations for topical use,ATC Class - L01D - Cytotoxic antibiotics and related substances,ATC Class - L01B - Antimetabolites,ATC Class - L02B…	Accelerated Phase Chronic Myelogenous Leukemia, BCR-ABL1 Positive, Anatomic Stage IV Breast Cancer AJCC v8, Anemia, Ann Arbor Stage III Hodgkin Lymphoma, Ann Arbor Stage III Non-Hodgkin Lymphoma, Ann Arbor Stage IIIA Hodgkin Lymphoma, Ann Arbor Stage IIIB Hodgkin Lymphoma, Ann Arbor Stage IV Hodgkin Lymphoma, Ann Arbor Stage IV Non-Hodgkin Lymphoma, Ann Arbor Stage IVA Hodgkin Lymphoma, Ann Arbor…		2025-02-01	2020-04-01	Abemaciclib, Abiraterone, Afatinib, Bevacizumab, Bicalutamide, Biospecimen Collection, Bortezomib, Cabazitaxel, Cabozantinib, Capecitabine, Carboplatin, Celecoxib, Cobimetinib, Copanlisib, Dabrafenib, Dacomitinib, Darolutamide, Dasatinib, Doxorubicin, Durvalumab, Enasidenib, Entrectinib, Enzalutamide, Erlotinib, Everolimus, Fluorouracil, Idelalisib, Imatinib, Ipilimumab, Lenvatinib, Leucovorin, L…	fluorouracil, 5-fu, 5-fluorouracil, 5 fu, 5.f.u., accusite, actikerall, adrucil, carac, efudix, efudex, fluoro-uracil roche, fluracil, fluoroplex, nsc-19893, ro 2-9757, ro-2-9757, ro-29757, tolak, darolutamide, bay 1841788, bay-1841788, bay1841788, nubeqa, odm-201, bicalutamide, cosudex, calutide, kalumid, casodex, ici 176,334, ici-176334, ici176,334-1, erlotinib, osi-774, ro-508231, cp-358,774, …	1	NCT03878524	Phase 1	Phase 1	Compound id 23643 - FLUOROURACIL,Compound id 109838 - DAROLUTAMIDE,Compound id 141656 - BICALUTAMIDE,Compound id 141944 - ERLOTINIB,Compound id 154683 - SUNITINIB,Compound id 249536 - LOSARTAN,Compound id 270857 - LENVATINIB,Compound id 295586 - COBIMETINIB,Compound id 356214 - LORLATINIB,Compound id 379664 - IDELALISIB,Compound id 422599 - OLAPARIB,Compound id 428295 - ENZALUTAMIDE,Compound id 4…
Randomized Study Comparing Docetaxel Plus Dasatinib to Docetaxel Plus Placebo in Castration-resistant Prostate Cancer	ATC Class - L01X - Other antineoplastic agents in atc,ATC Class - A07E - Intestinal antiinflammatory agents,ATC Class - H02A - Corticosteroids for systemic use, plain,ATC Class - L01C - Plant alkaloids and other natural products, antineoplastic drugs,ATC Class - V07A - All other non-therapeutic products	Prostatic Neoplasms		2015-07-01	2008-10-01	Dasatinib, Docetaxel, Placebo, Prednisone	dasatinib, bms-354825, bms-354825 hydrate, bms-354825-03, dasatinib hydrate, dasatinib monohydrate, sprycel, docetaxel, bind 014, ckd-810, docefrez, docetaxel anhydrous, docetaxel hydrate, docetaxel trihydrate, nsc-628503, rp 56976, rp-56976, taxceus, taxotere, xrp6976, prednisone, sterapred, cortan, cortancyl, decortisyl, delta-dome, deltasone, fernisone, liquid pred, lodotra, meticorten, nsc-10…	1	NCT00744497	Phase 3	Phase 3	Compound id 501089 - DASATINIB,Compound id 990319 - DOCETAXEL,Compound id 1688535 - PREDNISONE
Frontline Asciminib Combination in Chronic Phase CML	ATC Class - L01X - Other antineoplastic agents in atc	Chronic Myeloid Leukemia		2027-12-01	2019-08-01	Asciminib, Dasatinib, Imatinib, Nilotinib 300 mg	asciminib, abl-001, abl001, abl001-nx, nvp-abl001, dasatinib, bms-354825, bms-354825 hydrate, bms-354825-03, dasatinib hydrate, dasatinib monohydrate, sprycel, imatinib, gleevec, sti-571, nilotinib, amn 107, amn-107, amn107, tasigna	1	NCT03906292	Phase 2	Phase 2	Compound id 403250 - ASCIMINIB,Compound id 501089 - DASATINIB,Compound id 713353 - IMATINIB,Compound id 794721 - NILOTINIB
Low-dose Dasatinib as First-line Treatment for Chronic Myeloid Leukemia	ATC Class - L01X - Other antineoplastic agents in atc	Chronic Myelogenous Leukemia		2018-10-01	2016-04-01	Dasatinib 50 MG	dasatinib, bms-354825, bms-354825 hydrate, bms-354825-03, dasatinib hydrate, dasatinib monohydrate, sprycel	1	NCT03216070	Phase 4	Phase 4	Compound id 501089 - DASATINIB
Safety Study Of Cetuximab Plus Dasatinib (BMS-354825) in Treating Advanced Solid Malignancies	ATC Class - L01X - Other antineoplastic agents in atc	Malignant Solid Tumour		2013-02-01	2007-06-01	Cetuximab (Erbitux, C225), Dasatinib (BMS-354825)	dasatinib, bms-354825, bms-354825 hydrate, bms-354825-03, dasatinib hydrate, dasatinib monohydrate, sprycel, cetuximab, abp-494, c-225, c225, cetuximab (genetical recombination), cmab-009, cmab009, erbitux, imc-225, imc-c225, moab c225	1	NCT00388427	Phase 1	Phase 1	Compound id 501089 - DASATINIB,Compound id 2689082 - CETUXIMAB
Genomic Guided Therapy With Dasatinib or Nilutamide in Metastatic Castration-Resistant Prostate Cancer	ATC Class - L01X - Other antineoplastic agents in atc,ATC Class - L02B - Hormone antagonists and related agents	Prostate Cancer		2013-08-01	2009-05-01	Dasatinib, Nilutamide	dasatinib, bms-354825, bms-354825 hydrate, bms-354825-03, dasatinib hydrate, dasatinib monohydrate, sprycel, nilutamide, anadron, nilandron, ru 23908, ru-23908	1	NCT00918385	Phase 2	Phase 2	Compound id 501089 - DASATINIB,Compound id 1335920 - NILUTAMIDE
A Phase I/II Study of Dasatinib and Dacarbazine	ATC Class - L01X - Other antineoplastic agents in atc,ATC Class - L01A - Alkylating agents	Metastatic Melanoma		2011-09-01	2007-11-01	Dasatinib and Dacarbazine (DTIC)	dacarbazine, dtic, dtic-dome, nci c04717, nsc-45388, dasatinib, bms-354825, bms-354825 hydrate, bms-354825-03, dasatinib hydrate, dasatinib monohydrate, sprycel	1	NCT00597038	Phase 1	Phase 1	Compound id 15245 - DACARBAZINE,Compound id 501089 - DASATINIB
Insulin-like Growth Factor 1 Receptor (IGF-1R) Antibody AMG479 (Ganitumab) in Combination With the Src Family Kinase (SFK) Inhibitor Dasatinib in People With Embryonal and Alveolar Rhabdomyosarcoma	ATC Class - L01X - Other antineoplastic agents in atc	Rhabdomyosarcoma, Rhabdomyosarcoma, Alveolar, Rhabdomyosarcoma, Embryonal		2022-10-01	2017-07-01	Dasatinib, Ganitumab	dasatinib, bms-354825, bms-354825 hydrate, bms-354825-03, dasatinib hydrate, dasatinib monohydrate, sprycel, ganitumab, amg 479, amg-479, amg479	1	NCT03041701	Phase 1	Phase 1	Compound id 501089 - DASATINIB,Compound id 2728626 - GANITUMAB
ALSENLITE: Senolytics for Alzheimer's Disease	ATC Class - L01X - Other antineoplastic agents in atc,ATC Class - G03C - Estrogens, sex hormones and modulators of the genital system	Alzheimer Disease, Mild Cognitive Impairment		2023-06-01	2021-10-01	Dasatinib, Quercetin	dasatinib, bms-354825, bms-354825 hydrate, bms-354825-03, dasatinib hydrate, dasatinib monohydrate, sprycel, quercetin, xanthaurine, meletin, sophoretin, c.i. natural red 1, ldn 0052529, ldn-0052529, nsc 57655, nsc 9219, nsc-57655, nsc-9219	1	NCT04785300	Phase 1	Phase 1	Compound id 501089 - DASATINIB,Compound id 1305802 - QUERCETIN
Effectiveness of Dasatinib in Adult Patients With Chronic Myeloid Leukemia in China: A Multicenter, Registry Study	ATC Class - L01X - Other antineoplastic agents in atc	Leukemia, Myelogenous, Chronic, BCR-ABL Positive		2017-07-01	2013-04-01	Dasatinib	dasatinib, bms-354825, bms-354825 hydrate, bms-354825-03, dasatinib hydrate, dasatinib monohydrate, sprycel	1	NCT02389972	null		Compound id 501089 - DASATINIB
Dasatinib in Imatinib Resistant/Intolerant Chinese CML (Chronic and Advanced Phase) Subjects	ATC Class - L01X - Other antineoplastic agents in atc	Leukemia		2022-10-01	2007-11-01	Dasatinib	dasatinib, bms-354825, bms-354825 hydrate, bms-354825-03, dasatinib hydrate, dasatinib monohydrate, sprycel	1	NCT00529763	Phase 2	Phase 2	Compound id 501089 - DASATINIB
A Study of Oral Asciminib Versus Other TKIs in Adult Patients With Newly Diagnosed Ph+ CML-CP	ATC Class - L01X - Other antineoplastic agents in atc	Chronic Myeloid Leukemia (CML) Philadelphia Chromosome Positive		2028-11-01	2021-10-01	Asciminib, Bosutinib, Dasatinib, Imatinib, Nilotinib	asciminib, abl-001, abl001, abl001-nx, nvp-abl001, dasatinib, bms-354825, bms-354825 hydrate, bms-354825-03, dasatinib hydrate, dasatinib monohydrate, sprycel, bosutinib, bosulif, bosutinib monohydrate, sk-606, ski-606, imatinib, gleevec, sti-571, nilotinib, amn 107, amn-107, amn107, tasigna	1	NCT04971226	Phase 3	Phase 3	Compound id 403250 - ASCIMINIB,Compound id 501089 - DASATINIB,Compound id 679371 - BOSUTINIB,Compound id 713353 - IMATINIB,Compound id 794721 - NILOTINIB
Dasatinib in Combination With Melphalan and Prednisone to Treat Relapsed and Refractory Multiple Myeloma Patients	ATC Class - L01X - Other antineoplastic agents in atc,ATC Class - V03A - All other therapeutic products,ATC Class - A07E - Intestinal antiinflammatory agents,ATC Class - H02A - Corticosteroids for systemic use, plain,ATC Class - L01A - Alkylating agents,ATC Class - V07A - All other non-therapeutic products	Myeloma		2011-05-01	2008-02-01	dasatinib, melphalan, prednisone	dasatinib, bms-354825, bms-354825 hydrate, bms-354825-03, dasatinib hydrate, dasatinib monohydrate, sprycel, melphalan, alanine nitrogen mustard, alkeran, aikeran, cb 3025, cb-3025, l-sarcolysin, melfalan, nci-c04853, nsc-241286, nsc-8806, phenylalanine mustard, sk 15673, sk-15673, prednisone, sterapred, cortan, cortancyl, decortisyl, delta-dome, deltasone, fernisone, liquid pred, lodotra, metico…	1	NCT01116128	Phase 2	Phase 2	Compound id 501089 - DASATINIB,Compound id 1114002 - MELPHALAN,Compound id 1688535 - PREDNISONE
A Study of Complete Molecular Response for Chronic Myeloid Leukemia in Chronic Phase Patients, Treated With Dasatinib	ATC Class - L01X - Other antineoplastic agents in atc	Chronic Myeloid Leukemia		2014-09-01	2011-04-01	dasatinib	dasatinib, bms-354825, bms-354825 hydrate, bms-354825-03, dasatinib hydrate, dasatinib monohydrate, sprycel	1	NCT01342679	Phase 2	Phase 2	Compound id 501089 - DASATINIB
Phase 2 Dasatinib Combo With Smoothened (SMO) Antagonist (BMS-833923)	ATC Class - L01X - Other antineoplastic agents in atc	Leukemia		2016-01-01	2011-09-01	BMS-833923, Dasatinib	dasatinib, bms-354825, bms-354825 hydrate, bms-354825-03, dasatinib hydrate, dasatinib monohydrate, sprycel, bms-833923, bms-833923 dimesylate monohydrate, xl-139, xl139	1	NCT01357655	Phase 2	Phase 2	Compound id 501089 - DASATINIB,Compound id 745841 - BMS-833923
Study of Dasatinib and Bendamustine in Chronic Lymphocytic Leukemia	ATC Class - L01X - Other antineoplastic agents in atc,ATC Class - L01A - Alkylating agents	Chronic Lymphocytic Leukemia		2011-12-01	2009-05-01	Combination of Bendamustine + Dasatinib, Combination of Bendamustine + Dasatinib, Dasatinib, Dasatinib	dasatinib, bms-354825, bms-354825 hydrate, bms-354825-03, dasatinib hydrate, dasatinib monohydrate, sprycel, bendamustine	1	NCT00872976	Phase 1	Phase 1	Compound id 501089 - DASATINIB,Compound id 1410893 - BENDAMUSTINE
A Randomized Phase II Trial Comparing Therapy Based on Tumor Molecular Profiling Versus Conventional Therapy in Patients With Refractory Cancer	ATC Class - L02B - Hormone antagonists and related agents,ATC Class - L01X - Other antineoplastic agents in atc,ATC Class - L04A - Immunosuppressants	Reccurent/Metastatic Solid Tumor Disease		2016-12-01	2012-10-01	Standard Chemotherapy, Targeted therapy based on molecular profiling : Abiraterone, Targeted therapy based on molecular profiling : Dasatinib, Targeted therapy based on molecular profiling : Erlotinib, Targeted therapy based on molecular profiling : Everolimus, Targeted therapy based on molecular profiling : Imatinib, Targeted therapy based on molecular profiling : Lapatinib + Trastuzumab, Target…	erlotinib, osi-774, ro-508231, cp-358,774, cp-358774, cp-35877401, r-1415, rg-1415, tarceva, sorafenib, bay 43-9006, bay-43-9006, nexavar, dasatinib, bms-354825, bms-354825 hydrate, bms-354825-03, dasatinib hydrate, dasatinib monohydrate, sprycel, vemurafenib, plx-4032, plx4032, rg 7204, rg-7204, ro 5185426, ro-51-85426, ro-5185426, zelboraf, imatinib, gleevec, sti-571, lapatinib, gw-2016, gsk-57…	1	NCT01771458	Phase 2	Phase 2	Compound id 141944 - ERLOTINIB,Compound id 429624 - SORAFENIB,Compound id 501089 - DASATINIB,Compound id 505877 - VEMURAFENIB,Compound id 713353 - IMATINIB,Compound id 810723 - LAPATINIB,Compound id 1012475 - EVEROLIMUS,Compound id 1321721 - LETROZOLE,Compound id 1722972 - ABIRATERONE,Compound id 1899733 - TAMOXIFEN,Compound id 2689090 - TRASTUZUMAB
Dasatinib in Polycythemia Vera	ATC Class - L01X - Other antineoplastic agents in atc	Polycythemia Vera		2010-08-01	2007-04-01	Dasatinib	dasatinib, bms-354825, bms-354825 hydrate, bms-354825-03, dasatinib hydrate, dasatinib monohydrate, sprycel	1	NCT00538980	Phase 2	Phase 2	Compound id 501089 - DASATINIB
Trial of Dasatinib in Advanced Sarcomas	ATC Class - L01X - Other antineoplastic agents in atc	Chondrosarcoma, Chordoma, Epithelioid Sarcoma, Gastrointestinal Stromal Tumor (GIST), Giant Cell Tumor of Bone, Hemangiopericytoma, Malignant Peripheral Nerve Sheath Tumors, Rhabdomyosarcoma, Sarcoma, Alveolar Soft Part, Sarcoma, Ewing's		2017-05-01	2007-05-01	Dasatinib	dasatinib, bms-354825, bms-354825 hydrate, bms-354825-03, dasatinib hydrate, dasatinib monohydrate, sprycel	1	NCT00464620	Phase 2	Phase 2	Compound id 501089 - DASATINIB
Study of BMS-354825 (Dasatinib) in Patients With Chronic Myeloid Leukemia Who Are Either Resistant or Intolerant to Imatinib	ATC Class - L01X - Other antineoplastic agents in atc	Chronic Myeloid Leukemia, Philadelphia-Positive Myeloid Leukemia		2008-04-01	2005-02-01	Dasatinib	dasatinib, bms-354825, bms-354825 hydrate, bms-354825-03, dasatinib hydrate, dasatinib monohydrate, sprycel	1	NCT00101660	Phase 2	Phase 2	Compound id 501089 - DASATINIB
BMS-354825 in Treating Patients With Chronic Phase Chronic Myelogenous Leukemia That Is Resistant to Imatinib Mesylate	ATC Class - L01X - Other antineoplastic agents in atc	Leukemia		2006-10-01	2003-11-01	dasatinib	dasatinib, bms-354825, bms-354825 hydrate, bms-354825-03, dasatinib hydrate, dasatinib monohydrate, sprycel	1	NCT00064233	Phase 1	Phase 1	Compound id 501089 - DASATINIB
Dasatinib (Sprycelâ¢) in Patients With Newly Diagnosed Core Binding Factor (CBF) Acute Myeloid Leukemia (AML)	ATC Class - L01X - Other antineoplastic agents in atc,ATC Class - L01D - Cytotoxic antibiotics and related substances,ATC Class - L01B - Antimetabolites	Acute Myeloid Leukemia (AML)		2015-11-01	2009-06-01	Cytarabine, Dasatinib, daunorubicin	cytarabine, tarabine pfs, alexan, alexan 100, ara-cytidine, arabinosyl cytosine, cytosar, cytosar-u, depocyte, depocyt, nsc-287459, u-19,920, u-19920, dasatinib, bms-354825, bms-354825 hydrate, bms-354825-03, dasatinib hydrate, dasatinib monohydrate, sprycel, daunorubicin, cerubidine, daunoxome, epirubicin hydrochloride impurity, daunorubicin-, fi 6339, fi-6339, nsc-83142, rp 13057, rp-13057, val…	1	NCT00850382	Phase 1	Phase 1	Compound id 95279 - CYTARABINE,Compound id 501089 - DASATINIB,Compound id 761015 - DAUNORUBICIN
S0622, Dasatinib in Treating Patients With Stage IV Breast Cancer That Has Spread to the Bone	ATC Class - L01X - Other antineoplastic agents in atc	Breast Cancer, Metastatic Cancer		2014-01-01	2007-03-01	dasatinib	dasatinib, bms-354825, bms-354825 hydrate, bms-354825-03, dasatinib hydrate, dasatinib monohydrate, sprycel	1	NCT00410813	Phase 2	Phase 2	Compound id 501089 - DASATINIB
A Study of Dasatinib in Patients With Chronic Myelogenous Leukemia Who Are Resistant or Intolerant of Imatinib Mesylate	ATC Class - L01X - Other antineoplastic agents in atc	Leukemia, Lymphocytic, Acute, L2, Leukemia, Myeloid, Chronic		2007-06-01	2006-02-01	Dasatinib	dasatinib, bms-354825, bms-354825 hydrate, bms-354825-03, dasatinib hydrate, dasatinib monohydrate, sprycel	1	NCT00298987	Phase 2	Phase 2	Compound id 501089 - DASATINIB
Phase II Study of Dasatinib in Previously Treated Patients With Advanced NSCLC	ATC Class - L01X - Other antineoplastic agents in atc	Non Small Cell Lung Cancer		2013-06-01	2008-09-01	Dasatinib	dasatinib, bms-354825, bms-354825 hydrate, bms-354825-03, dasatinib hydrate, dasatinib monohydrate, sprycel	1	NCT00787267	Phase 2	Phase 2	Compound id 501089 - DASATINIB
Combination Chemotherapy in Treating Young Patients With Newly Diagnosed High-Risk B Acute Lymphoblastic Leukemia and Ph-Like TKI Sensitive Mutations	ATC Class - R01A - Decongestants and other nasal preparations for topical use,ATC Class - A01A - Stomatological preparations,ATC Class - S01B - Antiinflammatory agents, ophthalmologic,ATC Class - S03B - Corticosteroid ophthalmologic and otologic preparations,ATC Class - D07A - Corticosteroid dermatological preparations, plain,ATC Class - D10A - Anti-acne preparations for topical use,ATC Class - C…	B Acute Lymphoblastic Leukemia, Central Nervous System Leukemia, Ph-Like Acute Lymphoblastic Leukemia, Testicular Leukemia		null	2012-02-01	Clofarabine, Cyclophosphamide, Cytarabine, Dasatinib, Daunorubicin Hydrochloride, Dexamethasone, Doxorubicin Hydrochloride, Etoposide, Hydrocortisone Sodium Succinate, Laboratory Biomarker Analysis, Leucovorin Calcium, Mercaptopurine, Methotrexate, Pegaspargase, Prednisone, Radiation Therapy, Thioguanine, Vincristine Sulfate	mercaptopurine, 6-mercaptopurine, 6-mercaptopurine monohydrate, mercaptopurine anhydrous, mercaptopurine hydrate, nsc-755, puri-nethol, purixan, purinethol, xaluprine, cyclophosphamide, b-518, cyclophosphamide anhydrous, cyclophosphamide hydrate, cyclophosphamide monohydrate, cytoxan (lyophilized), cytoxan, endoxana, lyophilized cytoxan, neosar, nsc-26271, thioguanine, tabloid, lanvis, nsc-752, n…	1	NCT02883049	Phase 3	Phase 3	Compound id 3227 - MERCAPTOPURINE,Compound id 51794 - CYCLOPHOSPHAMIDE,Compound id 78895 - THIOGUANINE,Compound id 95279 - CYTARABINE,Compound id 490791 - METHOTREXATE,Compound id 501089 - DASATINIB,Compound id 1903831 - DEXAMETHASONE,Compound id 570936 - LEUCOVORIN,Compound id 577237 - HYDROCORTISONE SODIUM SUCCINATE,Compound id 632578 - LEUCOVORIN CALCIUM,Compound id 761015 - DAUNORUBICIN,Compo…
Dasatinib (BMS-354835) Versus Imatinib Mesylate in Subjects With Chronic Myeloid Leukemia	ATC Class - L01X - Other antineoplastic agents in atc	Chronic Myeloid Leukemia, Philadelphia-Positive Myeloid Leukemia		2008-03-01	2005-02-01	Dasatinib, Imatinib	dasatinib, bms-354825, bms-354825 hydrate, bms-354825-03, dasatinib hydrate, dasatinib monohydrate, sprycel, imatinib, gleevec, sti-571	1	NCT00103844	Phase 2	Phase 2	Compound id 501089 - DASATINIB,Compound id 713353 - IMATINIB
Dasatinib or Nilotinib Followed by Imatinib in Patients With Newly Diagnosed, Chronic Phase Chronic Myeloid Leukemia	ATC Class - L01X - Other antineoplastic agents in atc	Chronic Myelogenous Leukemia, Chronic Myeloid Leukemia, Leukemia		2018-07-01	2016-10-01	Dasatinib, Imatinib Mesylate, Nilotinib	dasatinib, bms-354825, bms-354825 hydrate, bms-354825-03, dasatinib hydrate, dasatinib monohydrate, sprycel, imatinib, gleevec, sti-571, nilotinib, amn 107, amn-107, amn107, tasigna, imatinib mesilate, imatinib mesylate, glivec, imatinib methanesulfonate, qti-571, qti571, sti 571, sti571	1	NCT02709083	Phase 2	Phase 2	Compound id 501089 - DASATINIB,Compound id 713353 - IMATINIB,Compound id 794721 - NILOTINIB,Compound id 864374 - IMATINIB MESYLATE
Total Therapy Study XVI for Newly Diagnosed Patients With Acute Lymphoblastic Leukemia	ATC Class - R01A - Decongestants and other nasal preparations for topical use,ATC Class - A01A - Stomatological preparations,ATC Class - S01B - Antiinflammatory agents, ophthalmologic,ATC Class - S03B - Corticosteroid ophthalmologic and otologic preparations,ATC Class - D07A - Corticosteroid dermatological preparations, plain,ATC Class - D10A - Anti-acne preparations for topical use,ATC Class - C…	Acute Lymphoblastic Leukemia		2022-03-01	2007-10-01	Clofarabine, Methotrexate, Mercaptopurine, Dexamethasone, Etoposide, Dasatinib, Prednisone, Vincristine, Daunorubicin, PEG-L-asparaginase, Erwinia L-asparaginase, Doxorubicin, Cyclophosphamide, Cytarabine, Thioguanine	mercaptopurine, 6-mercaptopurine, 6-mercaptopurine monohydrate, mercaptopurine anhydrous, mercaptopurine hydrate, nsc-755, puri-nethol, purixan, purinethol, xaluprine, cyclophosphamide, b-518, cyclophosphamide anhydrous, cyclophosphamide hydrate, cyclophosphamide monohydrate, cytoxan (lyophilized), cytoxan, endoxana, lyophilized cytoxan, neosar, nsc-26271, thioguanine, tabloid, lanvis, nsc-752, n…	1	NCT00549848	Phase 3	Phase 3	Compound id 3227 - MERCAPTOPURINE,Compound id 51794 - CYCLOPHOSPHAMIDE,Compound id 78895 - THIOGUANINE,Compound id 95279 - CYTARABINE,Compound id 490791 - METHOTREXATE,Compound id 501089 - DASATINIB,Compound id 1903831 - DEXAMETHASONE,Compound id 761015 - DAUNORUBICIN,Compound id 791569 - DOXORUBICIN,Compound id 866156 - ETOPOSIDE,Compound id 986271 - VINCRISTINE,Compound id 1181061 - CLOFARABINE…
Precision Dosing of Tyrosine Kinase Inhibitors in CML Patients	ATC Class - L01X - Other antineoplastic agents in atc	CML (Chronic Myelogenous Leukemia, CML - Philadelphia Chromosome, CML, Chronic Phase, Chronic Myeloid Leukemia, Chronic Myeloid Leukemia, Chronic Phase		2022-09-01	2019-06-01	Bosutinib, Dasatinib, Imatinib, Nilotinib	dasatinib, bms-354825, bms-354825 hydrate, bms-354825-03, dasatinib hydrate, dasatinib monohydrate, sprycel, bosutinib, bosulif, bosutinib monohydrate, sk-606, ski-606, imatinib, gleevec, sti-571, nilotinib, amn 107, amn-107, amn107, tasigna	1	NCT03885830	null		Compound id 501089 - DASATINIB,Compound id 679371 - BOSUTINIB,Compound id 713353 - IMATINIB,Compound id 794721 - NILOTINIB
Gemcitabine and Dasatinib in Advanced Solid Tumors	ATC Class - L01X - Other antineoplastic agents in atc,ATC Class - L01B - Antimetabolites	Advanced Cancer, Solid Tumors		2013-02-01	2007-01-01	Dasatinib, Gemcitabine	dasatinib, bms-354825, bms-354825 hydrate, bms-354825-03, dasatinib hydrate, dasatinib monohydrate, sprycel, gemcitabine, gemzar, ly-188011, ly188011, nsc-613327	1	NCT00429234	Phase 1	Phase 1	Compound id 501089 - DASATINIB,Compound id 1072154 - GEMCITABINE
Study of Dasatinib in Patients With Advanced Solid Tumors	ATC Class - J02A - Antimycotics for systemic use,ATC Class - D01A - Antifungals for topical use,ATC Class - G01A - Antiinfectives and antiseptics, excl. combinations with corticosteroids,ATC Class - L01X - Other antineoplastic agents in atc	Tumors		2007-03-01	2005-08-01	Dasatinib + Ketoconazole	dasatinib, bms-354825, bms-354825 hydrate, bms-354825-03, dasatinib hydrate, dasatinib monohydrate, sprycel, ketoconazole, panfungol, ketosidin, daktarin gold, daktarin intensiv, dandrazol, dandrid, extina, j02ab02, ketopine, ketozole, nizoral a-d, nizoral anti-dandruff, nizorelle, nsc-317629, nizoral, r 41,400, r-41400, xolegel	1	NCT00162214	Phase 1	Phase 1	Compound id 501089 - DASATINIB,Compound id 675098 - KETOCONAZOLE
Continuing Treatment for Subjects Who Have Participated on a Prior Protocol Investigating Dasatinib	ATC Class - L01X - Other antineoplastic agents in atc	Multiple Indications Cancer		2022-01-01	2015-07-01	Dasatinib	dasatinib, bms-354825, bms-354825 hydrate, bms-354825-03, dasatinib hydrate, dasatinib monohydrate, sprycel	1	NCT02297139	Phase 2	Phase 2	Compound id 501089 - DASATINIB
Safety and Effectivness of Quercetin & Dasatinib on Epigenetic Aging	ATC Class - L01X - Other antineoplastic agents in atc,ATC Class - G03C - Estrogens, sex hormones and modulators of the genital system	Aging		2022-06-01	2020-12-01	Dasatinib plus Quercetin	dasatinib, bms-354825, bms-354825 hydrate, bms-354825-03, dasatinib hydrate, dasatinib monohydrate, sprycel, quercetin, xanthaurine, meletin, sophoretin, c.i. natural red 1, ldn 0052529, ldn-0052529, nsc 57655, nsc 9219, nsc-57655, nsc-9219	1	NCT04946383	Phase 2	Phase 2	Compound id 501089 - DASATINIB,Compound id 1305802 - QUERCETIN
Study of Dasatinib in Children and Adolescents With Relapsed or Refractory Leukemia	ATC Class - L01X - Other antineoplastic agents in atc	Leukemia		2019-05-01	2006-03-01	Dasatinib, Dasatinib, Dasatinib	dasatinib, bms-354825, bms-354825 hydrate, bms-354825-03, dasatinib hydrate, dasatinib monohydrate, sprycel	1	NCT00306202	Phase 1	Phase 1	Compound id 501089 - DASATINIB
Study of CCNU (Lomustine) Plus Dasatinib in Recurrent Glioblastoma (GBM)	ATC Class - L01X - Other antineoplastic agents in atc,ATC Class - L01A - Alkylating agents	Glioblastoma		2011-05-01	2009-10-01	Dasatinib, Lomustine	lomustine, ccnu, ccn-u, ceenu, gleostine, nsc-79037, dasatinib, bms-354825, bms-354825 hydrate, bms-354825-03, dasatinib hydrate, dasatinib monohydrate, sprycel	1	NCT00948389	Phase 1	Phase 1	Compound id 47440 - LOMUSTINE,Compound id 501089 - DASATINIB
A Study to Evaluate the Safety and Efficacy of Dasatinib (Sprycel) in Subjects With Relapsed or Refractory Diffuse Large B-Cell Lymphoma (DLBCL)	ATC Class - L01X - Other antineoplastic agents in atc	Diffuse Large B-cell Lymphoma		2011-05-01	2009-06-01	dasatinib	dasatinib, bms-354825, bms-354825 hydrate, bms-354825-03, dasatinib hydrate, dasatinib monohydrate, sprycel	1	NCT00918463	Phase 2	Phase 2	Compound id 501089 - DASATINIB
Pediatric Precision Laboratory Advanced Neuroblastoma Therapy	ATC Class - L01X - Other antineoplastic agents in atc,ATC Class - D11A - Other dermatological preparations in atc,ATC Class - P01C - Agents against leishmaniasis and trypanosomiasis	Neuroblastoma		2032-09-01	2015-09-01	Ceritinib, DFMO, dasatinib, sorafenib, vorinostat	eflornithine hydrochloride, mdl-71782a, dfmo hcl, difluromethylornithine, eflornithine hydrochloride monohydrate, mdl 71,782 a, mdl-71782-a, nsc-270295, nsc-337250, ornidyl, rmi-71782-a, vaniqa, dfmo, sorafenib, bay 43-9006, bay-43-9006, nexavar, dasatinib, bms-354825, bms-354825 hydrate, bms-354825-03, dasatinib hydrate, dasatinib monohydrate, sprycel, ceritinib, ldk-378, ldk378, nvp-ldk-378-nx,…	1	NCT02559778	Phase 2	Phase 2	Compound id 33262 - EFLORNITHINE HYDROCHLORIDE,Compound id 429624 - SORAFENIB,Compound id 501089 - DASATINIB,Compound id 776071 - CERITINIB,Compound id 1113023 - VORINOSTAT
Dasatinib in Combination With Chemotherapy for Relapsed or Refractory Core Binding Factor Acute Myeloid Leukemia	ATC Class - L01X - Other antineoplastic agents in atc,ATC Class - L01B - Antimetabolites,ATC Class - L01D - Cytotoxic antibiotics and related substances	Acute Myeloid Leukemia		2017-12-01	2015-12-01	Cytarabine, Dasatinib, Fludarabine, Idarubicin, Intrathecal (IT) cytarabine	cytarabine, tarabine pfs, alexan, alexan 100, ara-cytidine, arabinosyl cytosine, cytosar, cytosar-u, depocyte, depocyt, nsc-287459, u-19,920, u-19920, dasatinib, bms-354825, bms-354825 hydrate, bms-354825-03, dasatinib hydrate, dasatinib monohydrate, sprycel, idarubicin, idamycin, fludarabine, 2-fluoro-ara-a, fludarabine phosphate impurity, 2-fluoro-ara-adenine-, nsc-118218, nsc-118218h	1	NCT02680951	Phase 1	Phase 1	Compound id 95279 - CYTARABINE,Compound id 501089 - DASATINIB,Compound id 680120 - IDARUBICIN,Compound id 1179124 - FLUDARABINE
Dasatinib and Osimertinib (AZD9291) in Advanced Non-Small Cell Lung Cancer With EGFR Mutations	ATC Class - L01X - Other antineoplastic agents in atc	EGFR Gene Mutation, Nonsmall Cell Lung Cancer		2021-11-01	2016-10-01	Dasatinib, Osimertinib	dasatinib, bms-354825, bms-354825 hydrate, bms-354825-03, dasatinib hydrate, dasatinib monohydrate, sprycel, osimertinib, azd-9291, azd-9291 free base, azd9291, tagrisso	1	NCT02954523	Phase 1	Phase 1	Compound id 501089 - DASATINIB,Compound id 728282 - OSIMERTINIB
Open-Label Study Evaluating Dasatinib Therapy Discontinuation in Patients With Chronic Phase Chronic Myeloid Leukemia With Stable Complete Molecular Response	ATC Class - L01X - Other antineoplastic agents in atc	Chronic Phase Chronic Myeloid Leukemia		2021-10-01	2013-10-01	Dasatinib	dasatinib, bms-354825, bms-354825 hydrate, bms-354825-03, dasatinib hydrate, dasatinib monohydrate, sprycel	1	NCT01850004	Phase 2	Phase 2	Compound id 501089 - DASATINIB
KISS Study: Kinase Inhibition With Sprycel Start up	ATC Class - L01X - Other antineoplastic agents in atc	Chronic Myeloid Leukemia		2025-12-01	2017-07-01	Dasatinib, Imatinib	dasatinib, bms-354825, bms-354825 hydrate, bms-354825-03, dasatinib hydrate, dasatinib monohydrate, sprycel, imatinib, gleevec, sti-571	1	NCT03193281	Phase 2	Phase 2	Compound id 501089 - DASATINIB,Compound id 713353 - IMATINIB
Dasatinib in Treating Patients With Unresectable or Metastatic Squamous Cell Skin Cancer or RAI Stage 0-I Chronic Lymphocytic Leukemia	ATC Class - L01X - Other antineoplastic agents in atc	Recurrent Skin Cancer, Squamous Cell Carcinoma of the Skin, Stage 0 Chronic Lymphocytic Leukemia, Stage I Chronic Lymphocytic Leukemia		2014-10-01	2007-11-01	dasatinib, laboratory biomarker analysis	dasatinib, bms-354825, bms-354825 hydrate, bms-354825-03, dasatinib hydrate, dasatinib monohydrate, sprycel	1	NCT00563290	Phase 2	Phase 2	Compound id 501089 - DASATINIB
Dasatinib, Paclitaxel, and Carboplatin in Treating Patients With Stage III-IV or Recurrent Endometrial Cancer	ATC Class - L01X - Other antineoplastic agents in atc,ATC Class - L01C - Plant alkaloids and other natural products, antineoplastic drugs	Endometrial Adenocarcinoma, Endometrial Clear Cell Adenocarcinoma, Endometrial Mucinous Adenocarcinoma, Endometrial Serous Adenocarcinoma, Endometrial Squamous Cell Carcinoma, Endometrial Transitional Cell Carcinoma, Endometrial Undifferentiated Carcinoma, Endometrioid Adenocarcinoma, Recurrent Uterine Corpus Carcinoma, Stage III Uterine Corpus Cancer AJCC v7, Stage IIIA Uterine Corpus Cancer AJC…		2015-12-01	2011-09-01	Carboplatin, Dasatinib, Laboratory Biomarker Analysis, Paclitaxel	dasatinib, bms-354825, bms-354825 hydrate, bms-354825-03, dasatinib hydrate, dasatinib monohydrate, sprycel, paclitaxel, abi-007, abi-007 component paclitaxel, abraxane, bms 181339-01, bms-181339-01, dhp 107, dhp-107, mbt 0206, mbt-0206, nk 105, nk-105, nsc-125973, pacitaxel, paxene, qw-8184, taxol, taxol 100, carboplatin, paraplatin, carboplatine, jm-8, nsc-201345, nsc-241240	1	NCT01440998	Phase 1	Phase 1	Compound id 501089 - DASATINIB,Compound id 991478 - PACLITAXEL,Compound id 2702494 - CARBOPLATIN
Dasatinib, Temsirolimus, and Cyclophosphamide in Treating Patients With Advanced, Recurrent, or Refractory Solid Tumors	ATC Class - L01X - Other antineoplastic agents in atc,ATC Class - L01A - Alkylating agents	Advanced Malignant Solid Neoplasm, Recurrent Brain Neoplasm, Recurrent Malignant Solid Neoplasm, Refractory Brain Neoplasm		2021-10-01	2015-10-01	Cyclophosphamide, Dasatinib, Laboratory Biomarker Analysis, Temsirolimus	cyclophosphamide, b-518, cyclophosphamide anhydrous, cyclophosphamide hydrate, cyclophosphamide monohydrate, cytoxan (lyophilized), cytoxan, endoxana, lyophilized cytoxan, neosar, nsc-26271, dasatinib, bms-354825, bms-354825 hydrate, bms-354825-03, dasatinib hydrate, dasatinib monohydrate, sprycel, temsirolimus, cci-779, torisel	1	NCT02389309	Phase 1	Phase 1	Compound id 51794 - CYCLOPHOSPHAMIDE,Compound id 501089 - DASATINIB,Compound id 1039526 - TEMSIROLIMUS
The Efficacy and Safety of Switching to Flumatinib Versus Dasatinib After Imatinib-related Low-grade Adverse Events in CML-CP Patients	ATC Class - L01X - Other antineoplastic agents in atc	Chronic Myeloid Leukemia in Chronic Phase		2023-06-01	2021-07-01	Dasatinib, Flumatinib	dasatinib, bms-354825, bms-354825 hydrate, bms-354825-03, dasatinib hydrate, dasatinib monohydrate, sprycel, flumatinib, hh-gv678, hhgv-678	1	NCT04933526	Phase 4	Phase 4	Compound id 501089 - DASATINIB,Compound id 852984 - FLUMATINIB
Safety and Efficacy of Pegylated IFN-alpha 2B Added to Dasatinib in Newly Diagnosed Chronic Phase Myeloid Leukemia	ATC Class - L01X - Other antineoplastic agents in atc	Leukemia, Myeloid, Chronic-Phase		2016-05-01	2012-09-01	Dasatinib + PegIFN	dasatinib, bms-354825, bms-354825 hydrate, bms-354825-03, dasatinib hydrate, dasatinib monohydrate, sprycel	1	NCT01725204	Phase 2	Phase 2	Compound id 501089 - DASATINIB
Dasatinib in Treating Patients With Advanced Liver Cancer That Cannot Be Removed by Surgery	ATC Class - L01X - Other antineoplastic agents in atc	Adult Primary Hepatocellular Carcinoma, Advanced Adult Primary Liver Cancer, Recurrent Adult Primary Liver Cancer		2011-04-01	2007-04-01	dasatinib	dasatinib, bms-354825, bms-354825 hydrate, bms-354825-03, dasatinib hydrate, dasatinib monohydrate, sprycel	1	NCT00459108	Phase 2	Phase 2	Compound id 501089 - DASATINIB
Imatinib Mesylate or Dasatinib in Treating Patients With Previously Untreated Chronic Phase Chronic Myelogenous Leukemia	ATC Class - L01X - Other antineoplastic agents in atc	Chronic Myelogenous Leukemia, BCR-ABL1 Positive		null	2004-08-01	Dasatinib, Imatinib Mesylate, Laboratory Biomarker Analysis	dasatinib, bms-354825, bms-354825 hydrate, bms-354825-03, dasatinib hydrate, dasatinib monohydrate, sprycel, imatinib, gleevec, sti-571, imatinib mesilate, imatinib mesylate, glivec, imatinib methanesulfonate, qti-571, qti571, sti 571, sti571	1	NCT00070499	Phase 2	Phase 2	Compound id 501089 - DASATINIB,Compound id 713353 - IMATINIB,Compound id 864374 - IMATINIB MESYLATE
Dasatinib and Vorinostat in Treating Patients With Accelerated Phase or Blastic Phase Chronic Myelogenous Leukemia or Acute Lymphoblastic Leukemia	ATC Class - L01X - Other antineoplastic agents in atc	Leukemia		2011-06-01	2008-09-01	cytogenetic analysis, dasatinib, flow cytometry, gene expression analysis, laboratory biomarker analysis, mutation analysis, reverse transcriptase-polymerase chain reaction, vorinostat	dasatinib, bms-354825, bms-354825 hydrate, bms-354825-03, dasatinib hydrate, dasatinib monohydrate, sprycel, vorinostat, mk-0683, mk0683, zolinza	1	NCT00816283	Phase 1	Phase 1	Compound id 501089 - DASATINIB,Compound id 1113023 - VORINOSTAT
Chronic Myelogenous Leukemia or Philadelphia Chromosome Positive Acute Lymphoblastic Leukemic Study	ATC Class - L01X - Other antineoplastic agents in atc	Leukemia		2008-09-01	2005-12-01	Dasatinib	dasatinib, bms-354825, bms-354825 hydrate, bms-354825-03, dasatinib hydrate, dasatinib monohydrate, sprycel	1	NCT00978731	Phase 1	Phase 1	Compound id 501089 - DASATINIB
Randomized Trial of Fulvestrant With or Without Dasatinib in Men and Postmenopausal Women Who Have Hormone Receptor-positive Advanced Breast Cancer Previously Treated With an Aromatase Inhibitor	ATC Class - L01X - Other antineoplastic agents in atc,ATC Class - L02B - Hormone antagonists and related agents	Advanced Breast Cancer		2014-01-01	2008-09-01	Dasatinib, Fulvestrant	dasatinib, bms-354825, bms-354825 hydrate, bms-354825-03, dasatinib hydrate, dasatinib monohydrate, sprycel, fulvestrant, faslodex, ici 182,780, ici-182780, zd-9238, zd9238, ici-182	1	NCT00754325	Phase 2	Phase 2	Compound id 501089 - DASATINIB,Compound id 841536 - FULVESTRANT
Dasatinib Added to Gemcitabine for Subjects With Locally-advanced Pancreatic Cancer	ATC Class - L01X - Other antineoplastic agents in atc	Pancreatic Cancer		2015-03-01	2011-06-01	Placebo, dasatinib	dasatinib, bms-354825, bms-354825 hydrate, bms-354825-03, dasatinib hydrate, dasatinib monohydrate, sprycel	1	NCT01395017	Phase 2	Phase 2	Compound id 501089 - DASATINIB
Comparison of Biomarker Modulation by Inhibition of EGFR and/or SRC Family	ATC Class - L01X - Other antineoplastic agents in atc	Head and Neck Cancer, Non Small Cell Lung Cancer		2014-02-01	2009-01-01	Dasatinib + Placebo, Erlotinib, Erlotinib, Erlotinib plus Dasatinib, Placebo	erlotinib, osi-774, ro-508231, cp-358,774, cp-358774, cp-35877401, r-1415, rg-1415, tarceva, dasatinib, bms-354825, bms-354825 hydrate, bms-354825-03, dasatinib hydrate, dasatinib monohydrate, sprycel	1	NCT00779389	Phase 1	Phase 1	Compound id 141944 - ERLOTINIB,Compound id 501089 - DASATINIB
Trial of Dasatinib (SprycelÂ®) in Subjects With Hormone-refractory Prostate Cancer	ATC Class - L01X - Other antineoplastic agents in atc	Adenocarcinoma of the Prostate, Hormone-refractory Prostate Cancer, Hormone-resistant Prostate Cancer, Prostate Cancer, Recurrent Prostate Cancer		2012-02-01	2007-07-01	Dasatinib	dasatinib, bms-354825, bms-354825 hydrate, bms-354825-03, dasatinib hydrate, dasatinib monohydrate, sprycel	1	NCT00570700	Phase 2	Phase 2	Compound id 501089 - DASATINIB
Fludarabine Phosphate and Total-Body Irradiation Followed by Donor Peripheral Blood Stem Cell Transplant in Treating Patients With Acute Lymphoblastic Leukemia or Chronic Myelogenous Leukemia That Has Responded to Treatment With Imatinib Mesylate, Dasatinib, or Nilotinib	ATC Class - L01X - Other antineoplastic agents in atc,ATC Class - L04A - Immunosuppressants,ATC Class - S01X - Other ophthalmologicals in atc,ATC Class - L01B - Antimetabolites	Adult Acute Lymphoblastic Leukemia in Remission, Adult B Acute Lymphoblastic Leukemia With t(9;22)(q34.1;q11.2); BCR-ABL1, Blastic Phase, Childhood Acute Lymphoblastic Leukemia in Remission, Childhood B Acute Lymphoblastic Leukemia With t(9;22)(q34.1;q11.2); BCR-ABL1, Chronic Myelogenous Leukemia, BCR-ABL1 Positive, Chronic Phase of Disease, Recurrent Adult Acute Lymphoblastic Leukemia, Recurrent…		2018-05-01	2001-07-01	Cyclosporine, Dasatinib, Fludarabine Phosphate, Imatinib Mesylate, Mycophenolate Mofetil, Nilotinib, Nonmyeloablative Allogeneic Hematopoietic Stem Cell Transplantation, Peripheral Blood Stem Cell Transplantation, Therapeutic Allogeneic Lymphocytes, Total-Body Irradiation	mycophenolate mofetil, arzip, cellcept, mycophenolic acid 2-(4-morpholinyl)ethyl ester, myfenax, rs-61443, dasatinib, bms-354825, bms-354825 hydrate, bms-354825-03, dasatinib hydrate, dasatinib monohydrate, sprycel, imatinib, gleevec, sti-571, nilotinib, amn 107, amn-107, amn107, tasigna, imatinib mesilate, imatinib mesylate, glivec, imatinib methanesulfonate, qti-571, qti571, sti 571, sti571, cy…	1	NCT00036738	Phase 2	Phase 2	Compound id 331387 - MYCOPHENOLATE MOFETIL,Compound id 501089 - DASATINIB,Compound id 713353 - IMATINIB,Compound id 794721 - NILOTINIB,Compound id 864374 - IMATINIB MESYLATE,Compound id 1009257 - CYCLOSPORINE,Compound id 1179124 - FLUDARABINE,Compound id 1511840 - FLUDARABINE PHOSPHATE,Compound id 1544531 - MYCOPHENOLATE SODIUM
KRT-232 and TKI Study in Chronic Myeloid Leukemia	ATC Class - L01X - Other antineoplastic agents in atc	Chronic Myeloid Leukemia		2026-06-01	2021-05-01	Dasatinib, KRT-232, Nilotinib	dasatinib, bms-354825, bms-354825 hydrate, bms-354825-03, dasatinib hydrate, dasatinib monohydrate, sprycel, amg232, amg-232, amg 232, krt-232, mdm2 inhibitor amg-232, navtemadlin, nilotinib, amn 107, amn-107, amn107, tasigna	1	NCT04835584	Phase 1	Phase 1	Compound id 501089 - DASATINIB,Compound id 738542 - AMG-232,Compound id 794721 - NILOTINIB
Treatment of Newly Diagnosed Acute Lymphoblastic Leukemia in Children and Adolescents	ATC Class - R01A - Decongestants and other nasal preparations for topical use,ATC Class - A01A - Stomatological preparations,ATC Class - S01B - Antiinflammatory agents, ophthalmologic,ATC Class - S03B - Corticosteroid ophthalmologic and otologic preparations,ATC Class - D07A - Corticosteroid dermatological preparations, plain,ATC Class - D10A - Anti-acne preparations for topical use,ATC Class - C…	Acute Lymphoblastic Leukemia, Pediatric		2026-12-01	2017-03-01	CYTARABINE, Cyclophosphamide, DASATINIB, DEXAMETHASONE, Dexrazoxane, Doxorubicin, ETOPOSIDE, Erwinia asparaginase, HYDROCORTISONE, LEUCOVORIN CALCIUM, MERCAPTOPURINE, METHOTREXATE, NELARABINE, Pegaspargase, Vincristine	mercaptopurine, 6-mercaptopurine, 6-mercaptopurine monohydrate, mercaptopurine anhydrous, mercaptopurine hydrate, nsc-755, puri-nethol, purixan, purinethol, xaluprine, cyclophosphamide, b-518, cyclophosphamide anhydrous, cyclophosphamide hydrate, cyclophosphamide monohydrate, cytoxan (lyophilized), cytoxan, endoxana, lyophilized cytoxan, neosar, nsc-26271, cytarabine, tarabine pfs, alexan, alexan…	1	NCT03020030	Phase 3	Phase 3	Compound id 3227 - MERCAPTOPURINE,Compound id 51794 - CYCLOPHOSPHAMIDE,Compound id 95279 - CYTARABINE,Compound id 490791 - METHOTREXATE,Compound id 501089 - DASATINIB,Compound id 1903831 - DEXAMETHASONE,Compound id 570936 - LEUCOVORIN,Compound id 632578 - LEUCOVORIN CALCIUM,Compound id 791569 - DOXORUBICIN,Compound id 866156 - ETOPOSIDE,Compound id 986271 - VINCRISTINE,Compound id 1128101 - DEXRA…
Dasatinib and Lapatinib Ditolsylate in Treating Patients With Advanced Solid Tumors That Cannot Be Removed By Surgery	ATC Class - L01X - Other antineoplastic agents in atc	Unspecified Adult Solid Tumor, Protocol Specific		2014-12-01	2008-08-01	dasatinib, laboratory biomarker analysis, lapatinib ditosylate, pharmacological study	dasatinib, bms-354825, bms-354825 hydrate, bms-354825-03, dasatinib hydrate, dasatinib monohydrate, sprycel, lapatinib, gw-2016, gsk-572016, gw-572016, gw-572016x, gw572016, tyverb, lapatinib ditosylate, gw-572016f, gw572016f, lapatinib ditoluenesulfonate monohydrate, lapatinib ditosylate monohydrate, lapatinib tosilate hydrate, tykerb	1	NCT00662636	Phase 1	Phase 1	Compound id 501089 - DASATINIB,Compound id 810723 - LAPATINIB,Compound id 993715 - LAPATINIB DITOSYLATE
Determination of Intratumoral Concentrations of Kinase Inhibitors in Patients With Advanced Solid Malignancies.	ATC Class - L01X - Other antineoplastic agents in atc,ATC Class - L04A - Immunosuppressants	Advanced Solid Tumors, Cancer		2019-12-01	2011-08-01	Dasatinib, Erlotinib, Everolimus, Lapatinib, Pazopanib, Sorafenib, Sunitinib, Vemurafenib, skin biopsy (optional), tumor biopsy	erlotinib, osi-774, ro-508231, cp-358,774, cp-358774, cp-35877401, r-1415, rg-1415, tarceva, sunitinib, sutent, su-011248, su-11248, su011248, pazopanib, gw786034, votrient, sorafenib, bay 43-9006, bay-43-9006, nexavar, dasatinib, bms-354825, bms-354825 hydrate, bms-354825-03, dasatinib hydrate, dasatinib monohydrate, sprycel, vemurafenib, plx-4032, plx4032, rg 7204, rg-7204, ro 5185426, ro-51-85…	1	NCT01636908	null		Compound id 141944 - ERLOTINIB,Compound id 154683 - SUNITINIB,Compound id 340003 - PAZOPANIB,Compound id 429624 - SORAFENIB,Compound id 501089 - DASATINIB,Compound id 505877 - VEMURAFENIB,Compound id 810723 - LAPATINIB,Compound id 1012475 - EVEROLIMUS
An Open-Label, Phase I/II Study of Two Different Schedules of Dasatinib (Sprycel) and Decitabine (Dacogen) Used in Combination for Patients With Accelerated or Blastic Phase Chronic Myelogenous Leukemia (Protocol CA180357)	ATC Class - L01X - Other antineoplastic agents in atc,ATC Class - L01B - Antimetabolites	Leukemia		2019-09-01	2012-06-01	Dasatinib, Decitabine, Decitabine	decitabine, dacogen, nsc-127716, dasatinib, bms-354825, bms-354825 hydrate, bms-354825-03, dasatinib hydrate, dasatinib monohydrate, sprycel	1	NCT01498445	Phase 1	Phase 1	Compound id 84223 - DECITABINE,Compound id 501089 - DASATINIB
Study of Erlotinib in Combination With Dasatinib	ATC Class - L01X - Other antineoplastic agents in atc	Advanced Cancer		null	2009-04-01	Dasatinib, Erlotinib Hydrochloride	erlotinib, osi-774, ro-508231, cp-358,774, cp-358774, cp-35877401, r-1415, rg-1415, tarceva, erlotinib hydrochloride, cp-358, cp-358,774-01, cp-358774-01, dasatinib, bms-354825, bms-354825 hydrate, bms-354825-03, dasatinib hydrate, dasatinib monohydrate, sprycel	1	NCT00895128	Phase 1	Phase 1	Compound id 141944 - ERLOTINIB,Compound id 260412 - ERLOTINIB HYDROCHLORIDE,Compound id 501089 - DASATINIB
Psma Intensity Can be Altered by Androgen and Phospho-SrC Obstruction	ATC Class - L01X - Other antineoplastic agents in atc	Metastatic Prostate Cancer		2022-06-01	2021-10-01	Darolutamide, Dasatinib	darolutamide, bay 1841788, bay-1841788, bay1841788, nubeqa, odm-201, dasatinib, bms-354825, bms-354825 hydrate, bms-354825-03, dasatinib hydrate, dasatinib monohydrate, sprycel	1	NCT04925648	Phase 2	Phase 2	Compound id 109838 - DAROLUTAMIDE,Compound id 501089 - DASATINIB
CAR-T Cells Combined With Dasatinib for Patients With Relapsed and/or Refractory B-cell Hematological Malignancies	ATC Class - L01X - Other antineoplastic agents in atc	Acute Lymphoblastic Leukemia, in Relapse, Acute Lymphocytic Leukaemia Refractory, Multiple Myeloma in Relapse, Multiple Myeloma, Refractory, Non-Hodgkin's Lymphoma Refractory, Non-Hodgkin's Lymphoma, Relapsed		2026-11-01	2020-11-01	CD19/BCMA Targeted CAR T-cells, CD19/BCMA Targeted CAR T-cells and dasatinib	dasatinib, bms-354825, bms-354825 hydrate, bms-354825-03, dasatinib hydrate, dasatinib monohydrate, sprycel	1	NCT04603872	Early Phase 1	Early Phase 1	Compound id 501089 - DASATINIB
Hematopoietic Stem Cell Transplant Survivors Study (HTSS Study)	ATC Class - L01X - Other antineoplastic agents in atc,ATC Class - G03C - Estrogens, sex hormones and modulators of the genital system	Stem Cell Transplant		2021-12-01	2016-03-01	Dasatinib, Quercetin, Standard of Care - Observation Only	dasatinib, bms-354825, bms-354825 hydrate, bms-354825-03, dasatinib hydrate, dasatinib monohydrate, sprycel, quercetin, xanthaurine, meletin, sophoretin, c.i. natural red 1, ldn 0052529, ldn-0052529, nsc 57655, nsc 9219, nsc-57655, nsc-9219	1	NCT02652052	null		Compound id 501089 - DASATINIB,Compound id 1305802 - QUERCETIN
Dasatinib Versus Nilotinib for Treatment NaÃ¯ve Chronic Myeloid Leukemia	ATC Class - L01X - Other antineoplastic agents in atc,ATC Class - J07A - Bacterial vaccines	Chronic Myeloid Leukemia - Chronic Phase		2018-09-01	2017-08-01	Dasatinib 100 MG [Sprycel], Nilotinib 150mg oral capsule [Tasigna]	dasatinib, bms-354825, bms-354825 hydrate, bms-354825-03, dasatinib hydrate, dasatinib monohydrate, sprycel, nilotinib, amn 107, amn-107, amn107, tasigna, nilotinib hydrochloride monohydrate, nilotinib hydrochloride, nilotinib hydrochloride hydrate	1	NCT03079505	Phase 3	Phase 3	Compound id 501089 - DASATINIB,Compound id 794721 - NILOTINIB,Compound id 846263 - NILOTINIB HYDROCHLORIDE MONOHYDRATE
Prospective Pilot Trial to Assess a Multimodal Molecular Targeted Therapy in Children, Adolescent and Young Adults With Relapsed or Refractory High-grade Pineoblastoma	ATC Class - L01X - Other antineoplastic agents in atc,ATC Class - S01X - Other ophthalmologicals in atc,ATC Class - L04A - Immunosuppressants,ATC Class - L01A - Alkylating agents	Pineoblastoma		2021-04-01	2016-04-01	Dasatinib, Irinotecan, Rapamycin, Temozolomide	temozolomide, m&b-39831, ccrg-81045, m&b 39831, m-39831, nsc-362856, sch 52365, sch-52365, temodal, temomedac, temodar, dasatinib, bms-354825, bms-354825 hydrate, bms-354825-03, dasatinib hydrate, dasatinib monohydrate, sprycel, irinotecan, camptosar, sirolimus, ay-22989, l04aa10, nsc-226080, rapamycin, rapamune, sm-88 component sirolimus, wy-090217	1	NCT02596828	Phase 2	Phase 2	Compound id 27258 - TEMOZOLOMIDE,Compound id 501089 - DASATINIB,Compound id 881410 - IRINOTECAN,Compound id 997103 - SIROLIMUS
Targeted Therapy in Treating Patients With Relapsed or Refractory Acute Lymphoblastic Leukemia or Acute Myelogenous Leukemia	ATC Class - L01X - Other antineoplastic agents in atc	Acute Myeloid Leukemia Arising From Previous Myelodysplastic Syndrome, Chronic Myelomonocytic Leukemia, Recurrent Acute Lymphoblastic Leukemia, Recurrent Acute Myeloid Leukemia, Refractory Acute Lymphoblastic Leukemia, Refractory Acute Myeloid Leukemia		2017-04-01	2012-05-01	Antitumor Drug Screening Assay, Dasatinib, Idelalisib, Laboratory Biomarker Analysis, Pacritinib, Pharmacological Study, Ponatinib, Ponatinib Hydrochloride, Ruxolitinib, Sorafenib, Sorafenib Tosylate, Sunitinib, Sunitinib Malate	sunitinib, sutent, su-011248, su-11248, su011248, idelalisib, cal-101, gs-11cal-101, gs-1101, zydelig, sorafenib, bay 43-9006, bay-43-9006, nexavar, dasatinib, bms-354825, bms-354825 hydrate, bms-354825-03, dasatinib hydrate, dasatinib monohydrate, sprycel, pacritinib, onx-0803, sb-1518, sb1518, sunitinib malate, pha-290940ad, su-010398, su-011248 l-malate salt, su010398, su011248 l-malate salt, …	1	NCT01620216	Phase 2	Phase 2	Compound id 154683 - SUNITINIB,Compound id 379664 - IDELALISIB,Compound id 429624 - SORAFENIB,Compound id 501089 - DASATINIB,Compound id 646856 - PACRITINIB,Compound id 769039 - SUNITINIB MALATE,Compound id 801073 - PONATINIB,Compound id 826337 - PONATINIB HYDROCHLORIDE,Compound id 885050 - SORAFENIB TOSYLATE,Compound id 1406851 - RUXOLITINIB
Etoposide, Prednisone, Vincristine Sulfate, Cyclophosphamide, and Doxorubicin in Treating Patients With Acute Lymphoblastic Leukemia or Lymphoblastic Lymphoma	ATC Class - L01X - Other antineoplastic agents in atc,ATC Class - L01C - Plant alkaloids and other natural products, antineoplastic drugs,ATC Class - L01D - Cytotoxic antibiotics and related substances,ATC Class - L01A - Alkylating agents,ATC Class - A07E - Intestinal antiinflammatory agents,ATC Class - H02A - Corticosteroids for systemic use, plain,ATC Class - J07B - Viral vaccines,ATC Class - V…	Acute Lymphoblastic Leukemia, Lymphoblastic Lymphoma		2022-12-01	2017-02-01	Cyclophosphamide, Dasatinib, Doxorubicin, Etoposide, Imatinib Mesylate, Laboratory Biomarker Analysis, Prednisone, Rituximab, Vincristine Sulfate	cyclophosphamide, b-518, cyclophosphamide anhydrous, cyclophosphamide hydrate, cyclophosphamide monohydrate, cytoxan (lyophilized), cytoxan, endoxana, lyophilized cytoxan, neosar, nsc-26271, dasatinib, bms-354825, bms-354825 hydrate, bms-354825-03, dasatinib hydrate, dasatinib monohydrate, sprycel, imatinib, gleevec, sti-571, doxorubicin, doxil, rubex, adriamycin, hydroxydaunorubicin, adriblastin…	1	NCT03023046	Phase 2	Phase 2	Compound id 51794 - CYCLOPHOSPHAMIDE,Compound id 501089 - DASATINIB,Compound id 713353 - IMATINIB,Compound id 791569 - DOXORUBICIN,Compound id 864374 - IMATINIB MESYLATE,Compound id 866156 - ETOPOSIDE,Compound id 986271 - VINCRISTINE,Compound id 998224 - VINCRISTINE SULFATE,Compound id 1688535 - PREDNISONE,Compound id 2689081 - RITUXIMAB
TORI 104 Pre-Surgical Dasatinib	ATC Class - L01X - Other antineoplastic agents in atc	Breast Cancer		null	null	Dasatinib	dasatinib, bms-354825, bms-354825 hydrate, bms-354825-03, dasatinib hydrate, dasatinib monohydrate, sprycel	1	NCT01410708	Phase 2	Phase 2	Compound id 501089 - DASATINIB
Dasatinib in Treating Patients With Stage IV Pancreatic Cancer	ATC Class - L01X - Other antineoplastic agents in atc	Pancreatic Cancer		null	2007-09-01	dasatinib, immunoenzyme technique, immunohistochemistry staining method, laboratory biomarker analysis, quality-of-life assessment	dasatinib, bms-354825, bms-354825 hydrate, bms-354825-03, dasatinib hydrate, dasatinib monohydrate, sprycel	1	NCT00544908	Phase 2	Phase 2	Compound id 501089 - DASATINIB
A Pivotal Study of HQP1351 in Patients With Chronic Myeloid Leukemia in Chronic Phase	ATC Class - L01X - Other antineoplastic agents in atc,ATC Class - S01A - Antiinfective ophthalmologics,ATC Class - L03A - Interferon	Chronic Myeloid Leukemia, Chronic Phase		2023-12-01	2019-10-01	HQP1351, Homoharringtonine, Hydroxyurea or Interferon-based therapy, Imatinib, Dasatinib or Nilotinib	hydroxyurea, droxia, hydroxycarbamide, hydrea, nsc-32065, siklos, sq 1089, sq-1089, dasatinib, bms-354825, bms-354825 hydrate, bms-354825-03, dasatinib hydrate, dasatinib monohydrate, sprycel, imatinib, gleevec, sti-571, omacetaxine mepesuccinate, cgx-635, homoharringtonine, nsc-141633, synribo, nilotinib, amn 107, amn-107, amn107, tasigna, interferon, gzd-824 dimesylate, d-824 dimesylate, hqp-13…	1	NCT04126681	Phase 2	Phase 2	Compound id 399 - HYDROXYUREA,Compound id 501089 - DASATINIB,Compound id 713353 - IMATINIB,Compound id 791449 - OMACETAXINE MEPESUCCINATE,Compound id 794721 - NILOTINIB,Compound id 2741143 - INTERFERON,Compound id 2817806 - GZD-824 DIMESYLATE
Testing the Use of Steroids and Tyrosine Kinase Inhibitors With Blinatumomab or Chemotherapy for Newly Diagnosed BCR-ABL-Positive Acute Lymphoblastic Leukemia in Adults	ATC Class - L01X - Other antineoplastic agents in atc,ATC Class - R01A - Decongestants and other nasal preparations for topical use,ATC Class - A01A - Stomatological preparations,ATC Class - S01B - Antiinflammatory agents, ophthalmologic,ATC Class - S03B - Corticosteroid ophthalmologic and otologic preparations,ATC Class - D07A - Corticosteroid dermatological preparations, plain,ATC Class - D10A …	B Acute Lymphoblastic Leukemia With t(9;22)(q34.1;q11.2); BCR-ABL1		2028-07-01	2020-10-01	Blinatumomab, Cyclophosphamide, Cytarabine, Dasatinib, Dexamethasone, Doxorubicin Hydrochloride, Mesna, Methotrexate, Ponatinib Hydrochloride, Prednisone, Vincristine Sulfate	mesna, d 7093, d-7093, mistabron, mesnex, nsc-113891, uromitexan, cyclophosphamide, b-518, cyclophosphamide anhydrous, cyclophosphamide hydrate, cyclophosphamide monohydrate, cytoxan (lyophilized), cytoxan, endoxana, lyophilized cytoxan, neosar, nsc-26271, cytarabine, tarabine pfs, alexan, alexan 100, ara-cytidine, arabinosyl cytosine, cytosar, cytosar-u, depocyte, depocyt, nsc-287459, u-19,920, …	1	NCT04530565	Phase 3	Phase 3	Compound id 12009 - MESNA,Compound id 51794 - CYCLOPHOSPHAMIDE,Compound id 95279 - CYTARABINE,Compound id 490791 - METHOTREXATE,Compound id 501089 - DASATINIB,Compound id 1903831 - DEXAMETHASONE,Compound id 791569 - DOXORUBICIN,Compound id 801073 - PONATINIB,Compound id 826096 - DOXORUBICIN HYDROCHLORIDE,Compound id 826337 - PONATINIB HYDROCHLORIDE,Compound id 986271 - VINCRISTINE,Compound id 998…
A Phase II Study of Dasatinib in Children and Adolescents With Newly Diagnosed Chronic Phase CML or With Ph+ Leukemias Resistant or Intolerant to Imatinib	ATC Class - L01X - Other antineoplastic agents in atc	Leukemia		2021-09-01	2009-02-01	Dasatinib	dasatinib, bms-354825, bms-354825 hydrate, bms-354825-03, dasatinib hydrate, dasatinib monohydrate, sprycel	1	NCT00777036	Phase 2	Phase 2	Compound id 501089 - DASATINIB
Targeting Cellular Senescence With Senolytics to Improve Skeletal Health in Older Humans	ATC Class - L01X - Other antineoplastic agents in atc,ATC Class - G03C - Estrogens, sex hormones and modulators of the genital system	Healthy		2023-03-01	2020-06-01	Dasatinib, Fisetin, Quercetin	dasatinib, bms-354825, bms-354825 hydrate, bms-354825-03, dasatinib hydrate, dasatinib monohydrate, sprycel, fisetin, nsc-407010, nsc-656275, quercetin, xanthaurine, meletin, sophoretin, c.i. natural red 1, ldn 0052529, ldn-0052529, nsc 57655, nsc 9219, nsc-57655, nsc-9219	1	NCT04313634	Phase 2	Phase 2	Compound id 501089 - DASATINIB,Compound id 1234742 - FISETIN,Compound id 1305802 - QUERCETIN
Dasatinib, Bevacizumab, Paclitaxel in Patients With Advanced Malignancies	ATC Class - L01X - Other antineoplastic agents in atc,ATC Class - L01C - Plant alkaloids and other natural products, antineoplastic drugs,ATC Class - J07B - Viral vaccines	Advanced Cancer		2021-11-01	2009-11-01	Bevacizumab, Dasatinib, Paclitaxel	dasatinib, bms-354825, bms-354825 hydrate, bms-354825-03, dasatinib hydrate, dasatinib monohydrate, sprycel, paclitaxel, abi-007, abi-007 component paclitaxel, abraxane, bms 181339-01, bms-181339-01, dhp 107, dhp-107, mbt 0206, mbt-0206, nk 105, nk-105, nsc-125973, pacitaxel, paxene, qw-8184, taxol, taxol 100, bevacizumab, 12-igg1, ava-1, avastin, bevacizumab beta, bi 695502, bs-503a, chs-5217, c…	1	NCT01015222	Phase 1	Phase 1	Compound id 501089 - DASATINIB,Compound id 991478 - PACLITAXEL,Compound id 2689088 - BEVACIZUMAB
A Phase III Study of Dasatinib vs Imatinib in Patients With Newly Diagnosed Chronic Phase Chronic Myeloid Leukemia	ATC Class - L01X - Other antineoplastic agents in atc	Myeloid Leukemia, Chronic		2015-12-01	2007-09-01	Dasatinib, Imatinib	dasatinib, bms-354825, bms-354825 hydrate, bms-354825-03, dasatinib hydrate, dasatinib monohydrate, sprycel, imatinib, gleevec, sti-571	1	NCT00481247	Phase 3	Phase 3	Compound id 501089 - DASATINIB,Compound id 713353 - IMATINIB
ABL001 + Dasatinib + Prednisone in BCR-ABL+ B-ALL or CML	ATC Class - L01X - Other antineoplastic agents in atc,ATC Class - A07E - Intestinal antiinflammatory agents,ATC Class - H02A - Corticosteroids for systemic use, plain,ATC Class - V07A - All other non-therapeutic products	B-cell Acute Lymphoblastic Leukemia, Chronic Myeloid Leukemia (CML) in Lymphoid Blast Crisis, Philadelphia Chromosome Positive Acute Lymphoblastic Leukemia Ph+ ALL		2024-11-01	2018-07-01	ABL001, Dasatinib, Prednisone	asciminib, abl-001, abl001, abl001-nx, nvp-abl001, dasatinib, bms-354825, bms-354825 hydrate, bms-354825-03, dasatinib hydrate, dasatinib monohydrate, sprycel, prednisone, sterapred, cortan, cortancyl, decortisyl, delta-dome, deltasone, fernisone, liquid pred, lodotra, meticorten, nsc-10023, orasone, paracort, prednicen-m, prednisone intensol, prednisone tablets, rayos, servisone	1	NCT03595917	Phase 1	Phase 1	Compound id 403250 - ASCIMINIB,Compound id 501089 - DASATINIB,Compound id 1688535 - PREDNISONE
Dasatinib for Immune Modulation After Donor Stem Cell Transplant for Hematologic Malignancies	ATC Class - L01X - Other antineoplastic agents in atc	Hodgkin's Lymphoma, Lymphoid Leukemia, Multiple Myeloma, Myelodysplastic Syndrome, Myeloid Leukemia, Non-Hodgkin's Lymphoma		2018-10-01	2012-05-01	Dasatinib, laboratory biomarker analysis	dasatinib, bms-354825, bms-354825 hydrate, bms-354825-03, dasatinib hydrate, dasatinib monohydrate, sprycel	1	NCT01643603	Phase 1	Phase 1	Compound id 501089 - DASATINIB
Dasatinib and Venetoclax in Treating Patients With Philadelphia Chromosome Positive or BCR-ABL1 Positive Early Chronic Phase Chronic Myelogenous Leukemia	ATC Class - L01X - Other antineoplastic agents in atc	Chronic Phase Chronic Myelogenous Leukemia, BCR-ABL1 Positive, Philadelphia Chromosome Positive, BCR-ABL1 Positive Chronic Myelogenous Leukemia		2040-12-01	2016-02-01	Dasatinib, Laboratory Biomarker Analysis, Venetoclax	dasatinib, bms-354825, bms-354825 hydrate, bms-354825-03, dasatinib hydrate, dasatinib monohydrate, sprycel, venetoclax, abt-199, gdc-0199, rg-7601, rg7601, venclexta	1	NCT02689440	Phase 2	Phase 2	Compound id 501089 - DASATINIB,Compound id 990201 - VENETOCLAX
Explore the Synergy of Combination TKI Therapy	ATC Class - L01X - Other antineoplastic agents in atc	Healthy Volunteers		2014-10-01	2014-09-01	Dasatinib, Dasatinib+Imatinib	dasatinib, bms-354825, bms-354825 hydrate, bms-354825-03, dasatinib hydrate, dasatinib monohydrate, sprycel, imatinib, gleevec, sti-571	1	NCT02129166	Phase 1	Phase 1	Compound id 501089 - DASATINIB,Compound id 713353 - IMATINIB
Dasatinib or Placebo, Radiation Therapy, and Temozolomide in Treating Patients With Newly Diagnosed Glioblastoma Multiforme	ATC Class - L01X - Other antineoplastic agents in atc,ATC Class - L01A - Alkylating agents	Brain and Central Nervous System Tumors		2019-11-01	2009-06-01	dasatinib, placebo, radiation therapy, temozolomide	temozolomide, m&b-39831, ccrg-81045, m&b 39831, m-39831, nsc-362856, sch 52365, sch-52365, temodal, temomedac, temodar, dasatinib, bms-354825, bms-354825 hydrate, bms-354825-03, dasatinib hydrate, dasatinib monohydrate, sprycel	1	NCT00869401	Phase 1	Phase 1	Compound id 27258 - TEMOZOLOMIDE,Compound id 501089 - DASATINIB
Dasatinib for Modulating Immune System After Autologous Stem Cell Transplants for Multiple Myeloma, Non-Hodgkin, or Hodgkin Lymphoma	ATC Class - L01X - Other antineoplastic agents in atc	Hodgkin's Lymphoma, Multiple, Multiple Myeloma, Mycosis Fungoides, Non-Hodgkin's Lymphoma		2018-10-01	2015-02-01	Dasatinib	dasatinib, bms-354825, bms-354825 hydrate, bms-354825-03, dasatinib hydrate, dasatinib monohydrate, sprycel	1	NCT01609816	Phase 1	Phase 1	Compound id 501089 - DASATINIB
Dasatinib as Therapy for Myeloproliferative Disorders (MPDs)	ATC Class - L01X - Other antineoplastic agents in atc	Acute Myeloid Leukemia, Agnogenic Myeloid Metaplasia, Hypereosinophilic Syndrome, Leukemia, Myelomonocytic, Chronic, Mastocytosis, Myelodysplastic Syndromes, Myelofibrosis, Polycythemia Vera		2017-03-01	2005-11-01	Dasatinib (BMS-354825)	dasatinib, bms-354825, bms-354825 hydrate, bms-354825-03, dasatinib hydrate, dasatinib monohydrate, sprycel	1	NCT00255346	Phase 2	Phase 2	Compound id 501089 - DASATINIB
Treatment of Adult Ph+ LAL With BMS-354825	ATC Class - L01X - Other antineoplastic agents in atc	Lymphoblastic Leukemia, Acute		2008-09-01	2006-09-01	Dasatinib	dasatinib, bms-354825, bms-354825 hydrate, bms-354825-03, dasatinib hydrate, dasatinib monohydrate, sprycel	1	NCT00391989	Phase 2	Phase 2	Compound id 501089 - DASATINIB
Targeted Therapy Directed by Genetic Testing in Treating Patients With Advanced Refractory Solid Tumors, Lymphomas, or Multiple Myeloma (The MATCH Screening Trial)	ATC Class - L01X - Other antineoplastic agents in atc	Advanced Malignant Solid Neoplasm, Bladder Carcinoma, Breast Carcinoma, Cervical Carcinoma, Colon Carcinoma, Colorectal Carcinoma, Endometrial Carcinoma, Esophageal Carcinoma, Gastric Carcinoma, Glioma, Head and Neck Carcinoma, Kidney Carcinoma, Liver and Intrahepatic Bile Duct Carcinoma, Lung Carcinoma, Lymphoma, Malignant Uterine Neoplasm, Melanoma, Ovarian Carcinoma, Pancreatic Carcinoma, Plas…		2022-06-01	2015-08-01	Adavosertib, Afatinib, Afatinib Dimaleate, Binimetinib, Capivasertib, Copanlisib, Copanlisib Hydrochloride, Crizotinib, Cytology Specimen Collection Procedure, Dabrafenib, Dabrafenib Mesylate, Dasatinib, Defactinib, Defactinib Hydrochloride, Erdafitinib, FGFR Inhibitor AZD4547, Ipatasertib, Laboratory Biomarker Analysis, Larotrectinib, Larotrectinib Sulfate, Nivolumab, Osimertinib, PI3K-beta Inhi…	sunitinib, sutent, su-011248, su-11248, su011248, ulixertinib, bvd-523, bvd-erk, vrt-752271, crizotinib, pf-2341066, pf-02341066, xalkori, capivasertib, azc5363, azd 5363, azd-5363, azd5363, gsk-2636771, gsk 2636771, gsk2636771, larotrectinib, arry-470, bay-2757556, bay2757556, loxo-101, vitrakvi, ipatasertib, gdc-0068, rg-7440, rg7440, pd0332991, palbociclib, ibrance, pd-0332991, pf-332991, dasa…	1	NCT02465060	Phase 2	Phase 2	Compound id 154683 - SUNITINIB,Compound id 211897 - ULIXERTINIB,Compound id 259783 - CRIZOTINIB,Compound id 297861 - CAPIVASERTIB,Compound id 387433 - GSK-2636771,Compound id 401319 - LAROTRECTINIB,Compound id 455809 - IPATASERTIB,Compound id 495280 - PALBOCICLIB,Compound id 501089 - DASATINIB,Compound id 535371 - ERDAFITINIB,Compound id 576596 - AFATINIB,Compound id 598984 - TASELISIB,Compound i…
Safety and Efficacy of Exemestane Plus Dasatinib Versus Placebo for Advanced ER+ Breast Cancer	ATC Class - L01X - Other antineoplastic agents in atc,ATC Class - L02B - Hormone antagonists and related agents	Breast Cancer		2012-12-01	2009-02-01	Exemestane + Dasatinib, Exemestane + Placebo	dasatinib, bms-354825, bms-354825 hydrate, bms-354825-03, dasatinib hydrate, dasatinib monohydrate, sprycel, exemestane, aromasin, fce-24304, fce24304, pnu-155971	1	NCT00767520	Phase 2	Phase 2	Compound id 501089 - DASATINIB,Compound id 1334249 - EXEMESTANE
Dasatinib in Treating Young Patients With Recurrent or Refractory Solid Tumors or Philadelphia Chromosome-Positive Acute Lymphoblastic Leukemia or Chronic Myelogenous Leukemia That Did Not Respond to Imatinib Mesylate	ATC Class - L01X - Other antineoplastic agents in atc	Accelerated Phase Chronic Myelogenous Leukemia, Blastic Phase Chronic Myelogenous Leukemia, Childhood Chronic Myelogenous Leukemia, Chronic Myelogenous Leukemia, BCR-ABL1 Positive, Meningeal Chronic Myelogenous Leukemia, Recurrent Childhood Acute Lymphoblastic Leukemia, Relapsing Chronic Myelogenous Leukemia, Unspecified Childhood Solid Tumor, Protocol Specific		null	2006-03-01	dasatinib, laboratory biomarker analysis, pharmacological study	dasatinib, bms-354825, bms-354825 hydrate, bms-354825-03, dasatinib hydrate, dasatinib monohydrate, sprycel	1	NCT00316953	Phase 1	Phase 1	Compound id 501089 - DASATINIB
Phase II Dasatinib Study in Advanced Breast Cancer	ATC Class - L01X - Other antineoplastic agents in atc	Advanced Breast Cancer		2011-05-01	2007-10-01	Dasatinib	dasatinib, bms-354825, bms-354825 hydrate, bms-354825-03, dasatinib hydrate, dasatinib monohydrate, sprycel	1	NCT00546104	Phase 2	Phase 2	Compound id 501089 - DASATINIB
Extension Study of IDEAL (Imatinib) for Chronic Myelgenous Leukemia (CML)	ATC Class - L01X - Other antineoplastic agents in atc	Leukemia, Myelogenous, Chronic, BCR-ABL Positive		2023-05-01	2014-10-01	IDEAL-E observation (investigators choice of imatinib, nilotinib, dasatinib, radotinib)	dasatinib, bms-354825, bms-354825 hydrate, bms-354825-03, dasatinib hydrate, dasatinib monohydrate, sprycel, imatinib, gleevec, sti-571, nilotinib, amn 107, amn-107, amn107, tasigna, radotinib, iy5511	1	NCT02421926	null		Compound id 501089 - DASATINIB,Compound id 713353 - IMATINIB,Compound id 794721 - NILOTINIB,Compound id 810595 - RADOTINIB
A Phase II Study of Dasatinib in the Treatment of Relapsed or Plateau Phase Multiple Myeloma	ATC Class - L01X - Other antineoplastic agents in atc	Relapsed, Refractory or Plateau Phase Multiple Myeloma		2008-01-01	2007-01-01	Dasatinib	dasatinib, bms-354825, bms-354825 hydrate, bms-354825-03, dasatinib hydrate, dasatinib monohydrate, sprycel	1	NCT00429949	Phase 2	Phase 2	Compound id 501089 - DASATINIB
Clinical Trial Evaluating the Combination of Vandetanib and Dasatinib During and After Radiation Therapy (RT) in Children With Newly Diagnosed Diffuse Intrinsic Pontine Glioma (DIPG)	ATC Class - L01X - Other antineoplastic agents in atc	Diffuse Intrinsic Pontine Glioma		2014-06-01	2009-10-01	vandetanib and dasatinib	vandetanib, caprelsa, gnf-pf-2188, zd-64, zd-6474, zd6474, zactima, dasatinib, bms-354825, bms-354825 hydrate, bms-354825-03, dasatinib hydrate, dasatinib monohydrate, sprycel	1	NCT00996723	Phase 1	Phase 1	Compound id 233726 - VANDETANIB,Compound id 501089 - DASATINIB
Dasatinib in Treating Patients With Recurrent or Persistent Ovarian, Fallopian Tube, Endometrial or Peritoneal Cancer	ATC Class - L01X - Other antineoplastic agents in atc	Endometrial Clear Cell Adenocarcinoma, Ovarian Clear Cell Cystadenocarcinoma, Recurrent Fallopian Tube Carcinoma, Recurrent Ovarian Carcinoma, Recurrent Primary Peritoneal Carcinoma, Recurrent Uterine Corpus Cancer		null	2014-02-01	Dasatinib, Laboratory Biomarker Analysis	dasatinib, bms-354825, bms-354825 hydrate, bms-354825-03, dasatinib hydrate, dasatinib monohydrate, sprycel	1	NCT02059265	Phase 2	Phase 2	Compound id 501089 - DASATINIB
A Study of REduction And DIscontinuation Treatment of TKI (Imatinib, Nilotinib, Dasatinib and Bosutinib)	ATC Class - L01X - Other antineoplastic agents in atc	BCR-ABL Positive Chronic Myelogenous Leukemia, Chronic Myeloid Leukemia, Chronic Myeloid Leukemia in Remission		2025-01-01	2020-01-01	Bosutinib, Dasatinib, Imatinib, Nilotinib	dasatinib, bms-354825, bms-354825 hydrate, bms-354825-03, dasatinib hydrate, dasatinib monohydrate, sprycel, bosutinib, bosulif, bosutinib monohydrate, sk-606, ski-606, imatinib, gleevec, sti-571, nilotinib, amn 107, amn-107, amn107, tasigna	1	NCT04578847	Phase 2	Phase 2	Compound id 501089 - DASATINIB,Compound id 679371 - BOSUTINIB,Compound id 713353 - IMATINIB,Compound id 794721 - NILOTINIB
Dasatinib Combination Therapy With the Smoothened (SMO) Inhibitor BMS-833923 in Chronic Myeloid Leukemia (CML)	ATC Class - L01X - Other antineoplastic agents in atc	Leukemia		2013-04-01	2011-01-01	BMS-833923, Dasatinib	dasatinib, bms-354825, bms-354825 hydrate, bms-354825-03, dasatinib hydrate, dasatinib monohydrate, sprycel, bms-833923, bms-833923 dimesylate monohydrate, xl-139, xl139	1	NCT01218477	Phase 1	Phase 1	Compound id 501089 - DASATINIB,Compound id 745841 - BMS-833923
Bristol-Myers Squibb Dasatinib Src Inhibition in Endometrial Cancer	ATC Class - L01X - Other antineoplastic agents in atc	Endometrial Cancer		2015-12-01	2012-01-01	Dasatinib, Dasatinib	dasatinib, bms-354825, bms-354825 hydrate, bms-354825-03, dasatinib hydrate, dasatinib monohydrate, sprycel	1	NCT01482728	Early Phase 1	Early Phase 1	Compound id 501089 - DASATINIB
Dasatinib for Patients Achieving Complete Molecular Response for Cure D-NewS Trial	ATC Class - L01X - Other antineoplastic agents in atc	Myelogenous Leukemia, Chronic, Chronic Phase		null	2012-11-01	dasatinib	dasatinib, bms-354825, bms-354825 hydrate, bms-354825-03, dasatinib hydrate, dasatinib monohydrate, sprycel	1	NCT01887561	Phase 2	Phase 2	Compound id 501089 - DASATINIB
Testing Dasatinib as a Potential Targeted Treatment in Cancers With DDR2 Genetic Changes (MATCH-Subprotocol X)	ATC Class - L01X - Other antineoplastic agents in atc	Advanced Lymphoma, Advanced Malignant Solid Neoplasm, Hematopoietic and Lymphoid Cell Neoplasm, Refractory Lymphoma, Refractory Malignant Solid Neoplasm, Refractory Plasma Cell Myeloma		null	2016-02-01	Dasatinib	dasatinib, bms-354825, bms-354825 hydrate, bms-354825-03, dasatinib hydrate, dasatinib monohydrate, sprycel	1	NCT04439305	Phase 2	Phase 2	Compound id 501089 - DASATINIB
Frequency and Severity of Pleural Effusion Associated With the Use of Dasatinib in Patients With Chronic Myeloid Leukemia. A Descriptive, Mexican Multicenter Study	ATC Class - L01X - Other antineoplastic agents in atc	Leukemia		2017-03-01	2015-07-01	Dasatinib	dasatinib, bms-354825, bms-354825 hydrate, bms-354825-03, dasatinib hydrate, dasatinib monohydrate, sprycel	1	NCT02546791	null		Compound id 501089 - DASATINIB
Phase I (PH I) Mad Refractory Solid Tumor Study	ATC Class - L01X - Other antineoplastic agents in atc	Neoplasms		2007-07-01	2004-07-01	Dasatinib	dasatinib, bms-354825, bms-354825 hydrate, bms-354825-03, dasatinib hydrate, dasatinib monohydrate, sprycel	1	NCT00099606	Phase 1	Phase 1	Compound id 501089 - DASATINIB
An Investigational Immuno-therapy Study to Test Combination Treatments in Patients With Advanced Non-Small Cell Lung Cancer	ATC Class - L01X - Other antineoplastic agents in atc	Advanced Cancer		2020-01-01	2016-05-01	BMS-986205, Dasatinib, Ipilimumab, Nivolumab, Relatlimab	linrodostat, bms 986205, bms-986205, f 001287, f-001287, ono 7701, ono-7701, dasatinib, bms-354825, bms-354825 hydrate, bms-354825-03, dasatinib hydrate, dasatinib monohydrate, sprycel, ipilimumab, bms-734016, mdx-010, mdx-010 mdx-ctla4, mdx-101, mdx-ctla-4, yervoy, nivolumab, bms-936558, bms-986298, mdx-1106, ono-4538, opdivo, relatlimab, bms-986016	1	NCT02750514	Phase 2	Phase 2	Compound id 233043 - LINRODOSTAT,Compound id 501089 - DASATINIB,Compound id 2729519 - IPILIMUMAB,Compound id 2741388 - NIVOLUMAB,Compound id 2801980 - RELATLIMAB
Study of BMS-354825 in Subjects With CML Who Are Resistant to or Intolerant of Imatinib or Ph+All in Japan	ATC Class - L01X - Other antineoplastic agents in atc	Chronic Myelogenous Leukemia		2007-03-01	2005-07-01	Dasatinib, Dasatinib, Dasatinib, Dasatinib, Dasatinib, Dasatinib	dasatinib, bms-354825, bms-354825 hydrate, bms-354825-03, dasatinib hydrate, dasatinib monohydrate, sprycel	1	NCT00337454	Phase 1	Phase 1	Compound id 501089 - DASATINIB
A Study of Dasatinib in Chronic Phase Philadelphia Chromosome Positive Chronic Myeloid Leukemia	ATC Class - L01X - Other antineoplastic agents in atc	Myeloid Leukemia, Chronic		2009-05-01	2007-05-01	Dasatinib, dasatinib	dasatinib, bms-354825, bms-354825 hydrate, bms-354825-03, dasatinib hydrate, dasatinib monohydrate, sprycel	1	NCT00482703	Phase 1	Phase 1	Compound id 501089 - DASATINIB
Randomized Study Comparing the Effect of Dasatinib and Imatinib on Malignant Stem Cells in Chronic Myeloid Leukemia	ATC Class - L01X - Other antineoplastic agents in atc	Chronic Myeloid Leukemia		2015-12-01	2009-03-01	Dasatinib, Imatinib	dasatinib, bms-354825, bms-354825 hydrate, bms-354825-03, dasatinib hydrate, dasatinib monohydrate, sprycel, imatinib, gleevec, sti-571	1	NCT00852566	Phase 2	Phase 2	Compound id 501089 - DASATINIB,Compound id 713353 - IMATINIB
A Study of Dasatinib, Cetuximab and Radiation With or Without Cisplatin in HNSCC	ATC Class - L01X - Other antineoplastic agents in atc,ATC Class - B02B - Vitamin k and other hemostatics	Head and Neck Cancer		2016-02-01	2009-07-01	Cetuximab, Cisplatin, Dasatinib, Radiation Therapy	dasatinib, bms-354825, bms-354825 hydrate, bms-354825-03, dasatinib hydrate, dasatinib monohydrate, sprycel, cisplatin, cisplatinum, cis-diamminedichloroplatinum(ii), cis-ddp, cis-platinum ii, int-230-6 component cisplatin, int230-6 component cisplatin, liplacis, nsc-119875, platinol-aq, platinol, cetuximab, abp-494, c-225, c225, cetuximab (genetical recombination), cmab-009, cmab009, erbitux, im…	1	NCT00882583	Phase 1	Phase 1	Compound id 501089 - DASATINIB,Compound id 2685970 - CISPLATIN,Compound id 2689082 - CETUXIMAB
Dasatinib in Treating Patients With Chronic Myelogenous Leukemia or Acute Lymphoblastic Leukemia	ATC Class - L01X - Other antineoplastic agents in atc	Leukemia		null	2005-11-01	dasatinib	dasatinib, bms-354825, bms-354825 hydrate, bms-354825-03, dasatinib hydrate, dasatinib monohydrate, sprycel	1	NCT00345826	Phase 1	Phase 1	Compound id 501089 - DASATINIB
A Phase I Dose Escalation Combination Study in Patients With Chronic Myelogenous Leukemia (CML) and Philadelphia Chromosome-Positive (Ph+) Acute Lymphoblastic Leukemia (ALL)(0457-009)(TERMINATED)	ATC Class - L01X - Other antineoplastic agents in atc	Chronic Myelogenous Leukemia, Leukemia, Lymphoblastic, Acute, Philadelphia-Positive		2007-11-01	2007-10-01	MK0457, dasatinib	dasatinib, bms-354825, bms-354825 hydrate, bms-354825-03, dasatinib hydrate, dasatinib monohydrate, sprycel	1	NCT00500006	Phase 1	Phase 1	Compound id 501089 - DASATINIB
Dasatinib and Crizotinib in Advanced Cancer	ATC Class - L01X - Other antineoplastic agents in atc	Advanced Cancers		2019-03-01	2013-03-01	Crizotinib, Dasatinib	crizotinib, pf-2341066, pf-02341066, xalkori, dasatinib, bms-354825, bms-354825 hydrate, bms-354825-03, dasatinib hydrate, dasatinib monohydrate, sprycel	1	NCT01744652	Phase 1	Phase 1	Compound id 259783 - CRIZOTINIB,Compound id 501089 - DASATINIB
Dasatinib and Gemcitabine Hydrochloride or Gemcitabine Hydrochloride Alone in Treating Patients With Pancreatic Cancer Previously Treated With Surgery	ATC Class - L01X - Other antineoplastic agents in atc,ATC Class - L01B - Antimetabolites	Acinar Cell Adenocarcinoma of the Pancreas, Duct Cell Adenocarcinoma of the Pancreas, Recurrent Pancreatic Cancer, Stage IA Pancreatic Cancer, Stage IB Pancreatic Cancer, Stage IIA Pancreatic Cancer, Stage IIB Pancreatic Cancer, Stage III Pancreatic Cancer		2017-11-01	2011-01-01	dasatinib, gemcitabine hydrochloride, immunohistochemistry staining method, laboratory biomarker analysis, mutation analysis, nucleic acid sequencing	dasatinib, bms-354825, bms-354825 hydrate, bms-354825-03, dasatinib hydrate, dasatinib monohydrate, sprycel, gemcitabine, gemzar, ly-188011, ly188011, nsc-613327, gemcitabine hydrochloride, infugem, ly-188011 hydrochloride, ly188011 hydrochloride	1	NCT01234935	Phase 2	Phase 2	Compound id 501089 - DASATINIB,Compound id 1072154 - GEMCITABINE,Compound id 1134085 - GEMCITABINE HYDROCHLORIDE
Clinical Trial of BP1001 (Liposomal Grb2 Antisense Oligonucleotide) in Combination With Dasatinib in Patients With Ph + CML Who Have Failed TKI, Ph+ AML, Ph+ MDS	ATC Class - L01X - Other antineoplastic agents in atc	Acute Myeloid Leukemia, Chronic Myelogenous Leukemia, Ph1-Positive, Myelodysplastic Syndrome		2020-05-01	2017-09-01	BP1001 (fixed dose), BP1001 (varying dose), Dasatinib	dasatinib, bms-354825, bms-354825 hydrate, bms-354825-03, dasatinib hydrate, dasatinib monohydrate, sprycel	1	NCT02923986	Phase 1	Phase 1	Compound id 501089 - DASATINIB
Cetuximab and Dasatinib in Recurrent Squamous Cell Carcinoma	ATC Class - L01X - Other antineoplastic agents in atc	Squamous Cell Carcinoma Of The Head And Neck		2016-08-01	2011-09-01	Cetuximab, Dasatinib	dasatinib, bms-354825, bms-354825 hydrate, bms-354825-03, dasatinib hydrate, dasatinib monohydrate, sprycel, cetuximab, abp-494, c-225, c225, cetuximab (genetical recombination), cmab-009, cmab009, erbitux, imc-225, imc-c225, moab c225	1	NCT01488318	Phase 2	Phase 2	Compound id 501089 - DASATINIB,Compound id 2689082 - CETUXIMAB
Dasatinib Holiday for Improved Tolerability	ATC Class - L01X - Other antineoplastic agents in atc	Myeloid Leukemia, Chronic		2023-03-01	2016-08-01	dasatinib (SPRYCEL)	dasatinib, bms-354825, bms-354825 hydrate, bms-354825-03, dasatinib hydrate, dasatinib monohydrate, sprycel	1	NCT02890784	Phase 3	Phase 3	Compound id 501089 - DASATINIB
Adding Ruxolitinib to a Combination of Dasatinib Plus Dexamethasone in Remission Induction Therapy in Newly Diagnosed Philadelphia Chromosome-Positive Acute Lymphoblastic Leukemia Patients Aged 40 Years or Older	ATC Class - R01A - Decongestants and other nasal preparations for topical use,ATC Class - A01A - Stomatological preparations,ATC Class - S01B - Antiinflammatory agents, ophthalmologic,ATC Class - S03B - Corticosteroid ophthalmologic and otologic preparations,ATC Class - D07A - Corticosteroid dermatological preparations, plain,ATC Class - D10A - Anti-acne preparations for topical use,ATC Class - C…	Acute Lymphoblastic Leukemia		2023-06-01	2015-06-01	Dasatinib, Dexamethasone, Ruxolitinib	dasatinib, bms-354825, bms-354825 hydrate, bms-354825-03, dasatinib hydrate, dasatinib monohydrate, sprycel, dexamethasone, decadron-la, dexacen-4, dexacort, dexair, mymethasone, neodecadron, dalalone, kortico injection, aeroseb-dex, decaderm, decadron-75, decaspray, dexacortisyl, dexafree, dexamethasone intensol, dexamethasone metasulfobenzoate sodium, dexamethasone palmitate, dexamethasone vale…	1	NCT02494882	Phase 1	Phase 1	Compound id 501089 - DASATINIB,Compound id 1903831 - DEXAMETHASONE,Compound id 1406851 - RUXOLITINIB
Nivolumab and Dasatinib in Treating Patients With Relapsed or Refractory Philadelphia Chromosome Positive Acute Lymphoblastic Leukemia	ATC Class - L01X - Other antineoplastic agents in atc	B Acute Lymphoblastic Leukemia With t(9;22)(q34;q11.2); BCR-ABL1, Recurrent Adult Acute Lymphoblastic Leukemia, Recurrent Childhood Acute Lymphoblastic Leukemia, Refractory Adult Acute Lymphoblastic Leukemia, Refractory Childhood Acute Lymphoblastic Leukemia		2018-08-01	2017-08-01	Dasatinib, Laboratory Biomarker Analysis, Nivolumab, Pharmacological Study	dasatinib, bms-354825, bms-354825 hydrate, bms-354825-03, dasatinib hydrate, dasatinib monohydrate, sprycel, nivolumab, bms-936558, bms-986298, mdx-1106, ono-4538, opdivo	1	NCT02819804	Phase 1	Phase 1	Compound id 501089 - DASATINIB,Compound id 2741388 - NIVOLUMAB
Abiraterone Acetate and Prednisone With or Without Dasatinib in Treating Patients With Metastatic Hormone-Resistant Prostate Cancer	ATC Class - L01X - Other antineoplastic agents in atc,ATC Class - A07E - Intestinal antiinflammatory agents,ATC Class - H02A - Corticosteroids for systemic use, plain,ATC Class - L02B - Hormone antagonists and related agents,ATC Class - V07A - All other non-therapeutic products	Hormone-resistant Prostate Cancer, Recurrent Prostate Cancer, Stage IV Prostate Cancer		2018-03-01	2012-09-01	abiraterone acetate, dasatinib, prednisone	abiraterone acetate, cb-7630, cb7630, yonsa, zytiga, dasatinib, bms-354825, bms-354825 hydrate, bms-354825-03, dasatinib hydrate, dasatinib monohydrate, sprycel, prednisone, sterapred, cortan, cortancyl, decortisyl, delta-dome, deltasone, fernisone, liquid pred, lodotra, meticorten, nsc-10023, orasone, paracort, prednicen-m, prednisone intensol, prednisone tablets, rayos, servisone, abiraterone, …	1	NCT01685125	Phase 2	Phase 2	Compound id 153054 - ABIRATERONE ACETATE,Compound id 501089 - DASATINIB,Compound id 1688535 - PREDNISONE,Compound id 1722972 - ABIRATERONE
Combination Chemotherapy With or Without Donor Stem Cell Transplant in Treating Patients With Acute Lymphoblastic Leukemia	ATC Class - R01A - Decongestants and other nasal preparations for topical use,ATC Class - A01A - Stomatological preparations,ATC Class - S01B - Antiinflammatory agents, ophthalmologic,ATC Class - S03B - Corticosteroid ophthalmologic and otologic preparations,ATC Class - D07A - Corticosteroid dermatological preparations, plain,ATC Class - D10A - Anti-acne preparations for topical use,ATC Class - C…	Acute Lymphoblastic Leukemia, Adult B Acute Lymphoblastic Leukemia, Adult B Acute Lymphoblastic Leukemia With t(9;22)(q34.1;q11.2); BCR-ABL1, Adult L1 Acute Lymphoblastic Leukemia, Adult L2 Acute Lymphoblastic Leukemia, Adult T Acute Lymphoblastic Leukemia, Recurrent Adult Acute Lymphoblastic Leukemia		null	2009-09-01	Allogeneic Hematopoietic Stem Cell Transplantation, Cyclophosphamide, Cytarabine, Dasatinib, Dexamethasone, Doxorubicin Hydrochloride, Etoposide, Filgrastim, Laboratory Biomarker Analysis, Leucovorin Calcium, Methotrexate, Methylprednisolone, Peripheral Blood Stem Cell Transplantation, Prednisone, Sirolimus, Tacrolimus, Total-Body Irradiation, Vincristine Sulfate	cyclophosphamide, b-518, cyclophosphamide anhydrous, cyclophosphamide hydrate, cyclophosphamide monohydrate, cytoxan (lyophilized), cytoxan, endoxana, lyophilized cytoxan, neosar, nsc-26271, cytarabine, tarabine pfs, alexan, alexan 100, ara-cytidine, arabinosyl cytosine, cytosar, cytosar-u, depocyte, depocyt, nsc-287459, u-19,920, u-19920, methotrexate, abitrexate, folex, mexate, mexate-aq, trexa…	1	NCT00792948	Phase 2	Phase 2	Compound id 51794 - CYCLOPHOSPHAMIDE,Compound id 95279 - CYTARABINE,Compound id 490791 - METHOTREXATE,Compound id 501089 - DASATINIB,Compound id 1903831 - DEXAMETHASONE,Compound id 570936 - LEUCOVORIN,Compound id 1791601 - METHYLPREDNISOLONE,Compound id 632578 - LEUCOVORIN CALCIUM,Compound id 791569 - DOXORUBICIN,Compound id 826096 - DOXORUBICIN HYDROCHLORIDE,Compound id 866156 - ETOPOSIDE,Compou…
Dasatinib Combined With Chemotherapy in Philadelphia Chromosome-positive Acute Lymphoblastic Leukemia	ATC Class - R01A - Decongestants and other nasal preparations for topical use,ATC Class - A01A - Stomatological preparations,ATC Class - S01B - Antiinflammatory agents, ophthalmologic,ATC Class - S03B - Corticosteroid ophthalmologic and otologic preparations,ATC Class - D07A - Corticosteroid dermatological preparations, plain,ATC Class - D10A - Anti-acne preparations for topical use,ATC Class - C…	Acute,Leukemia, Lymphoid		2021-12-01	2015-08-01	Dasatinib, allogeneic hematopoietic stem cell transplantation, autologous hematopoietic stem cell transplantation, cyclophosphamide, cytarabine, daunorubicin, dexamethasone, etoposide, mercaptopurine, methotrexate, mitoxantrone, prednisone, vincristine	mercaptopurine, 6-mercaptopurine, 6-mercaptopurine monohydrate, mercaptopurine anhydrous, mercaptopurine hydrate, nsc-755, puri-nethol, purixan, purinethol, xaluprine, cyclophosphamide, b-518, cyclophosphamide anhydrous, cyclophosphamide hydrate, cyclophosphamide monohydrate, cytoxan (lyophilized), cytoxan, endoxana, lyophilized cytoxan, neosar, nsc-26271, cytarabine, tarabine pfs, alexan, alexan…	1	NCT02523976	Phase 2	Phase 2	Compound id 3227 - MERCAPTOPURINE,Compound id 51794 - CYCLOPHOSPHAMIDE,Compound id 95279 - CYTARABINE,Compound id 404639 - MITOXANTRONE,Compound id 490791 - METHOTREXATE,Compound id 501089 - DASATINIB,Compound id 1903831 - DEXAMETHASONE,Compound id 761015 - DAUNORUBICIN,Compound id 866156 - ETOPOSIDE,Compound id 986271 - VINCRISTINE,Compound id 1688535 - PREDNISONE
Study of Dasatinib and Docetaxel in Metastatic Hormone Refractory Prostate Cancer	ATC Class - L01X - Other antineoplastic agents in atc,ATC Class - L01C - Plant alkaloids and other natural products, antineoplastic drugs	Metastatic Prostate Cancer		2013-01-01	2007-07-01	Dasatinib, Docetaxel	dasatinib, bms-354825, bms-354825 hydrate, bms-354825-03, dasatinib hydrate, dasatinib monohydrate, sprycel, docetaxel, bind 014, ckd-810, docefrez, docetaxel anhydrous, docetaxel hydrate, docetaxel trihydrate, nsc-628503, rp 56976, rp-56976, taxceus, taxotere, xrp6976	1	NCT00439270	Phase 1	Phase 1	Compound id 501089 - DASATINIB,Compound id 990319 - DOCETAXEL
Combination Chemotherapy and Dasatinib in Treating Participants With Philadelphia Positive or BCR-ABL Positive Acute Lymphoblastic Leukemia.	ATC Class - R01A - Decongestants and other nasal preparations for topical use,ATC Class - A01A - Stomatological preparations,ATC Class - S01B - Antiinflammatory agents, ophthalmologic,ATC Class - S03B - Corticosteroid ophthalmologic and otologic preparations,ATC Class - D07A - Corticosteroid dermatological preparations, plain,ATC Class - D10A - Anti-acne preparations for topical use,ATC Class - C…	Acute Lymphoblastic Leukemia, BCR-ABL1 Fusion Protein Expression, Blast Phase Chronic Myelogenous Leukemia, BCR-ABL1 Positive, Philadelphia Chromosome Positive, Recurrent Acute Lymphoblastic Leukemia, t(9;22)		2023-08-01	2006-09-01	Cyclophosphamide, Cytarabine, Dasatinib, Dexamethasone, Doxorubicin, Methotrexate, Prednisone, Vincristine	cyclophosphamide, b-518, cyclophosphamide anhydrous, cyclophosphamide hydrate, cyclophosphamide monohydrate, cytoxan (lyophilized), cytoxan, endoxana, lyophilized cytoxan, neosar, nsc-26271, cytarabine, tarabine pfs, alexan, alexan 100, ara-cytidine, arabinosyl cytosine, cytosar, cytosar-u, depocyte, depocyt, nsc-287459, u-19,920, u-19920, methotrexate, abitrexate, folex, mexate, mexate-aq, trexa…	1	NCT00390793	Phase 2	Phase 2	Compound id 51794 - CYCLOPHOSPHAMIDE,Compound id 95279 - CYTARABINE,Compound id 490791 - METHOTREXATE,Compound id 501089 - DASATINIB,Compound id 1903831 - DEXAMETHASONE,Compound id 791569 - DOXORUBICIN,Compound id 986271 - VINCRISTINE,Compound id 1688535 - PREDNISONE
Study of Chemotherapy-Free Induction Regimen for Ph+ Acute Lymphoblastic Leukemia With Inotuzumab Ozogamicin (InO)	ATC Class - R01A - Decongestants and other nasal preparations for topical use,ATC Class - A01A - Stomatological preparations,ATC Class - S01B - Antiinflammatory agents, ophthalmologic,ATC Class - S03B - Corticosteroid ophthalmologic and otologic preparations,ATC Class - D07A - Corticosteroid dermatological preparations, plain,ATC Class - D10A - Anti-acne preparations for topical use,ATC Class - C…	Acute Lymphoblastic Leukemia, Lymphoblastic Leukemia, ph+ Acute Lymphoblastic Leukemia		2026-05-01	2021-03-01	Allogenic Stem Cell Transplantation, Dasatinib, Dexamethasone, Inotuzumab ozogamicin, Methotrexate, Methotrexate for Injection, Ponatinib, Vincristine	methotrexate, abitrexate, folex, mexate, mexate-aq, trexall, amethopterin, tcmdc-123832, tcmdc-125488, tcmdc-125858, adx-2191, cl 14377, cl-14377, ebetrex, emt-25299, emtexate high-pot, emtexate pf, maxtrex, methylaminopterin, metoject, nsc-740, otrexup, otrexup pfs, r-9985, r-methotrexate, rasuvo, reditrex, rheumatrex, zlatal, dasatinib, bms-354825, bms-354825 hydrate, bms-354825-03, dasatinib h…	1	NCT04747912	Phase 2	Phase 2	Compound id 490791 - METHOTREXATE,Compound id 501089 - DASATINIB,Compound id 1903831 - DEXAMETHASONE,Compound id 801073 - PONATINIB,Compound id 986271 - VINCRISTINE,Compound id 2740714 - OZOGAMICIN,Compound id 2741260 - INOTUZUMAB OZOGAMICIN,Compound id 2817475 - INOTUZUMAB
A Study Using Two Oral Chemotherapy Agents for Chronic Lymphocytic Leukemia	ATC Class - L01X - Other antineoplastic agents in atc,ATC Class - L04A - Immunosuppressants	Chronic Lymphocytic Leukemia, Leukemia		2016-03-01	2009-01-01	dasatinib and lenalidomide	dasatinib, bms-354825, bms-354825 hydrate, bms-354825-03, dasatinib hydrate, dasatinib monohydrate, sprycel, lenalidomide, cc-5013, cdc-501, revlimid, syp-1512	1	NCT00829647	Phase 1	Phase 1	Compound id 501089 - DASATINIB,Compound id 1113909 - LENALIDOMIDE
Dasatinib for the Treatment of Moderate and Severe COVID-19	ATC Class - L01X - Other antineoplastic agents in atc	Symptomatic COVID-19 Infection Laboratory-Confirmed	covid19, covid-19, coronavirus	2024-12-01	2021-12-01	Dasatinib Anhydrous, Placebo Administration	dasatinib, bms-354825, bms-354825 hydrate, bms-354825-03, dasatinib hydrate, dasatinib monohydrate, sprycel, tezacitabine, fmd-c, kw-2331, mdl-101731	1	NCT04830735	Phase 2	Phase 2	Compound id 501089 - DASATINIB,Compound id 1099615 - TEZACITABINE
Randomized Phase II Trial of Letrozole With or Without Dasatinib as First and Second-line Treatment for Hormone Receptor-positive, HER2-negative Post-menopausal Breast Cancer That is Unresectable, Locally Recurrent or Metastatic	ATC Class - L02B - Hormone antagonists and related agents,ATC Class - L01X - Other antineoplastic agents in atc	Metastatic Breast Cancer		2014-06-01	2008-08-01	Dasatinib, Letrozole	dasatinib, bms-354825, bms-354825 hydrate, bms-354825-03, dasatinib hydrate, dasatinib monohydrate, sprycel, letrozole, cgs 20267, cgs-20267, femara	1	NCT00696072	Phase 2	Phase 2	Compound id 501089 - DASATINIB,Compound id 1321721 - LETROZOLE
Rollover Study of BMS-354825 in Patients With CML and Ph+ALL	ATC Class - L01X - Other antineoplastic agents in atc	Chronic Myelogenous Leukemia, Philadelphia Chromosome Positive Acute Lymphoblastic Leukemia		2009-06-01	2006-01-01	dasatinib	dasatinib, bms-354825, bms-354825 hydrate, bms-354825-03, dasatinib hydrate, dasatinib monohydrate, sprycel	1	NCT01030718	Phase 1	Phase 1	Compound id 501089 - DASATINIB
Dasatinib In Combination With Weekly Paclitaxel For Patients With Metastatic Breast Carcinoma CA 180 194	ATC Class - L01X - Other antineoplastic agents in atc,ATC Class - L01C - Plant alkaloids and other natural products, antineoplastic drugs	Breast Cancer		2018-08-01	2009-01-01	Dasatinib and Paclitaxel	dasatinib, bms-354825, bms-354825 hydrate, bms-354825-03, dasatinib hydrate, dasatinib monohydrate, sprycel, paclitaxel, abi-007, abi-007 component paclitaxel, abraxane, bms 181339-01, bms-181339-01, dhp 107, dhp-107, mbt 0206, mbt-0206, nk 105, nk-105, nsc-125973, pacitaxel, paxene, qw-8184, taxol, taxol 100	1	NCT00820170	Phase 1	Phase 1	Compound id 501089 - DASATINIB,Compound id 991478 - PACLITAXEL
Window of Opportunity Trial of Dasatinib in Operable Triple Negative Breast Cancers With nEGFR	ATC Class - L01X - Other antineoplastic agents in atc	Breast Neoplasms, Triple Negative Breast Neoplasms		2022-07-01	2017-05-01	Conventional Surgery, Dasatinib, Laboratory Biomarker Analysis	dasatinib, bms-354825, bms-354825 hydrate, bms-354825-03, dasatinib hydrate, dasatinib monohydrate, sprycel	1	NCT02720185	Phase 2	Phase 2	Compound id 501089 - DASATINIB
A Study of TKI Maintenance Therapy Following Allo-HSCT in Newly Diagnosed Ph+ Adult ALL	ATC Class - L01X - Other antineoplastic agents in atc	ALL, Adult, Philadelphia-Positive Acute Lymphoblastic Leukemia, Precursor Cell Lymphoblastic Leukemia-Lymphoma		2023-06-01	2021-09-01	Dasatinib	dasatinib, bms-354825, bms-354825 hydrate, bms-354825-03, dasatinib hydrate, dasatinib monohydrate, sprycel	1	NCT05024357	null		Compound id 501089 - DASATINIB
Dasatinib In Combination With Trastuzumab And Paclitaxel In First Line Treatment Of Her2-Positive MBC Patients	ATC Class - L01X - Other antineoplastic agents in atc,ATC Class - L01C - Plant alkaloids and other natural products, antineoplastic drugs	Metastatic Breast Cancer		2019-03-01	2011-07-01	Dasatinib, Paclitaxel, Trastuzumab	dasatinib, bms-354825, bms-354825 hydrate, bms-354825-03, dasatinib hydrate, dasatinib monohydrate, sprycel, paclitaxel, abi-007, abi-007 component paclitaxel, abraxane, bms 181339-01, bms-181339-01, dhp 107, dhp-107, mbt 0206, mbt-0206, nk 105, nk-105, nsc-125973, pacitaxel, paxene, qw-8184, taxol, taxol 100, trastuzumab, 4d5v8, abp 980, abp-980, dmb-3111 (trastuzumab biosimilar), eg-12014, eg12…	1	NCT01306942	Phase 1	Phase 1	Compound id 501089 - DASATINIB,Compound id 991478 - PACLITAXEL,Compound id 2689090 - TRASTUZUMAB
Genomics-Based Target Therapy for Children With Relapsed or Refractory Malignancy	ATC Class - L01X - Other antineoplastic agents in atc,ATC Class - L04A - Immunosuppressants,ATC Class - L01C - Plant alkaloids and other natural products, antineoplastic drugs,ATC Class - L01B - Antimetabolites,ATC Class - L01A - Alkylating agents,ATC Class - J07B - Viral vaccines	Refractory Pediatric AML, Refractory Pediatric Solid Tumor, Relapsed Pediatric AML, Relapsed Pediatric Solid Tumor		2023-12-01	2015-12-01	Axitinib, CancerSCAN, Carboplatin, Crizotinib, Cytarabine, Dasatinib, Erlotinib, Etoposide, Everolimus, Fludarabine, Ifosfamide, Imatinib, Pazopanib, Ruxolitinib, Sorafenib, Trastuzumab, Vandetanib, Vemurafenib	ifosfamide, ifsofamide, ifex, mitoxana, mjf 9325, mjf-9325, nsc-109724, z-4942, z4942, cytarabine, tarabine pfs, alexan, alexan 100, ara-cytidine, arabinosyl cytosine, cytosar, cytosar-u, depocyte, depocyt, nsc-287459, u-19,920, u-19920, erlotinib, osi-774, ro-508231, cp-358,774, cp-358774, cp-35877401, r-1415, rg-1415, tarceva, vandetanib, caprelsa, gnf-pf-2188, zd-64, zd-6474, zd6474, zactima, …	1	NCT02638428	Phase 2	Phase 2	Compound id 30136 - IFOSFAMIDE,Compound id 95279 - CYTARABINE,Compound id 141944 - ERLOTINIB,Compound id 233726 - VANDETANIB,Compound id 259783 - CRIZOTINIB,Compound id 340003 - PAZOPANIB,Compound id 429624 - SORAFENIB,Compound id 501089 - DASATINIB,Compound id 505877 - VEMURAFENIB,Compound id 713353 - IMATINIB,Compound id 866156 - ETOPOSIDE,Compound id 1012475 - EVEROLIMUS,Compound id 1179124 - …
A Study of Dasatinib (BMS-354825) in Patients With Advanced 'Triple-negative' Breast Cancer	ATC Class - L01X - Other antineoplastic agents in atc	Breast Cancer, Metastasis		2008-09-01	2006-12-01	Dasatinib, Dasatinib	dasatinib, bms-354825, bms-354825 hydrate, bms-354825-03, dasatinib hydrate, dasatinib monohydrate, sprycel	1	NCT00371254	Phase 2	Phase 2	Compound id 501089 - DASATINIB
Dasatinib (BMS-354825) in Subjects With Lymphoid Blast Phase Chronic Myeloid Leukemia or Philadelphia Chromosome Positive Acute Lymphoblastic Leukemia	ATC Class - L01X - Other antineoplastic agents in atc	Chronic Myeloid Leukemia, Leukemia, Lymphoblastic, Acute, Philadelphia-positive		2007-12-01	2005-01-01	Dasatinib	dasatinib, bms-354825, bms-354825 hydrate, bms-354825-03, dasatinib hydrate, dasatinib monohydrate, sprycel	1	NCT00101595	Phase 2	Phase 2	Compound id 501089 - DASATINIB
Total Therapy XVII for Newly Diagnosed Patients With Acute Lymphoblastic Leukemia and Lymphoma	ATC Class - L01X - Other antineoplastic agents in atc,ATC Class - R01A - Decongestants and other nasal preparations for topical use,ATC Class - A01A - Stomatological preparations,ATC Class - S01B - Antiinflammatory agents, ophthalmologic,ATC Class - S03B - Corticosteroid ophthalmologic and otologic preparations,ATC Class - D07A - Corticosteroid dermatological preparations, plain,ATC Class - D10A …	Acute Lymphoblastic Leukemia, Acute Lymphoblastic Lymphoma		2028-03-01	2017-03-01	Blinatumomab, Bortezomib, Clofarabine, Cyclophosphamide, Cytarabine, Dasatinib, Daunorubicin, Dexamethasone, Doxorubicin, Erwinase, Etoposide, Idarubicin, Mercaptopurine, Methotrexate, Nelarabine, Pegaspargase, Prednisone, Ruxolitinib, Thioguanine, Vincristine, Vorinostat	mercaptopurine, 6-mercaptopurine, 6-mercaptopurine monohydrate, mercaptopurine anhydrous, mercaptopurine hydrate, nsc-755, puri-nethol, purixan, purinethol, xaluprine, cyclophosphamide, b-518, cyclophosphamide anhydrous, cyclophosphamide hydrate, cyclophosphamide monohydrate, cytoxan (lyophilized), cytoxan, endoxana, lyophilized cytoxan, neosar, nsc-26271, thioguanine, tabloid, lanvis, nsc-752, n…	1	NCT03117751	Phase 2	Phase 2	Compound id 3227 - MERCAPTOPURINE,Compound id 51794 - CYCLOPHOSPHAMIDE,Compound id 78895 - THIOGUANINE,Compound id 95279 - CYTARABINE,Compound id 490791 - METHOTREXATE,Compound id 501089 - DASATINIB,Compound id 1903831 - DEXAMETHASONE,Compound id 680120 - IDARUBICIN,Compound id 761015 - DAUNORUBICIN,Compound id 791569 - DOXORUBICIN,Compound id 866156 - ETOPOSIDE,Compound id 986271 - VINCRISTINE,C…
Dasatinib With Fludarabine and Rituximab in Relapsed and Refractory CLL and SLL	ATC Class - L01X - Other antineoplastic agents in atc,ATC Class - L01B - Antimetabolites	Chronic Lymphocytic Leukemia, Small Lymphocytic Lymphoma		2015-01-01	2010-07-01	Rituximab, dasatinib, fludarabine	dasatinib, bms-354825, bms-354825 hydrate, bms-354825-03, dasatinib hydrate, dasatinib monohydrate, sprycel, fludarabine, 2-fluoro-ara-a, fludarabine phosphate impurity, 2-fluoro-ara-adenine-, nsc-118218, nsc-118218h, rituximab, abp-798, abp798, ct-p10, hs-006, hs-006 (rituximab biosimilar), hs006, idec-102, idec-c2b8, mabthera, mabthera rituxan, r-105 idec-102, rg-105, rhcacd20ma, rituximab (gen…	1	NCT01173679	Phase 2	Phase 2	Compound id 501089 - DASATINIB,Compound id 1179124 - FLUDARABINE,Compound id 2689081 - RITUXIMAB
Metabolic Outcomes in Patients Receiving Tyrosine Kinase Inhibitor (TKI) Therapy With Dasatinib or Nilotinib	ATC Class - L01X - Other antineoplastic agents in atc	Chronic Myeloid Leukemia (CML)		2016-03-01	2015-12-01	dasatinib, nilotinib	dasatinib, bms-354825, bms-354825 hydrate, bms-354825-03, dasatinib hydrate, dasatinib monohydrate, sprycel, nilotinib, amn 107, amn-107, amn107, tasigna	1	NCT02733445	null		Compound id 501089 - DASATINIB,Compound id 794721 - NILOTINIB
Neoadjuvant Dasatinib and Radical Cystectomy for Transitional Cell Carcinoma of the Bladder	ATC Class - L01X - Other antineoplastic agents in atc	Transitional Cell Carcinoma of the Bladder		2012-12-01	2008-06-01	Dasatinib, Radical Cystectomy	dasatinib, bms-354825, bms-354825 hydrate, bms-354825-03, dasatinib hydrate, dasatinib monohydrate, sprycel	1	NCT00706641	null		Compound id 501089 - DASATINIB
Induction Therapy With Cytarabine, High-Dose Mitoxantrone and Dasatinib for Patients With Philadelphia-Chromosome Positive (Ph+) Acute Lymphoblastic Leukemia	ATC Class - L01X - Other antineoplastic agents in atc,ATC Class - L01D - Cytotoxic antibiotics and related substances,ATC Class - L01B - Antimetabolites	Acute Lymphoblastic Leukemia, Leukemia		2014-04-01	2009-07-01	Dasatinib, Mitoxantrone, Cytarabine	cytarabine, tarabine pfs, alexan, alexan 100, ara-cytidine, arabinosyl cytosine, cytosar, cytosar-u, depocyte, depocyt, nsc-287459, u-19,920, u-19920, mitoxantrone, novantrone, mitoxantrone hcl, nsc-279836, dasatinib, bms-354825, bms-354825 hydrate, bms-354825-03, dasatinib hydrate, dasatinib monohydrate, sprycel	1	NCT00940524	Phase 1	Phase 1	Compound id 95279 - CYTARABINE,Compound id 404639 - MITOXANTRONE,Compound id 501089 - DASATINIB
Chronic Myelogenous Leukemia (CML) - Follow on: Study of BMS-354825 in Subjects With CML	ATC Class - L01X - Other antineoplastic agents in atc	Myeloid Leukemia, Chronic, Chronic-Phase		2014-07-01	2005-07-01	dasatinib, dasatinib, dasatinib, dasatinib	dasatinib, bms-354825, bms-354825 hydrate, bms-354825-03, dasatinib hydrate, dasatinib monohydrate, sprycel	1	NCT00123474	Phase 3	Phase 3	Compound id 501089 - DASATINIB
Dasatinib in Patients With Chronic Myeloid Leukemia in Chronic Phase	ATC Class - L01X - Other antineoplastic agents in atc	Chronic Myeloid Leukemia		2016-12-01	2013-03-01	Dasatinib	dasatinib, bms-354825, bms-354825 hydrate, bms-354825-03, dasatinib hydrate, dasatinib monohydrate, sprycel	1	NCT01802450	Phase 2	Phase 2	Compound id 501089 - DASATINIB
Trial of Dasatinib Plus Ixabepilone in 2nd or 3rd Line Metastatic Breast Cancer	ATC Class - L01X - Other antineoplastic agents in atc,ATC Class - L01D - Cytotoxic antibiotics and related substances	Metastatic Breast Cancer		2013-10-01	2009-06-01	Dasatinib, Ixabepilone	dasatinib, bms-354825, bms-354825 hydrate, bms-354825-03, dasatinib hydrate, dasatinib monohydrate, sprycel, ixabepilone, ixempra, bms 247550-01, bms-247550, bms-247550-01, ixempra kit	1	NCT00924352	Phase 1	Phase 1	Compound id 501089 - DASATINIB,Compound id 632492 - IXABEPILONE
Early Conversion of Dasatinib in CML-CP Patients	ATC Class - L01X - Other antineoplastic agents in atc	Validity and Safety		2021-12-01	2019-10-01	Dasatinib 100 MG	dasatinib, bms-354825, bms-354825 hydrate, bms-354825-03, dasatinib hydrate, dasatinib monohydrate, sprycel	1	NCT04136015	null		Compound id 501089 - DASATINIB
Safety Evaluation of Dasatinib in Subjects With Scleroderma Pulmonary Fibrosis	ATC Class - L01X - Other antineoplastic agents in atc	Scleroderma		2011-04-01	2009-01-01	dasatinib	dasatinib, bms-354825, bms-354825 hydrate, bms-354825-03, dasatinib hydrate, dasatinib monohydrate, sprycel	1	NCT00764309	Phase 1	Phase 1	Compound id 501089 - DASATINIB
Personalized Treatment Selection for Metastatic Breast Cancer	ATC Class - L01X - Other antineoplastic agents in atc	Breast Cancer		2014-05-01	2009-06-01	AZD6244, Dasatinib	dasatinib, bms-354825, bms-354825 hydrate, bms-354825-03, dasatinib hydrate, dasatinib monohydrate, sprycel, selumetinib, arry-142886, arry-886, azd-6244, azd6244, koselugo	1	NCT00780676	Phase 2	Phase 2	Compound id 501089 - DASATINIB,Compound id 1897397 - SELUMETINIB
Efficacy and Safety of TKIs' Withdrawal After a Two-step Dose Reduction in Patients With Chronic Myeloid Leukemia	ATC Class - L01X - Other antineoplastic agents in atc	Chronic Myeloid Leukemia, Chronic Phase, Withdrawal;Drug		2024-12-01	2020-06-01	Dasatinib, Imatinib withdrawal, Nilotinib	dasatinib, bms-354825, bms-354825 hydrate, bms-354825-03, dasatinib hydrate, dasatinib monohydrate, sprycel, imatinib, gleevec, sti-571, nilotinib, amn 107, amn-107, amn107, tasigna	1	NCT04147533	Phase 2	Phase 2	Compound id 501089 - DASATINIB,Compound id 713353 - IMATINIB,Compound id 794721 - NILOTINIB
Pharmacokinetic Study Comparing Blood Levels of Dasatinib in Healthy Participants Who Received the Tablet Formulation With Those Who Received Liquid and Tablet-dispersed Formulations	ATC Class - L01X - Other antineoplastic agents in atc,ATC Class - V07A - All other non-therapeutic products	Pharmacokinetic Study in Healthy Participants		2011-09-01	2011-07-01	Dasatinib as dispersed tablets, Dasatinib as liquid, Dasatinib as tablets	dasatinib, bms-354825, bms-354825 hydrate, bms-354825-03, dasatinib hydrate, dasatinib monohydrate, sprycel	1	NCT01392703	Phase 1	Phase 1	Compound id 501089 - DASATINIB
A Study of Dasatinib Plus Reduced Intensive Consolidation Chemotherapy in Ph+ Adult ALL	ATC Class - L01X - Other antineoplastic agents in atc,ATC Class - L01C - Plant alkaloids and other natural products, antineoplastic drugs,ATC Class - L04A - Immunosuppressants,ATC Class - L01B - Antimetabolites,ATC Class - A07E - Intestinal antiinflammatory agents,ATC Class - H02A - Corticosteroids for systemic use, plain,ATC Class - V07A - All other non-therapeutic products	ALL, Adult, Philadelphia-Positive Acute Lymphoblastic Leukemia, Precursor Cell Lymphoblastic Leukemia-Lymphoma		2023-06-01	2021-09-01	dasatinib plus consolidation chemotherapy with high-dose methotrexate and cytarabine, dasatinib plus consolidation chemotherapy with vincristine and prednisone	cytarabine, tarabine pfs, alexan, alexan 100, ara-cytidine, arabinosyl cytosine, cytosar, cytosar-u, depocyte, depocyt, nsc-287459, u-19,920, u-19920, methotrexate, abitrexate, folex, mexate, mexate-aq, trexall, amethopterin, tcmdc-123832, tcmdc-125488, tcmdc-125858, adx-2191, cl 14377, cl-14377, ebetrex, emt-25299, emtexate high-pot, emtexate pf, maxtrex, methylaminopterin, metoject, nsc-740, ot…	1	NCT05026229	null		Compound id 95279 - CYTARABINE,Compound id 490791 - METHOTREXATE,Compound id 501089 - DASATINIB,Compound id 986271 - VINCRISTINE,Compound id 1688535 - PREDNISONE
Multimodal Molecular Targeted Therapy to Treat Relapsed or Refractory High-risk Neuroblastoma	ATC Class - L01X - Other antineoplastic agents in atc,ATC Class - S01X - Other ophthalmologicals in atc,ATC Class - L04A - Immunosuppressants,ATC Class - L01A - Alkylating agents	Neuroblastoma Recurrent		2020-09-01	2013-08-01	Dasatinib, Irinotecan, Irinotecan, Rapamycin, Temozolomide, Temozolomide	temozolomide, m&b-39831, ccrg-81045, m&b 39831, m-39831, nsc-362856, sch 52365, sch-52365, temodal, temomedac, temodar, dasatinib, bms-354825, bms-354825 hydrate, bms-354825-03, dasatinib hydrate, dasatinib monohydrate, sprycel, irinotecan, camptosar, sirolimus, ay-22989, l04aa10, nsc-226080, rapamycin, rapamune, sm-88 component sirolimus, wy-090217	1	NCT01467986	Phase 2	Phase 2	Compound id 27258 - TEMOZOLOMIDE,Compound id 501089 - DASATINIB,Compound id 881410 - IRINOTECAN,Compound id 997103 - SIROLIMUS
Blinatumomab and Tyrosine Kinase Inhibitor Therapy in People With Philadelphia Chromosome-Positive Acute Lymphoblastic Leukemia	ATC Class - L01X - Other antineoplastic agents in atc,ATC Class - R01A - Decongestants and other nasal preparations for topical use,ATC Class - A01A - Stomatological preparations,ATC Class - S01B - Antiinflammatory agents, ophthalmologic,ATC Class - S03B - Corticosteroid ophthalmologic and otologic preparations,ATC Class - D07A - Corticosteroid dermatological preparations, plain,ATC Class - D10A …	Acute Lymphoblastic Leukemia, Philadelphia Chromosome-Positive		2023-03-01	2020-03-01	Blinatumomab, dasatinib, dexamethasone, methotrexate	methotrexate, abitrexate, folex, mexate, mexate-aq, trexall, amethopterin, tcmdc-123832, tcmdc-125488, tcmdc-125858, adx-2191, cl 14377, cl-14377, ebetrex, emt-25299, emtexate high-pot, emtexate pf, maxtrex, methylaminopterin, metoject, nsc-740, otrexup, otrexup pfs, r-9985, r-methotrexate, rasuvo, reditrex, rheumatrex, zlatal, dasatinib, bms-354825, bms-354825 hydrate, bms-354825-03, dasatinib h…	1	NCT04329325	Phase 2	Phase 2	Compound id 490791 - METHOTREXATE,Compound id 501089 - DASATINIB,Compound id 1903831 - DEXAMETHASONE,Compound id 2728594 - BLINATUMOMAB
Safety Study of Dasatinib With Bortezomib (VelcadeÂ®) and Dexamethasone for Multiple Myeloma	ATC Class - R01A - Decongestants and other nasal preparations for topical use,ATC Class - A01A - Stomatological preparations,ATC Class - S01B - Antiinflammatory agents, ophthalmologic,ATC Class - S03B - Corticosteroid ophthalmologic and otologic preparations,ATC Class - D07A - Corticosteroid dermatological preparations, plain,ATC Class - D10A - Anti-acne preparations for topical use,ATC Class - C…	Multiple Myeloma		2011-02-01	2008-02-01	Bortezomib, Dasatinib, Dexamethasone	dasatinib, bms-354825, bms-354825 hydrate, bms-354825-03, dasatinib hydrate, dasatinib monohydrate, sprycel, dexamethasone, decadron-la, dexacen-4, dexacort, dexair, mymethasone, neodecadron, dalalone, kortico injection, aeroseb-dex, decaderm, decadron-75, decaspray, dexacortisyl, dexafree, dexamethasone intensol, dexamethasone metasulfobenzoate sodium, dexamethasone palmitate, dexamethasone vale…	1	NCT00560352	Phase 1	Phase 1	Compound id 501089 - DASATINIB,Compound id 1903831 - DEXAMETHASONE,Compound id 1901573 - BORTEZOMIB
Dasatinib in Treating Patients With Previously Treated Malignant Mesothelioma	ATC Class - L01X - Other antineoplastic agents in atc	Malignant Mesothelioma		2012-12-01	2007-08-01	dasatinib	dasatinib, bms-354825, bms-354825 hydrate, bms-354825-03, dasatinib hydrate, dasatinib monohydrate, sprycel	1	NCT00509041	Phase 2	Phase 2	Compound id 501089 - DASATINIB
Dasatinib in Combination With Revlimid (and Dexamethasone)	ATC Class - R01A - Decongestants and other nasal preparations for topical use,ATC Class - A01A - Stomatological preparations,ATC Class - S01B - Antiinflammatory agents, ophthalmologic,ATC Class - S03B - Corticosteroid ophthalmologic and otologic preparations,ATC Class - D07A - Corticosteroid dermatological preparations, plain,ATC Class - D10A - Anti-acne preparations for topical use,ATC Class - C…	Multiple Myeloma		2012-11-01	2008-05-01	Dasatinib, 100 mg + Lenalidomide, 20 mg + Dexamethasone, 40 mg, Dasatinib, 100 mg + Lenalidomide, 25 mg + Dexamethasone, 40 mg, Dasatinib, 140 mg + Lenalidomide, 25 mg + Dexamethasone, 40 mg, Dasatinib, 70 mg + Lenalidomide, 15 mg + Dexamethasone, 40 mg, Dasatinib, 70 mg + Lenalidomide, 20 mg + Dexamethasone, 40 mg	dasatinib, bms-354825, bms-354825 hydrate, bms-354825-03, dasatinib hydrate, dasatinib monohydrate, sprycel, dexamethasone, decadron-la, dexacen-4, dexacort, dexair, mymethasone, neodecadron, dalalone, kortico injection, aeroseb-dex, decaderm, decadron-75, decaspray, dexacortisyl, dexafree, dexamethasone intensol, dexamethasone metasulfobenzoate sodium, dexamethasone palmitate, dexamethasone vale…	1	NCT00560391	Phase 1	Phase 1	Compound id 501089 - DASATINIB,Compound id 1903831 - DEXAMETHASONE,Compound id 1113909 - LENALIDOMIDE
Safety And Efficacy Of TKI Cessation For CML Patients With Stable Molecular Response In A Real World Population	ATC Class - L01X - Other antineoplastic agents in atc	Chronic Myeloid Leukemia, Chronic Myeloid Leukemia in Remission, Chronic Myeloid Leukemia, BCR/ABL-Positive, in Remission		2023-11-01	2020-12-01	Imatinib Mesylate, Dasatinib, Nilotinib or Bosutinib Re-initiation, Imatinib Mesylate, Dasatinib, Nilotinib or Bosutinib Withdrawal	dasatinib, bms-354825, bms-354825 hydrate, bms-354825-03, dasatinib hydrate, dasatinib monohydrate, sprycel, bosutinib, bosulif, bosutinib monohydrate, sk-606, ski-606, imatinib, gleevec, sti-571, nilotinib, amn 107, amn-107, amn107, tasigna, imatinib mesilate, imatinib mesylate, glivec, imatinib methanesulfonate, qti-571, qti571, sti 571, sti571	1	NCT04626024	Phase 2	Phase 2	Compound id 501089 - DASATINIB,Compound id 679371 - BOSUTINIB,Compound id 713353 - IMATINIB,Compound id 794721 - NILOTINIB,Compound id 864374 - IMATINIB MESYLATE
Dendritic Cell Vaccines + Dasatinib for Metastatic Melanoma	ATC Class - L01X - Other antineoplastic agents in atc	Metastatic Melanoma		2019-07-01	2014-05-01	DC vaccine, Dasatinib	dasatinib, bms-354825, bms-354825 hydrate, bms-354825-03, dasatinib hydrate, dasatinib monohydrate, sprycel	1	NCT01876212	Phase 2	Phase 2	Compound id 501089 - DASATINIB
Chemotherapy With Liposomal Cytarabine CNS Prophylaxis for Adult Acute Lymphoblastic Leukemia & Lymphoblastic Lymphoma	ATC Class - A07A - Intestinal antiinfectives,ATC Class - D01A - Antifungals for topical use,ATC Class - G01A - Antiinfectives and antiseptics, excl. combinations with corticosteroids,ATC Class - L01X - Other antineoplastic agents in atc,ATC Class - D07X - Corticosteroids, other combinations,ATC Class - S01B - Antiinflammatory agents, ophthalmologic,ATC Class - S02B - Corticosteroid otologicals,AT…	Acute Lymphocytic Leukemia, Adult Lymphoblastic Lymphoma		2026-01-01	2014-01-01	AraC, CTX, DNR, Dasatinib, Etoposide, Hydrocortisone, LCV, Liposomal AraC, MTX, PEG-asp, Prednisone, Rituximab, VCR	dasatinib, bms-354825, bms-354825 hydrate, bms-354825-03, dasatinib hydrate, dasatinib monohydrate, sprycel, etoposide, etoposide resolution mixture, nsc-141540, toposar, vp-16-213, vepesid, prednisone, sterapred, cortan, cortancyl, decortisyl, delta-dome, deltasone, fernisone, liquid pred, lodotra, meticorten, nsc-10023, orasone, paracort, prednicen-m, prednisone intensol, prednisone tablets, ra…	1	NCT02043587	Phase 2	Phase 2	Compound id 501089 - DASATINIB,Compound id 866156 - ETOPOSIDE,Compound id 1688535 - PREDNISONE,Compound id 1721036 - HYDROCORTISONE,Compound id 2689081 - RITUXIMAB
Randomized Phase III Study of Intensive Chemotherapy With or Without Dasatinib (Sprycelâ¢)	ATC Class - L01X - Other antineoplastic agents in atc,ATC Class - L01D - Cytotoxic antibiotics and related substances,ATC Class - L01B - Antimetabolites	Acute Myeloid Leukemia (AML)		2024-02-01	2014-07-01	Cytarabine, Dasatinib, Daunorubicin, Idarubicin	cytarabine, tarabine pfs, alexan, alexan 100, ara-cytidine, arabinosyl cytosine, cytosar, cytosar-u, depocyte, depocyt, nsc-287459, u-19,920, u-19920, dasatinib, bms-354825, bms-354825 hydrate, bms-354825-03, dasatinib hydrate, dasatinib monohydrate, sprycel, idarubicin, idamycin, daunorubicin, cerubidine, daunoxome, epirubicin hydrochloride impurity, daunorubicin-, fi 6339, fi-6339, nsc-83142, r…	1	NCT02013648	Phase 3	Phase 3	Compound id 95279 - CYTARABINE,Compound id 501089 - DASATINIB,Compound id 680120 - IDARUBICIN,Compound id 761015 - DAUNORUBICIN
Study of Dasatinib in Combination With Everolimus for Children and Young Adults With Gliomas Harboring Platelet-Derived Growth Factor Receptor (PDGFR) Alterations	ATC Class - L01X - Other antineoplastic agents in atc,ATC Class - L04A - Immunosuppressants	Glioma, High Grade Glioma, Pontine Tumors		2019-05-01	2017-12-01	Dasatinib, Everolimus	dasatinib, bms-354825, bms-354825 hydrate, bms-354825-03, dasatinib hydrate, dasatinib monohydrate, sprycel, everolimus, afinitor, afinitor disperz, certican, rad 666, rad-001, rad-666, rad001, sdz-rad, votubia, zortress	1	NCT03352427	Phase 2	Phase 2	Compound id 501089 - DASATINIB,Compound id 1012475 - EVEROLIMUS
Dasatinib in Relapsed or Refractory Non-Hodgkin's Lymphoma	ATC Class - L01X - Other antineoplastic agents in atc	Non-Hodgkin's Lymphoma		2017-12-01	2007-09-01	Dasatinib, Dasatinib Maximum Tolerated Dose	dasatinib, bms-354825, bms-354825 hydrate, bms-354825-03, dasatinib hydrate, dasatinib monohydrate, sprycel	1	NCT00550615	Phase 1	Phase 1	Compound id 501089 - DASATINIB
Combination of Dasatinib and Peg-Interferon Alpha 2b in First Line for Chronic Myeloid Leukemia in Chronic Phase	ATC Class - L01X - Other antineoplastic agents in atc,ATC Class - S01A - Antiinfective ophthalmologics,ATC Class - L03A - Interferon	Chronic Phase of Chronic Myeloid Leukemia		2018-10-01	2013-10-01	Dasatinib, Peg-Interferon alpha2b	dasatinib, bms-354825, bms-354825 hydrate, bms-354825-03, dasatinib hydrate, dasatinib monohydrate, sprycel, interferon	1	NCT01872442	Phase 2	Phase 2	Compound id 501089 - DASATINIB,Compound id 2741143 - INTERFERON
Front-line Treatment of BCR-ABL+ Chronic Myeloid Leukemia (CML) With Dasatinib	ATC Class - L01X - Other antineoplastic agents in atc	Chronic Myeloid Leukemia		2021-12-01	2014-01-01	Dasatinib discontinuation	dasatinib, bms-354825, bms-354825 hydrate, bms-354825-03, dasatinib hydrate, dasatinib monohydrate, sprycel	1	NCT01761890	null		Compound id 501089 - DASATINIB
FOLFOX Chemotherapy Regimen (5-FU, Leucovorin, Oxaliplatin) in Metastatic Colorectal Cancer	ATC Class - L01X - Other antineoplastic agents in atc,ATC Class - L01B - Antimetabolites	Colorectal Cancer		2017-03-01	2007-04-01	5-FU, Cetuximab, Dasatinib, Leucovorin, Oxaliplatin	fluorouracil, 5-fu, 5-fluorouracil, 5 fu, 5.f.u., accusite, actikerall, adrucil, carac, efudix, efudex, fluoro-uracil roche, fluracil, fluoroplex, nsc-19893, ro 2-9757, ro-2-9757, ro-29757, tolak, dasatinib, bms-354825, bms-354825 hydrate, bms-354825-03, dasatinib hydrate, dasatinib monohydrate, sprycel, leucovorin, cetuximab, abp-494, c-225, c225, cetuximab (genetical recombination), cmab-009, c…	1	NCT00501410	Phase 1	Phase 1	Compound id 23643 - FLUOROURACIL,Compound id 501089 - DASATINIB,Compound id 570936 - LEUCOVORIN,Compound id 2689082 - CETUXIMAB,Compound id 2805075 - OXALIPLATIN
Dasatinib in Treating Patients With Stage IIIB, Stage IV, or Recurrent Non-Small Cell Lung Cancer	ATC Class - L01X - Other antineoplastic agents in atc	Non-small Cell Lung Cancer, Recurrent Non-small Cell Lung Cancer, Stage IIIB Non-small Cell Lung Cancer, Stage IV Non-small Cell Lung Cancer		2012-04-01	2007-03-01	dasatinib	dasatinib, bms-354825, bms-354825 hydrate, bms-354825-03, dasatinib hydrate, dasatinib monohydrate, sprycel	1	NCT00459342	Phase 2	Phase 2	Compound id 501089 - DASATINIB
Canadian Profiling and Targeted Agent Utilization Trial (CAPTUR)	ATC Class - L01X - Other antineoplastic agents in atc	Advanced Solid Tumors, Lymphoma, Non-Hodgkin, Multiple Myeloma		2023-09-01	2017-10-01	Axitinib, Bosutinib, Crizotinib, Dasatinib, Erlotinib, Nivolumab plus Ipilimumab, Olaparib, Palbociclib, Sunitinib, Temsirolimus, Trastuzumab plus Pertuzumab, Vemurafenib plus Cobimetinib, Vismodegib	erlotinib, osi-774, ro-508231, cp-358,774, cp-358774, cp-35877401, r-1415, rg-1415, tarceva, sunitinib, sutent, su-011248, su-11248, su011248, crizotinib, pf-2341066, pf-02341066, xalkori, cobimetinib, cotellic, gdc-0623, gdc-0973, rg 7420, rg-7420, rg-7421, rg7420, xl-518, olaparib, az-2281, az2281, azd-2281, azd2281, keylynk-010 component olaparib, ku-0059436, ku-59436, lynparza, olaparib compo…	1	NCT03297606	Phase 2	Phase 2	Compound id 141944 - ERLOTINIB,Compound id 154683 - SUNITINIB,Compound id 259783 - CRIZOTINIB,Compound id 295586 - COBIMETINIB,Compound id 422599 - OLAPARIB,Compound id 495280 - PALBOCICLIB,Compound id 501089 - DASATINIB,Compound id 505877 - VEMURAFENIB,Compound id 679371 - BOSUTINIB,Compound id 1039526 - TEMSIROLIMUS,Compound id 1811695 - VISMODEGIB,Compound id 1927385 - AXITINIB,Compound id 268…
Study of Dasatinib, Androgen Deprivation Therapy and Radiation	ATC Class - L01X - Other antineoplastic agents in atc	Prostate Cancer		2013-04-01	2013-01-01	Dasatinib	dasatinib, bms-354825, bms-354825 hydrate, bms-354825-03, dasatinib hydrate, dasatinib monohydrate, sprycel	1	NCT01826838	Phase 1	Phase 1	Compound id 501089 - DASATINIB
The Effect of Omeprazole on the Pharmacokinetics of Dasatinib in Healthy Subjects	ATC Class - L01X - Other antineoplastic agents in atc,ATC Class - A02B - Drugs for peptic ulcer and gastro-oesophageal reflux disease (gord)	Healthy		2008-05-01	2008-04-01	Dasatinib + Omeprazole	dasatinib, bms-354825, bms-354825 hydrate, bms-354825-03, dasatinib hydrate, dasatinib monohydrate, sprycel, omeprazole, antra, h-168/68, h 168/68, losec, losec mups, mezzopram, mopral, omeran, prilosec, zanprol	1	NCT00655746	Phase 1	Phase 1	Compound id 501089 - DASATINIB,Compound id 1494364 - OMEPRAZOLE
Phase I Dasatinib/Erlotinib in Recurrent Non-small Cell Lung Cancer (NSCLC)	ATC Class - L01X - Other antineoplastic agents in atc,ATC Class - G02A - Uterotonics	Non-Small-Cell Lung Carcinoma		2010-08-01	2007-03-01	Erlotinib in combination with Dasatinib	erlotinib, osi-774, ro-508231, cp-358,774, cp-358774, cp-35877401, r-1415, rg-1415, tarceva, dasatinib, bms-354825, bms-354825 hydrate, bms-354825-03, dasatinib hydrate, dasatinib monohydrate, sprycel	1	NCT00444015	Phase 1	Phase 1	Compound id 141944 - ERLOTINIB,Compound id 501089 - DASATINIB
The Randomized Study of Dasatinib and High-Dose Imatinib (600mg) in Suboptimal Responder	ATC Class - L01X - Other antineoplastic agents in atc	Chronic Myeloid Leukemia		null	null	Dasatinib and Imatinib	dasatinib, bms-354825, bms-354825 hydrate, bms-354825-03, dasatinib hydrate, dasatinib monohydrate, sprycel, imatinib, gleevec, sti-571	1	NCT00854841	null		Compound id 501089 - DASATINIB,Compound id 713353 - IMATINIB
Dasatinib as First-Line Therapy in Treating Patients With Gastrointestinal Stromal Tumors	ATC Class - L01X - Other antineoplastic agents in atc	Gastrointestinal Stromal Tumor		2018-05-01	2008-01-01	dasatinib	dasatinib, bms-354825, bms-354825 hydrate, bms-354825-03, dasatinib hydrate, dasatinib monohydrate, sprycel	1	NCT00568750	Phase 2	Phase 2	Compound id 501089 - DASATINIB
Dasatinib in Treating Patients With Recurrent Glioblastoma Multiforme or Gliosarcoma	ATC Class - L01X - Other antineoplastic agents in atc	Adult Giant Cell Glioblastoma, Adult Glioblastoma, Adult Gliosarcoma, Recurrent Adult Brain Neoplasm		2018-09-01	2007-01-01	Dasatinib, Pharmacological Study	dasatinib, bms-354825, bms-354825 hydrate, bms-354825-03, dasatinib hydrate, dasatinib monohydrate, sprycel	1	NCT00423735	Phase 2	Phase 2	Compound id 501089 - DASATINIB
Study of the Combination of Crizotinib and Dasatinib in Pediatric Research Participants With Diffuse Pontine Glioma (DIPG) and High-Grade Glioma (HGG)	ATC Class - L01X - Other antineoplastic agents in atc	Diffuse Intrinsic Pontine Glioma, High-grade Glioma		2018-09-01	2012-11-01	Crizotinib, Dasatinib	crizotinib, pf-2341066, pf-02341066, xalkori, dasatinib, bms-354825, bms-354825 hydrate, bms-354825-03, dasatinib hydrate, dasatinib monohydrate, sprycel	1	NCT01644773	Phase 1	Phase 1	Compound id 259783 - CRIZOTINIB,Compound id 501089 - DASATINIB
Blinatumomab and Combination Chemotherapy or Dasatinib, Prednisone, and Blinatumomab in Treating Older Patients With Acute Lymphoblastic Leukemia	ATC Class - L01X - Other antineoplastic agents in atc,ATC Class - L01B - Antimetabolites,ATC Class - L01C - Plant alkaloids and other natural products, antineoplastic drugs,ATC Class - L04A - Immunosuppressants,ATC Class - A07E - Intestinal antiinflammatory agents,ATC Class - H02A - Corticosteroids for systemic use, plain,ATC Class - V07A - All other non-therapeutic products	Acute Lymphoblastic Leukemia, B Acute Lymphoblastic Leukemia, B Acute Lymphoblastic Leukemia With t(9;22)(q34.1;q11.2); BCR-ABL1, Recurrent Acute Lymphoblastic Leukemia, Refractory Acute Lymphoblastic Leukemia		2022-06-01	2015-01-01	Blinatumomab, Dasatinib, Laboratory Biomarker Analysis, Mercaptopurine, Methotrexate, Methotrexate Sodium, Prednisone, Vincristine, Vincristine Sulfate	mercaptopurine, 6-mercaptopurine, 6-mercaptopurine monohydrate, mercaptopurine anhydrous, mercaptopurine hydrate, nsc-755, puri-nethol, purixan, purinethol, xaluprine, methotrexate, abitrexate, folex, mexate, mexate-aq, trexall, amethopterin, tcmdc-123832, tcmdc-125488, tcmdc-125858, adx-2191, cl 14377, cl-14377, ebetrex, emt-25299, emtexate high-pot, emtexate pf, maxtrex, methylaminopterin, meto…	1	NCT02143414	Phase 2	Phase 2	Compound id 3227 - MERCAPTOPURINE,Compound id 490791 - METHOTREXATE,Compound id 501089 - DASATINIB,Compound id 654123 - METHOTREXATE SODIUM,Compound id 986271 - VINCRISTINE,Compound id 998224 - VINCRISTINE SULFATE,Compound id 1688535 - PREDNISONE,Compound id 2728594 - BLINATUMOMAB
Phase IV, Open-label, Multicenter Study of Dasatinib in Chronic-Phase Chronic Myeloid Leukemia (CP-CML) Patients With Chronic, Low-grade Non-Hematologic Toxicity to Imatinib	ATC Class - L01X - Other antineoplastic agents in atc	Chronic Phase Chronic Myeloid Leukemia		2015-10-01	2012-12-01	Dasatinib	dasatinib, bms-354825, bms-354825 hydrate, bms-354825-03, dasatinib hydrate, dasatinib monohydrate, sprycel	1	NCT01660906	Phase 4	Phase 4	Compound id 501089 - DASATINIB
Dasatinib in Combination With Bevacizumab to Treat Advanced Solid Tumors	ATC Class - L01X - Other antineoplastic agents in atc,ATC Class - J07B - Viral vaccines	Solid Tumors		2018-09-01	2008-12-01	Bevacizumab, Dasatinib	dasatinib, bms-354825, bms-354825 hydrate, bms-354825-03, dasatinib hydrate, dasatinib monohydrate, sprycel, bevacizumab, 12-igg1, ava-1, avastin, bevacizumab beta, bi 695502, bs-503a, chs-5217, ct-16, ct-p16, ct-p16 (biosimilar of bevacizumab), fkb-238, hlx-04, hlx04, ibi305, pf-06439535, r-435, rg-435, rhumab-, rhumab-vegf, usp mab 002, monoclonal igg1	1	NCT01445509	Phase 1	Phase 1	Compound id 501089 - DASATINIB,Compound id 2689088 - BEVACIZUMAB
First-line Dasatinib Plus Conventional Chemotherapy in Adults With Newly Diagnosed Ph-Positive ALL	ATC Class - R01A - Decongestants and other nasal preparations for topical use,ATC Class - A01A - Stomatological preparations,ATC Class - S01B - Antiinflammatory agents, ophthalmologic,ATC Class - S03B - Corticosteroid ophthalmologic and otologic preparations,ATC Class - D07A - Corticosteroid dermatological preparations, plain,ATC Class - D10A - Anti-acne preparations for topical use,ATC Class - C…	Acute Lymphoblastic Leukemia		2015-04-01	2010-03-01	Cyclophosphamide, Cytarabine, Dasatinib, Daunorubicin, Dexamethasone, Mitoxantrone, Vincristine	cyclophosphamide, b-518, cyclophosphamide anhydrous, cyclophosphamide hydrate, cyclophosphamide monohydrate, cytoxan (lyophilized), cytoxan, endoxana, lyophilized cytoxan, neosar, nsc-26271, cytarabine, tarabine pfs, alexan, alexan 100, ara-cytidine, arabinosyl cytosine, cytosar, cytosar-u, depocyte, depocyt, nsc-287459, u-19,920, u-19920, mitoxantrone, novantrone, mitoxantrone hcl, nsc-279836, d…	1	NCT01004497	Phase 2	Phase 2	Compound id 51794 - CYCLOPHOSPHAMIDE,Compound id 95279 - CYTARABINE,Compound id 404639 - MITOXANTRONE,Compound id 501089 - DASATINIB,Compound id 1903831 - DEXAMETHASONE,Compound id 761015 - DAUNORUBICIN,Compound id 986271 - VINCRISTINE
PD-1 Combined With Dasatinib for as Third-line Treatment for ARID1A Mutation Advanced NSCLC	ATC Class - L01X - Other antineoplastic agents in atc	ARID1A, NSCLC Stage IV, PD-1		2021-12-01	2020-03-01	PD-1 plus Dasatinib	dasatinib, bms-354825, bms-354825 hydrate, bms-354825-03, dasatinib hydrate, dasatinib monohydrate, sprycel	1	NCT04284202	Phase 2	Phase 2	Compound id 501089 - DASATINIB
Study of Dasatinib to Treat Philadelphia Positive Acute Lymphoblastic Leukemia	ATC Class - L01X - Other antineoplastic agents in atc	Leukemia, Lymphoblastic, Acute, Philadelphia-Positive		2015-09-01	2010-04-01	dasatinib	dasatinib, bms-354825, bms-354825 hydrate, bms-354825-03, dasatinib hydrate, dasatinib monohydrate, sprycel	1	NCT01310010	Phase 2	Phase 2	Compound id 501089 - DASATINIB
Solid Tumors Using Ixabepilone and Dasatinib	ATC Class - L01X - Other antineoplastic agents in atc,ATC Class - L01D - Cytotoxic antibiotics and related substances	Solid Tumor		2011-05-01	2008-07-01	Dasatinib, ixabepilone	dasatinib, bms-354825, bms-354825 hydrate, bms-354825-03, dasatinib hydrate, dasatinib monohydrate, sprycel, ixabepilone, ixempra, bms 247550-01, bms-247550, bms-247550-01, ixempra kit	1	NCT00717704	Phase 1	Phase 1	Compound id 501089 - DASATINIB,Compound id 632492 - IXABEPILONE
Dasatinib (BMS-354825) in Subjects With Myeloid Blast Phase Chronic Myeloid Leukemia Resistant to or Intolerant of Imatinib Mesylate	ATC Class - L01X - Other antineoplastic agents in atc	Blast Crisis, Chronic Myeloid Leukemia		2008-03-01	2004-12-01	Dasatinib	dasatinib, bms-354825, bms-354825 hydrate, bms-354825-03, dasatinib hydrate, dasatinib monohydrate, sprycel	1	NCT00101816	Phase 2	Phase 2	Compound id 501089 - DASATINIB
Trial of Fulvestrant, MK-0646, and Dasatinib for Metastatic Hormone Receptor-Positive HER2-Negative Breast Cancer	ATC Class - L01X - Other antineoplastic agents in atc,ATC Class - L02B - Hormone antagonists and related agents	Breast Cancer		2013-05-01	2009-11-01	Dasatinib, Fulvestrant, MK-0646	dasatinib, bms-354825, bms-354825 hydrate, bms-354825-03, dasatinib hydrate, dasatinib monohydrate, sprycel, fulvestrant, faslodex, ici 182,780, ici-182780, zd-9238, zd9238, ici-182, dalotuzumab, mk 0646, mk-0646, mk0646	1	NCT00903006	Phase 1	Phase 1	Compound id 501089 - DASATINIB,Compound id 841536 - FULVESTRANT,Compound id 2728608 - DALOTUZUMAB
Dose Reduced Dasatinib (70 mg Daily) as First-line Treatment for Newly Diagnosed CML-CP	ATC Class - L01X - Other antineoplastic agents in atc	BCR-ABL, Chronic Myeloid Leukemia, Dasatinib		2022-12-01	2019-12-01	Dasatinib	dasatinib, bms-354825, bms-354825 hydrate, bms-354825-03, dasatinib hydrate, dasatinib monohydrate, sprycel	1	NCT04155411	Phase 4	Phase 4	Compound id 501089 - DASATINIB
Dasatinib and Cyclosporine in Treating Patients With Chronic Myelogenous Leukemia Refractory or Intolerant to Imatinib Mesylate	ATC Class - L01X - Other antineoplastic agents in atc,ATC Class - L04A - Immunosuppressants,ATC Class - S01X - Other ophthalmologicals in atc,ATC Class - S01J - Diagnostic agents, ophthamologic	Accelerated Phase Chronic Myelogenous Leukemia, Chronic Myelogenous Leukemia, BCR-ABL1 Positive, Chronic Phase Chronic Myelogenous Leukemia, Relapsing Chronic Myelogenous Leukemia		null	2011-09-01	cyclosporine, dasatinib, diagnostic laboratory biomarker analysis, pharmacological study	dasatinib, bms-354825, bms-354825 hydrate, bms-354825-03, dasatinib hydrate, dasatinib monohydrate, sprycel, cyclosporine, 27-400, antibiotic s-7481f1, capimune, capsorin, cequa, ciclosporin, cyclosporin a, deximune, gengraf, ikervis, nsc-290193, neoral, ol-27-400, optimmune, restasis multidose, restasis, sandimmun, sang-35, sangcya, sdz-oxl-400, sandimmune, vanquoral, cyclosporina	1	NCT01426334	Phase 1	Phase 1	Compound id 501089 - DASATINIB,Compound id 1009257 - CYCLOSPORINE
Testing the Addition of Ruxolitinib to the Usual Treatment (Tyrosine Kinase Inhibitors) for Chronic Myeloid Leukemia	ATC Class - L01X - Other antineoplastic agents in atc	Chronic Phase Chronic Myelogenous Leukemia, BCR-ABL1 Positive		2028-01-01	2018-10-01	Bosutinib, Dasatinib, Laboratory Biomarker Analysis, Nilotinib, Nilotinib Hydrochloride Monohydrate, Ruxolitinib, Ruxolitinib Phosphate	dasatinib, bms-354825, bms-354825 hydrate, bms-354825-03, dasatinib hydrate, dasatinib monohydrate, sprycel, bosutinib, bosulif, bosutinib monohydrate, sk-606, ski-606, nilotinib, amn 107, amn-107, amn107, tasigna, nilotinib hydrochloride monohydrate, nilotinib hydrochloride, nilotinib hydrochloride hydrate, ruxolitinib, inc-424, inc424, incb-018424, incb-18424, incb018424, jakavi, ruxolitinib ph…	1	NCT03654768	Phase 2	Phase 2	Compound id 501089 - DASATINIB,Compound id 679371 - BOSUTINIB,Compound id 794721 - NILOTINIB,Compound id 846263 - NILOTINIB HYDROCHLORIDE MONOHYDRATE,Compound id 1406851 - RUXOLITINIB,Compound id 1908137 - RUXOLITINIB PHOSPHATE
Discontinuation of Dasatinib in Patients With Chronic Myeloid Leukemia-CP Who Have Maintained Complete Molecular Remission for Two Years; Dasatinib Stop Trial	ATC Class - L01X - Other antineoplastic agents in atc	Chronic Myeloid Leukemia		2019-01-01	2012-02-01	Dasatinib	dasatinib, bms-354825, bms-354825 hydrate, bms-354825-03, dasatinib hydrate, dasatinib monohydrate, sprycel	1	NCT01627132	Phase 2	Phase 2	Compound id 501089 - DASATINIB
Evaluation of Response of Dasatinib to Treat Mastocytosis	ATC Class - L01X - Other antineoplastic agents in atc	Systemic Mastocytosis		2012-12-01	2009-11-01	Dasatinib	dasatinib, bms-354825, bms-354825 hydrate, bms-354825-03, dasatinib hydrate, dasatinib monohydrate, sprycel	1	NCT00979160	Phase 2	Phase 2	Compound id 501089 - DASATINIB
Neoadjuvant Phase 2 Study Comparing the Effects of AR Inhibition With/Without SRC or MEK Inhibition in Prostate Cancer	ATC Class - L01X - Other antineoplastic agents in atc,ATC Class - L02B - Hormone antagonists and related agents	Prostate Cancer		2023-09-01	2014-09-01	dasatinib, degarelix, enzalutamide, trametinib	enzalutamide, mdv-3100, mdv3100, xtandi, dasatinib, bms-354825, bms-354825 hydrate, bms-354825-03, dasatinib hydrate, dasatinib monohydrate, sprycel, trametinib, gsk-1120212, gsk1120212, jtp 74057, jtp-74057, mekinist, tmt-212, tmt212, degarelix, fe200486 (as acetate salt), firmagon	1	NCT01990196	Phase 2	Phase 2	Compound id 428295 - ENZALUTAMIDE,Compound id 501089 - DASATINIB,Compound id 735652 - TRAMETINIB,Compound id 1022414 - DEGARELIX
A Phase I/Expansion Study of Dasatinib	ATC Class - L01X - Other antineoplastic agents in atc,ATC Class - L01B - Antimetabolites	Pancreatic Adenocarcinoma, Refractory Solid Tumors		2012-05-01	2007-04-01	dasatinib, dasatinib, gemcitabine, gemcitabine	dasatinib, bms-354825, bms-354825 hydrate, bms-354825-03, dasatinib hydrate, dasatinib monohydrate, sprycel, gemcitabine, gemzar, ly-188011, ly188011, nsc-613327	1	NCT00598091	Phase 1	Phase 1	Compound id 501089 - DASATINIB,Compound id 1072154 - GEMCITABINE
Advanced Chronic Myelogenous Leukemia (CML) - Follow On: Study of BMS-354825 in Subjects With CML	ATC Class - L01X - Other antineoplastic agents in atc	Leukemia, Lymphoblastic, Acute, Philadelphia-Positive, Myeloid Leukemia, Chronic, Accelerated Phase		2013-06-01	2005-06-01	dasatinib, dasatinib	dasatinib, bms-354825, bms-354825 hydrate, bms-354825-03, dasatinib hydrate, dasatinib monohydrate, sprycel	1	NCT00123487	Phase 3	Phase 3	Compound id 501089 - DASATINIB
D-ALBA Frontline Sequential Dasatinib and Blinatumomab in Adult Philadelphia Positive Acute Lymphoblastic Leukemia	ATC Class - L01X - Other antineoplastic agents in atc	Acute Lymphoblastic Leukemia		2021-06-01	2017-05-01	Blinatumomab, Dasatinib	dasatinib, bms-354825, bms-354825 hydrate, bms-354825-03, dasatinib hydrate, dasatinib monohydrate, sprycel, blinatumomab, medi-538, mt-103, blincyto	1	NCT02744768	Phase 2	Phase 2	Compound id 501089 - DASATINIB,Compound id 2728594 - BLINATUMOMAB
Study of Dasatinib in Imatinib Resistant or Intolerant Subjects With Chronic or Advanced Phase CML or Philadelphia Chromosome Positive ALL	ATC Class - L01X - Other antineoplastic agents in atc	Acute Lymphoblastic Leukemia, Chronic Myeloid Leukemia		null	2006-12-01	Dasatinib	dasatinib, bms-354825, bms-354825 hydrate, bms-354825-03, dasatinib hydrate, dasatinib monohydrate, sprycel	1	NCT00349518	Phase 2	Phase 2	Compound id 501089 - DASATINIB
Efficacy Study of Dasatinib in Locally Advanced Triple-Negative Breast Cancer Patients	ATC Class - L01X - Other antineoplastic agents in atc	Breast Cancer		2011-02-01	2008-12-01	Dasatinib	dasatinib, bms-354825, bms-354825 hydrate, bms-354825-03, dasatinib hydrate, dasatinib monohydrate, sprycel	1	NCT00817531	Phase 2	Phase 2	Compound id 501089 - DASATINIB
ASTX727 and Dasatinib for the Treatment of Newly Diagnosed Philadelphia Chromosome or BCR-ABL Positive Chronic Myeloid Leukemia in Chronic Phase	ATC Class - L01X - Other antineoplastic agents in atc,ATC Class - L01B - Antimetabolites	BCR-ABL1 Positive, BCR-ABL1 Positive Chronic Myelogenous Leukemia, Chronic Phase Chronic Myelogenous Leukemia, Philadelphia Chromosome Positive		2022-10-01	2021-10-01	Dasatinib, Decitabine and Cedazuridine	decitabine, dacogen, nsc-127716, dasatinib, bms-354825, bms-354825 hydrate, bms-354825-03, dasatinib hydrate, dasatinib monohydrate, sprycel, cedazuridine, astx-727 component cedazuridine, astx727 component cedazuridine, e-7727, e7727	1	NCT05007873	Phase 2	Phase 2	Compound id 84223 - DECITABINE,Compound id 501089 - DASATINIB,Compound id 1103597 - CEDAZURIDINE
The Efficiency of CAMS (Chinese Academy of Medical Sciences)-2016 Trial for Pediatric Acute Myeloid Leukemia	ATC Class - L01X - Other antineoplastic agents in atc	Acute Myeloid Leukemia		2022-12-01	2016-08-01	Dasatinib	dasatinib, bms-354825, bms-354825 hydrate, bms-354825-03, dasatinib hydrate, dasatinib monohydrate, sprycel	1	NCT03173612	null		Compound id 501089 - DASATINIB
Treatment-free Remission Accomplished With Dasatinib in Patients With CML	ATC Class - L01X - Other antineoplastic agents in atc	Chronic Myeloid Leukemia		2021-10-01	2014-10-01	Dasatinib	dasatinib, bms-354825, bms-354825 hydrate, bms-354825-03, dasatinib hydrate, dasatinib monohydrate, sprycel	1	NCT02268370	Phase 2	Phase 2	Compound id 501089 - DASATINIB
Long-term Safety of Dasatinib in Patients With Chronic Myelogenous Leukemia or Philadelphia Chromosome Positive Acute Lymphoblastic Leukemia	ATC Class - L01X - Other antineoplastic agents in atc	Leukemia		2014-12-01	2007-10-01	Dasatinib, Imatinib	dasatinib, bms-354825, bms-354825 hydrate, bms-354825-03, dasatinib hydrate, dasatinib monohydrate, sprycel, imatinib, gleevec, sti-571	1	NCT00982488	Phase 2	Phase 2	Compound id 501089 - DASATINIB,Compound id 713353 - IMATINIB
BMS-354825 or Imatinib Mesylate in Treating Patients With Chronic Phase Chronic Myelogenous Leukemia That Did Not Respond to Previous Imatinib Mesylate	ATC Class - L01X - Other antineoplastic agents in atc	Leukemia		null	2005-03-01	dasatinib, imatinib mesylate	dasatinib, bms-354825, bms-354825 hydrate, bms-354825-03, dasatinib hydrate, dasatinib monohydrate, sprycel, imatinib, gleevec, sti-571, imatinib mesilate, imatinib mesylate, glivec, imatinib methanesulfonate, qti-571, qti571, sti 571, sti571	1	NCT00112775	Phase 2	Phase 2	Compound id 501089 - DASATINIB,Compound id 713353 - IMATINIB,Compound id 864374 - IMATINIB MESYLATE
Pediatric Philadelphia Positive Acute Lymphoblastic Leukemia	ATC Class - L01X - Other antineoplastic agents in atc	Leukemia, Pediatric		2021-05-01	2012-01-01	Dasatinib	dasatinib, bms-354825, bms-354825 hydrate, bms-354825-03, dasatinib hydrate, dasatinib monohydrate, sprycel	1	NCT01460160	Phase 2	Phase 2	Compound id 501089 - DASATINIB
A Study of Dasatinib With Concurrent Chemoradiation for Stage III Non-Small Cell Lung Cancer (NSCLC)	ATC Class - L01X - Other antineoplastic agents in atc,ATC Class - L01C - Plant alkaloids and other natural products, antineoplastic drugs	Non-Small Cell Lung Cancer		2011-12-01	2009-03-01	Group 1: Radiation, Paclitaxel,Carbo, Dasatinib days 1-47, Group 2: Radiation, Paclitaxel, Carbo, Dasatinib days 1-38	dasatinib, bms-354825, bms-354825 hydrate, bms-354825-03, dasatinib hydrate, dasatinib monohydrate, sprycel, paclitaxel, abi-007, abi-007 component paclitaxel, abraxane, bms 181339-01, bms-181339-01, dhp 107, dhp-107, mbt 0206, mbt-0206, nk 105, nk-105, nsc-125973, pacitaxel, paxene, qw-8184, taxol, taxol 100	1	NCT00787852	Phase 1	Phase 1	Compound id 501089 - DASATINIB,Compound id 991478 - PACLITAXEL
Dasatinib and Combination Chemotherapy in Treating Young Patients With Newly Diagnosed Acute Lymphoblastic Leukemia	ATC Class - R01A - Decongestants and other nasal preparations for topical use,ATC Class - A01A - Stomatological preparations,ATC Class - S01B - Antiinflammatory agents, ophthalmologic,ATC Class - S03B - Corticosteroid ophthalmologic and otologic preparations,ATC Class - D07A - Corticosteroid dermatological preparations, plain,ATC Class - D10A - Anti-acne preparations for topical use,ATC Class - C…	Acute Lymphoblastic Leukemia, Adult B Acute Lymphoblastic Leukemia With t(9;22)(q34.1;q11.2); BCR-ABL1, Childhood B Acute Lymphoblastic Leukemia With t(9;22)(q34.1;q11.2); BCR-ABL1		2020-03-01	2008-07-01	Asparaginase, Cyclophosphamide, Cytarabine, Dasatinib, Daunorubicin Hydrochloride, Dexamethasone, Etoposide, Filgrastim, Hydrocortisone Sodium Succinate, Ifosfamide, Laboratory Biomarker Analysis, Leucovorin Calcium, Mercaptopurine, Methotrexate, Methylprednisolone, Pegaspargase, Prednisone, Radiation Therapy, Vincristine Sulfate	mercaptopurine, 6-mercaptopurine, 6-mercaptopurine monohydrate, mercaptopurine anhydrous, mercaptopurine hydrate, nsc-755, puri-nethol, purixan, purinethol, xaluprine, cyclophosphamide, b-518, cyclophosphamide anhydrous, cyclophosphamide hydrate, cyclophosphamide monohydrate, cytoxan (lyophilized), cytoxan, endoxana, lyophilized cytoxan, neosar, nsc-26271, ifosfamide, ifsofamide, ifex, mitoxana, …	1	NCT00720109	Phase 2	Phase 2	Compound id 3227 - MERCAPTOPURINE,Compound id 51794 - CYCLOPHOSPHAMIDE,Compound id 30136 - IFOSFAMIDE,Compound id 95279 - CYTARABINE,Compound id 490791 - METHOTREXATE,Compound id 501089 - DASATINIB,Compound id 1903831 - DEXAMETHASONE,Compound id 570936 - LEUCOVORIN,Compound id 577237 - HYDROCORTISONE SODIUM SUCCINATE,Compound id 1791601 - METHYLPREDNISOLONE,Compound id 632578 - LEUCOVORIN CALCIUM…
Clinical Research for Azacitidine Combined With Low-dose Dasatinib in Maintenance Therapy of Acute Myeloid Leukemia	ATC Class - L01X - Other antineoplastic agents in atc,ATC Class - L01B - Antimetabolites,ATC Class - J07B - Viral vaccines	Acute Myeloid Leukemia		2023-12-01	2021-10-01	Azacitidine, Dasatinib	dasatinib, bms-354825, bms-354825 hydrate, bms-354825-03, dasatinib hydrate, dasatinib monohydrate, sprycel, azacitidine, vidaza, ladakamycin, nsc-102816, onureg, u-18,496, u-18496	1	NCT05042531	null		Compound id 501089 - DASATINIB,Compound id 1041322 - AZACITIDINE
Evaluating the Safety of Zileuton (ZyfloÂ®) in Combination With Dasatinib (SprycelÂ®) in Chronic Myelogenous Leukemia	ATC Class - L01X - Other antineoplastic agents in atc	Chronic Myelogenous Leukemia		2016-06-01	2014-01-01	Daily dosing of Zileuton/Dasatinib, Daily dosing with Zileuton/Dasatinib for CML, Dosing with Zileuton/Dasatinib in CML, Zileuton (Zyflo) Dasatinib (Sprycel)	zileuton, abbott-64077, a-64077, zyflo cr, zyflo, dasatinib, bms-354825, bms-354825 hydrate, bms-354825-03, dasatinib hydrate, dasatinib monohydrate, sprycel	1	NCT02047149	Phase 1	Phase 1	Compound id 70347 - ZILEUTON,Compound id 501089 - DASATINIB
Treatment With Combination Chemotherapy for Relapsed or Refractory Acute Lymphoblastic Leukemia	ATC Class - R01A - Decongestants and other nasal preparations for topical use,ATC Class - A01A - Stomatological preparations,ATC Class - S01B - Antiinflammatory agents, ophthalmologic,ATC Class - S03B - Corticosteroid ophthalmologic and otologic preparations,ATC Class - D07A - Corticosteroid dermatological preparations, plain,ATC Class - D10A - Anti-acne preparations for topical use,ATC Class - C…	Acute Lymphoblastic Leukemia With Failed Remission, Acute Lymphoblastic Leukemia, in Relapse		2020-07-01	2018-04-01	Bortezomib, Dasatinib, Dexamethasone, Doxorubicin, Intrathecal Triple Therapy, Palbociclib Oral Capsule, Ruxolitinib	pd0332991, palbociclib, ibrance, pd-0332991, pf-332991, dasatinib, bms-354825, bms-354825 hydrate, bms-354825-03, dasatinib hydrate, dasatinib monohydrate, sprycel, dexamethasone, decadron-la, dexacen-4, dexacort, dexair, mymethasone, neodecadron, dalalone, kortico injection, aeroseb-dex, decaderm, decadron-75, decaspray, dexacortisyl, dexafree, dexamethasone intensol, dexamethasone metasulfobenz…	1	NCT03515200	Phase 1	Phase 1	Compound id 495280 - PALBOCICLIB,Compound id 501089 - DASATINIB,Compound id 1903831 - DEXAMETHASONE,Compound id 791569 - DOXORUBICIN,Compound id 1406851 - RUXOLITINIB,Compound id 1901573 - BORTEZOMIB
Dasatinib in Treating Patients With Recurrent or Metastatic Head and Neck Cancer	ATC Class - L01X - Other antineoplastic agents in atc	Metastatic Squamous Neck Cancer With Occult Primary Squamous Cell Carcinoma, Recurrent Metastatic Squamous Neck Cancer With Occult Primary, Recurrent Salivary Gland Cancer, Recurrent Squamous Cell Carcinoma of the Hypopharynx, Recurrent Squamous Cell Carcinoma of the Larynx, Recurrent Squamous Cell Carcinoma of the Lip and Oral Cavity, Recurrent Squamous Cell Carcinoma of the Nasopharynx, Recurre…		2010-02-01	2007-07-01	dasatinib, laboratory biomarker analysis, pharmacological study	dasatinib, bms-354825, bms-354825 hydrate, bms-354825-03, dasatinib hydrate, dasatinib monohydrate, sprycel	1	NCT00507767	Phase 2	Phase 2	Compound id 501089 - DASATINIB
Low-dose Chemotherapy Combine With Tyrosine Kinase Inhibitor to Treat ph+ Acute Lymphoblastic Leukemia Patients	ATC Class - R01A - Decongestants and other nasal preparations for topical use,ATC Class - A01A - Stomatological preparations,ATC Class - S01B - Antiinflammatory agents, ophthalmologic,ATC Class - S03B - Corticosteroid ophthalmologic and otologic preparations,ATC Class - D07A - Corticosteroid dermatological preparations, plain,ATC Class - D10A - Anti-acne preparations for topical use,ATC Class - C…	ph+ Acute Lymphoblastic Leukemia		2017-05-01	2016-03-01	Dasatinib, dexamethasone, methotrexate, prednisone	methotrexate, abitrexate, folex, mexate, mexate-aq, trexall, amethopterin, tcmdc-123832, tcmdc-125488, tcmdc-125858, adx-2191, cl 14377, cl-14377, ebetrex, emt-25299, emtexate high-pot, emtexate pf, maxtrex, methylaminopterin, metoject, nsc-740, otrexup, otrexup pfs, r-9985, r-methotrexate, rasuvo, reditrex, rheumatrex, zlatal, dasatinib, bms-354825, bms-354825 hydrate, bms-354825-03, dasatinib h…	1	NCT02690922	Phase 4	Phase 4	Compound id 490791 - METHOTREXATE,Compound id 501089 - DASATINIB,Compound id 1903831 - DEXAMETHASONE,Compound id 1688535 - PREDNISONE
Pembrolizumab and Dasatinib, Imatinib Mesylate, or Nilotinib in Treating Patients With Chronic Myeloid Leukemia and Persistently Detectable Minimal Residual Disease	ATC Class - L01X - Other antineoplastic agents in atc	Chronic Phase Chronic Myelogenous Leukemia, BCR-ABL1 Positive, Minimal Residual Disease		2031-08-01	2018-10-01	Dasatinib, Imatinib Mesylate, Laboratory Biomarker Analysis, Nilotinib, Pembrolizumab	dasatinib, bms-354825, bms-354825 hydrate, bms-354825-03, dasatinib hydrate, dasatinib monohydrate, sprycel, imatinib, gleevec, sti-571, nilotinib, amn 107, amn-107, amn107, tasigna, imatinib mesilate, imatinib mesylate, glivec, imatinib methanesulfonate, qti-571, qti571, sti 571, sti571, pembrolizumab, keylynk-010 component pembrolizumab, keytruda, lambrolizumab, mk-3475, pembrolizumab component…	1	NCT03516279	Phase 2	Phase 2	Compound id 501089 - DASATINIB,Compound id 713353 - IMATINIB,Compound id 794721 - NILOTINIB,Compound id 864374 - IMATINIB MESYLATE,Compound id 2764841 - PEMBROLIZUMAB
Senescence in Chronic Kidney Disease	ATC Class - L01X - Other antineoplastic agents in atc,ATC Class - G03C - Estrogens, sex hormones and modulators of the genital system	Chronic Kidney Disease		2022-06-01	2016-07-01	Group 2: Dasatinib, Group 2: Quercetin	dasatinib, bms-354825, bms-354825 hydrate, bms-354825-03, dasatinib hydrate, dasatinib monohydrate, sprycel, quercetin, xanthaurine, meletin, sophoretin, c.i. natural red 1, ldn 0052529, ldn-0052529, nsc 57655, nsc 9219, nsc-57655, nsc-9219	1	NCT02848131	Phase 2	Phase 2	Compound id 501089 - DASATINIB,Compound id 1305802 - QUERCETIN
Dasatinib in Treating Patients With Solid Tumors or Lymphomas That Are Metastatic or Cannot Be Removed By Surgery	ATC Class - L01X - Other antineoplastic agents in atc	Adult Acute Lymphoblastic Leukemia in Remission, Adult B Acute Lymphoblastic Leukemia, Adult Hepatocellular Carcinoma, Adult Nasal Type Extranodal NK/T-Cell Lymphoma, Adult Solid Neoplasm, Adult T Acute Lymphoblastic Leukemia, Advanced Adult Hepatocellular Carcinoma, Anaplastic Large Cell Lymphoma, Angioimmunoblastic T-Cell Lymphoma, Chronic Lymphocytic Leukemia, Cutaneous B-Cell Non-Hodgkin Lymp…		2014-08-01	2008-10-01	Dasatinib, Pharmacological Study	dasatinib, bms-354825, bms-354825 hydrate, bms-354825-03, dasatinib hydrate, dasatinib monohydrate, sprycel	1	NCT00608361	Phase 1	Phase 1	Compound id 501089 - DASATINIB
Dasatinib Plus Radiation Therapy/Temozolomide in Newly-Diagnosed Glioblastoma	ATC Class - L01X - Other antineoplastic agents in atc,ATC Class - L01A - Alkylating agents	Brain Diseases, CNS Disease, Glioblastoma		2013-08-01	2009-05-01	Dasatinib, RT (Radiotherapy), TMZ (Temozolomide)	temozolomide, m&b-39831, ccrg-81045, m&b 39831, m-39831, nsc-362856, sch 52365, sch-52365, temodal, temomedac, temodar, dasatinib, bms-354825, bms-354825 hydrate, bms-354825-03, dasatinib hydrate, dasatinib monohydrate, sprycel	1	NCT00895960	Phase 1	Phase 1	Compound id 27258 - TEMOZOLOMIDE,Compound id 501089 - DASATINIB
A Clinical Trial Evaluating the Efficacy and Safety of Dasatinib in Refractory Metastatic GIST	ATC Class - L01X - Other antineoplastic agents in atc	Gastrointestinal Stromal Tumor		2018-05-01	2016-05-01	dasatinib	dasatinib, bms-354825, bms-354825 hydrate, bms-354825-03, dasatinib hydrate, dasatinib monohydrate, sprycel	1	NCT02776878	null		Compound id 501089 - DASATINIB
Study of Dasatinib (BMS-354825) in Patients With Accelerated Phase Chronic Myeloid Leukemia	ATC Class - L01X - Other antineoplastic agents in atc	Chronic Myelogenous Leukemia		2008-03-01	2004-12-01	Dasatinib	dasatinib, bms-354825, bms-354825 hydrate, bms-354825-03, dasatinib hydrate, dasatinib monohydrate, sprycel	1	NCT00101647	Phase 2	Phase 2	Compound id 501089 - DASATINIB
Effects of Gastric pH on the Pharmacokinetics of Dasatinib	ATC Class - L01X - Other antineoplastic agents in atc,ATC Class - A09A - Digestives, incl. enzymes,ATC Class - A02B - Drugs for peptic ulcer and gastro-oesophageal reflux disease (gord),ATC Class - A16A - Other alimentary tract and metabolism products in atc	Healthy		2014-02-01	2011-08-01	Dasatinib, Dasatinib plus Rabeprazole, Dasatinib plus Rabeprazole AND Betaine Hydrochloride	betaine, betaine, anhydrous, cystadane, fema no. 4223, nsc-166511, betaine hydrochloride, betaine hcl, acidol pepsin, lycine hydrochloride, nsc-32191, nsc-3976, dasatinib, bms-354825, bms-354825 hydrate, bms-354825-03, dasatinib hydrate, dasatinib monohydrate, sprycel, rabeprazole, aciphex, ly-307640, e-3810 (ppi), e3810, ly307640	1	NCT01398046	Phase 1	Phase 1	Compound id 12045 - BETAINE,Compound id 34177 - BETAINE HYDROCHLORIDE,Compound id 501089 - DASATINIB,Compound id 1589779 - RABEPRAZOLE
Optimization of TKIs Treatment and Quality of Life in Ph+ CML Patients â¥60 Years in Deep Molecular Response	ATC Class - L01X - Other antineoplastic agents in atc	Leukemia, Chronic Myeloid		2021-12-01	2015-06-01	dasatinib, imatinib, nilotinib	dasatinib, bms-354825, bms-354825 hydrate, bms-354825-03, dasatinib hydrate, dasatinib monohydrate, sprycel, imatinib, gleevec, sti-571, nilotinib, amn 107, amn-107, amn107, tasigna	1	NCT02326311	Phase 3	Phase 3	Compound id 501089 - DASATINIB,Compound id 713353 - IMATINIB,Compound id 794721 - NILOTINIB
Dasatinib in Relapsed Chronic Lymphocytic Leukemia	ATC Class - L01X - Other antineoplastic agents in atc	Chronic Lymphocytic Leukemia		2013-03-01	2006-12-01	Dasatinib	dasatinib, bms-354825, bms-354825 hydrate, bms-354825-03, dasatinib hydrate, dasatinib monohydrate, sprycel	1	NCT00438854	Phase 2	Phase 2	Compound id 501089 - DASATINIB
Dasatinib, Cytarabine, and Idarubicin in Treating Patients With High-Risk Acute Myeloid Leukemia	ATC Class - L01X - Other antineoplastic agents in atc,ATC Class - L01B - Antimetabolites,ATC Class - L01D - Cytotoxic antibiotics and related substances	Adult Acute Myeloid Leukemia With 11q23 (MLL) Abnormalities, Adult Acute Myeloid Leukemia With Del(5q), Adult Acute Myeloid Leukemia With Inv(16)(p13;q22), Adult Acute Myeloid Leukemia With t(15;17)(q22;q12), Adult Acute Myeloid Leukemia With t(16;16)(p13;q22), Adult Acute Myeloid Leukemia With t(8;21)(q22;q22), Recurrent Adult Acute Myeloid Leukemia, Secondary Acute Myeloid Leukemia, Untreated A…		2018-04-01	2013-09-01	cytarabine, dasatinib, idarubicin, laboratory biomarker analysis	cytarabine, tarabine pfs, alexan, alexan 100, ara-cytidine, arabinosyl cytosine, cytosar, cytosar-u, depocyte, depocyt, nsc-287459, u-19,920, u-19920, dasatinib, bms-354825, bms-354825 hydrate, bms-354825-03, dasatinib hydrate, dasatinib monohydrate, sprycel, idarubicin, idamycin	1	NCT01876953	Phase 1	Phase 1	Compound id 95279 - CYTARABINE,Compound id 501089 - DASATINIB,Compound id 680120 - IDARUBICIN
Gemcitabine Hydrochloride, Dasatinib, and Erlotinib Hydrochloride in Treating Patients With Pancreatic Cancer That Is Metastatic or Cannot Be Removed by Surgery	ATC Class - L01X - Other antineoplastic agents in atc,ATC Class - L01B - Antimetabolites	Metastatic Pancreatic Adenocarcinoma, Recurrent Pancreatic Carcinoma, Stage III Pancreatic Cancer AJCC v6 and v7, Stage IV Pancreatic Cancer AJCC v6 and v7		null	2012-07-01	Dasatinib, Erlotinib Hydrochloride, Gemcitabine Hydrochloride	erlotinib, osi-774, ro-508231, cp-358,774, cp-358774, cp-35877401, r-1415, rg-1415, tarceva, erlotinib hydrochloride, cp-358, cp-358,774-01, cp-358774-01, dasatinib, bms-354825, bms-354825 hydrate, bms-354825-03, dasatinib hydrate, dasatinib monohydrate, sprycel, gemcitabine, gemzar, ly-188011, ly188011, nsc-613327, gemcitabine hydrochloride, infugem, ly-188011 hydrochloride, ly188011 hydrochlori…	1	NCT01660971	Phase 1	Phase 1	Compound id 141944 - ERLOTINIB,Compound id 260412 - ERLOTINIB HYDROCHLORIDE,Compound id 501089 - DASATINIB,Compound id 1072154 - GEMCITABINE,Compound id 1134085 - GEMCITABINE HYDROCHLORIDE
Dasatinib and Low Intensity Chemotherapy for Ph+ Acute Lymphoblastic Leukemia	ATC Class - L01X - Other antineoplastic agents in atc	Leukemia, Lymphoblastic, Acute		2016-01-01	2007-08-01	Dasatinib	dasatinib, bms-354825, bms-354825 hydrate, bms-354825-03, dasatinib hydrate, dasatinib monohydrate, sprycel	1	NCT02888990	Phase 2	Phase 2	Compound id 501089 - DASATINIB
Dasatinib in Treating Patients With Recurrent or Metastatic Malignant Salivary Gland Tumors	ATC Class - L01X - Other antineoplastic agents in atc	Malignant Salivary Gland Neoplasm, Recurrent Salivary Gland Carcinoma, Salivary Gland Adenoid Cystic Carcinoma, Stage IV Major Salivary Gland Cancer AJCC v7		null	2009-03-01	Dasatinib, Laboratory Biomarker Analysis	dasatinib, bms-354825, bms-354825 hydrate, bms-354825-03, dasatinib hydrate, dasatinib monohydrate, sprycel	1	NCT00859937	Phase 2	Phase 2	Compound id 501089 - DASATINIB
Phase II Trial of Dasatinib in Patients With Isocitrate Dehydrogenase (IDH)-Mutant Advanced Intrahepatic Cholangiocarcinoma	ATC Class - L01X - Other antineoplastic agents in atc	Cholangiocarcinoma		2018-02-01	2015-04-01	Dasatinib	dasatinib, bms-354825, bms-354825 hydrate, bms-354825-03, dasatinib hydrate, dasatinib monohydrate, sprycel	1	NCT02428855	Phase 2	Phase 2	Compound id 501089 - DASATINIB
Efficacy and Safety Study of Dasatinib in Patients With Chronic Myeloid Leukemia	ATC Class - L01X - Other antineoplastic agents in atc	Chronic Myeloid Leukemia		2011-11-01	2010-02-01	Dasatinib (Sprycel)	dasatinib, bms-354825, bms-354825 hydrate, bms-354825-03, dasatinib hydrate, dasatinib monohydrate, sprycel	1	NCT00895297	Phase 2	Phase 2	Compound id 501089 - DASATINIB
Dasatinib and Bevacizumab in Treating Patients With Recurrent or Progressive High-Grade Glioma or Glioblastoma Multiforme	ATC Class - L01X - Other antineoplastic agents in atc,ATC Class - J07B - Viral vaccines	Glioblastoma Multiforme		2019-07-01	2009-10-01	bevacizumab, dasatinib, placebo	dasatinib, bms-354825, bms-354825 hydrate, bms-354825-03, dasatinib hydrate, dasatinib monohydrate, sprycel, bevacizumab, 12-igg1, ava-1, avastin, bevacizumab beta, bi 695502, bs-503a, chs-5217, ct-16, ct-p16, ct-p16 (biosimilar of bevacizumab), fkb-238, hlx-04, hlx04, ibi305, pf-06439535, r-435, rg-435, rhumab-, rhumab-vegf, usp mab 002, monoclonal igg1	1	NCT00892177	Phase 2	Phase 2	Compound id 501089 - DASATINIB,Compound id 2689088 - BEVACIZUMAB
Trial of Dasatinib in Patients With Advanced Cancers Harboring DDR2 Mutation or Inactivating B-RAF Mutation	ATC Class - L01X - Other antineoplastic agents in atc	Carcinoma, Non-small Cell Lung		2014-07-01	2012-05-01	Dasatinib	dasatinib, bms-354825, bms-354825 hydrate, bms-354825-03, dasatinib hydrate, dasatinib monohydrate, sprycel	1	NCT01514864	Phase 2	Phase 2	Compound id 501089 - DASATINIB
COAST Therapy in Advanced Solid Tumors and Prostate Cancer	ATC Class - L01X - Other antineoplastic agents in atc,ATC Class - S01X - Other ophthalmologicals in atc,ATC Class - L04A - Immunosuppressants,ATC Class - A10B - Blood glucose lowering drugs, excl. insulins,ATC Class - P01B - Antimalarials,ATC Class - J05A - Direct acting antivirals	Prostate Cancer Recurrent, Solid Tumor, Adult		2025-10-01	2022-01-01	Hydroxychloroquine, Metformin, Sirolimus, Hydroxychloroquine, Metformin, Sirolimus, Dasatanib, Hydroxychloroquine, Metformin, Sirolimus, Nelfinavir, Hydroxychloroquine, Metformin, Sirolimus, Nelfinavir, Hydroxychloroquine, Metformin, Sirolimus, Nelfinavir, Dasatinib, Hydroxychloroquine, Metformin, Sirolimus, Nelfinavir, Dasatinib	metformin, la-6023, dasatinib, bms-354825, bms-354825 hydrate, bms-354825-03, dasatinib hydrate, dasatinib monohydrate, sprycel, nelfinavir, viracept, sirolimus, ay-22989, l04aa10, nsc-226080, rapamycin, rapamune, sm-88 component sirolimus, wy-090217, hydroxychloroquine	1	NCT05036226	Phase 1	Phase 1	Compound id 23928 - METFORMIN,Compound id 501089 - DASATINIB,Compound id 811881 - NELFINAVIR,Compound id 997103 - SIROLIMUS,Compound id 1402207 - HYDROXYCHLOROQUINE
Senolytic Therapy to Modulate the Progression of Alzheimer's Disease (SToMP-AD) Study	ATC Class - L01X - Other antineoplastic agents in atc,ATC Class - G03C - Estrogens, sex hormones and modulators of the genital system	Alzheimer Disease, Early Onset, Mild Cognitive Impairment		2031-12-01	2021-12-01	Dasatinib + Quercetin, Placebo Capsules	dasatinib, bms-354825, bms-354825 hydrate, bms-354825-03, dasatinib hydrate, dasatinib monohydrate, sprycel, quercetin, xanthaurine, meletin, sophoretin, c.i. natural red 1, ldn 0052529, ldn-0052529, nsc 57655, nsc 9219, nsc-57655, nsc-9219	1	NCT04685590	Phase 2	Phase 2	Compound id 501089 - DASATINIB,Compound id 1305802 - QUERCETIN
Dasatinib and Erlotinib in Non-Small Cell Lung Cancer (NSCLC)	ATC Class - L01X - Other antineoplastic agents in atc	Lung Cancer, Non-Small Cell Lung Cancer		2014-06-01	2009-02-01	Dasatinib, Erlotinib	erlotinib, osi-774, ro-508231, cp-358,774, cp-358774, cp-35877401, r-1415, rg-1415, tarceva, dasatinib, bms-354825, bms-354825 hydrate, bms-354825-03, dasatinib hydrate, dasatinib monohydrate, sprycel	1	NCT00826449	Phase 1	Phase 1	Compound id 141944 - ERLOTINIB,Compound id 501089 - DASATINIB
Comparison of Imatinib Versus Dasatinib in Patients With Newly-diagnosed Chronic Phase Chronic Myeloid Leukaemia	ATC Class - L01X - Other antineoplastic agents in atc	Myeloid Leukemia, Chronic, Chronic Phase		2018-03-01	2008-08-01	Dasatinib, Imatinib	dasatinib, bms-354825, bms-354825 hydrate, bms-354825-03, dasatinib hydrate, dasatinib monohydrate, sprycel, imatinib, gleevec, sti-571	1	NCT01460693	Phase 3	Phase 3	Compound id 501089 - DASATINIB,Compound id 713353 - IMATINIB
A Dose Escalation and Expansion Study Evaluating the Safety, Tolerability, Pharmacokinetics, and Pharmacodynamics of RO7283420.	ATC Class - N02B - Other analgesics and antipyretics in atc,ATC Class - R01A - Decongestants and other nasal preparations for topical use,ATC Class - A01A - Stomatological preparations,ATC Class - S01B - Antiinflammatory agents, ophthalmologic,ATC Class - S03B - Corticosteroid ophthalmologic and otologic preparations,ATC Class - D07A - Corticosteroid dermatological preparations, plain,ATC Class -…	Acute Myeloid Leukemia		2024-10-01	2020-11-01	Dasatinib, Dexamethasone, Diphenhydramine, Paracetamol/acetaminophen, RO7283420, RO7283420, Tocilizumab	acetaminophen, datril, paracetamol, phenaphen, abdine, alvedon, angiers, apap, acephen, calpol, calpol six plus, calpol six plus fastmelts, child lemsip, cupanol, dafalgan, disprol, disprol infant, disprol jnr, disprol paed, fennings, galpamol, hedex, infadrops, infants' feverall, injectapap, junior parapaed, mandanol, medinol, medinol for children, medinol over 6, medinol under 6, medised plain,…	1	NCT04580121	Phase 1	Phase 1	Compound id 78828 - ACETAMINOPHEN,Compound id 1121855 - DIPHENHYDRAMINE,Compound id 501089 - DASATINIB,Compound id 1903831 - DEXAMETHASONE,Compound id 2696768 - TOCILIZUMAB
Pediatric-Inspired Chemotherapy Plus Tyrosine Kinase Inhibitor in Adult Philadelphia Chromosome-Positive Acute Lymphoblastic Leukemia	ATC Class - L01X - Other antineoplastic agents in atc,ATC Class - L04A - Immunosuppressants,ATC Class - L01B - Antimetabolites	Acute Lymphoblastic Leukemia		2027-11-01	2021-11-01	Berlin-Frankfurt-Mnster Chemotherapy, Dasatinib, Methotrexate and Cytarabine, Ponatinib	cytarabine, tarabine pfs, alexan, alexan 100, ara-cytidine, arabinosyl cytosine, cytosar, cytosar-u, depocyte, depocyt, nsc-287459, u-19,920, u-19920, methotrexate, abitrexate, folex, mexate, mexate-aq, trexall, amethopterin, tcmdc-123832, tcmdc-125488, tcmdc-125858, adx-2191, cl 14377, cl-14377, ebetrex, emt-25299, emtexate high-pot, emtexate pf, maxtrex, methylaminopterin, metoject, nsc-740, ot…	1	NCT04845035	Phase 2	Phase 2	Compound id 95279 - CYTARABINE,Compound id 490791 - METHOTREXATE,Compound id 501089 - DASATINIB,Compound id 801073 - PONATINIB
XAD - Xelox (Capecitabine + Oxaliplatin) + Bevacizumab + Dasatinib	ATC Class - L01X - Other antineoplastic agents in atc,ATC Class - L01B - Antimetabolites,ATC Class - J07B - Viral vaccines	Metastatic Colorectal Cancer, Solid Tumor		2014-08-01	2009-05-01	Capecitabine, Oxaliplatin, bevacizumab, dasatinib	dasatinib, bms-354825, bms-354825 hydrate, bms-354825-03, dasatinib hydrate, dasatinib monohydrate, sprycel, capecitabine, xeloda, ro 09-1978/000, ro-09-1978000, ro-091978000, bevacizumab, 12-igg1, ava-1, avastin, bevacizumab beta, bi 695502, bs-503a, chs-5217, ct-16, ct-p16, ct-p16 (biosimilar of bevacizumab), fkb-238, hlx-04, hlx04, ibi305, pf-06439535, r-435, rg-435, rhumab-, rhumab-vegf, usp …	1	NCT00920868	Phase 1	Phase 1	Compound id 501089 - DASATINIB,Compound id 1614588 - CAPECITABINE,Compound id 2689088 - BEVACIZUMAB,Compound id 2805075 - OXALIPLATIN
An Open-Label Intervention Trial to Reduce Senescence and Improve Frailty in Adult Survivors of Childhood Cancer	ATC Class - L01X - Other antineoplastic agents in atc,ATC Class - G03C - Estrogens, sex hormones and modulators of the genital system	Childhood Cancer, Frailty		2024-07-01	2021-10-01	Dasatinib plus Quercetin, Fisetin	dasatinib, bms-354825, bms-354825 hydrate, bms-354825-03, dasatinib hydrate, dasatinib monohydrate, sprycel, fisetin, nsc-407010, nsc-656275, quercetin, xanthaurine, meletin, sophoretin, c.i. natural red 1, ldn 0052529, ldn-0052529, nsc 57655, nsc 9219, nsc-57655, nsc-9219	1	NCT04733534	Phase 2	Phase 2	Compound id 501089 - DASATINIB,Compound id 1234742 - FISETIN,Compound id 1305802 - QUERCETIN
Dasatinib Followed by Stem Cell Transplant in Treating Older Patients With Newly Diagnosed Acute Lymphoblastic Leukemia	ATC Class - R01A - Decongestants and other nasal preparations for topical use,ATC Class - A01A - Stomatological preparations,ATC Class - S01B - Antiinflammatory agents, ophthalmologic,ATC Class - S03B - Corticosteroid ophthalmologic and otologic preparations,ATC Class - D07A - Corticosteroid dermatological preparations, plain,ATC Class - D10A - Anti-acne preparations for topical use,ATC Class - C…	Acute Lymphoblastic Leukemia, Adult B Acute Lymphoblastic Leukemia With t(9;22)(q34.1;q11.2); BCR-ABL1		2022-08-01	2010-12-01	Alemtuzumab, Allogeneic Hematopoietic Stem Cell Transplantation, Autologous Hematopoietic Stem Cell Transplantation, Cyclophosphamide, Cytarabine, Dasatinib, Daunorubicin Hydrochloride, Dexamethasone, Etoposide Phosphate, Filgrastim, Fludarabine Phosphate, In Vitro-Treated Peripheral Blood Stem Cell Transplantation, Laboratory Biomarker Analysis, Leucovorin Calcium, Melphalan, Mercaptopurine, Met…	mercaptopurine, 6-mercaptopurine, 6-mercaptopurine monohydrate, mercaptopurine anhydrous, mercaptopurine hydrate, nsc-755, puri-nethol, purixan, purinethol, xaluprine, cyclophosphamide, b-518, cyclophosphamide anhydrous, cyclophosphamide hydrate, cyclophosphamide monohydrate, cytoxan (lyophilized), cytoxan, endoxana, lyophilized cytoxan, neosar, nsc-26271, cytarabine, tarabine pfs, alexan, alexan…	1	NCT01256398	Phase 2	Phase 2	Compound id 3227 - MERCAPTOPURINE,Compound id 51794 - CYCLOPHOSPHAMIDE,Compound id 95279 - CYTARABINE,Compound id 490791 - METHOTREXATE,Compound id 501089 - DASATINIB,Compound id 1903831 - DEXAMETHASONE,Compound id 570936 - LEUCOVORIN,Compound id 632578 - LEUCOVORIN CALCIUM,Compound id 761015 - DAUNORUBICIN,Compound id 798304 - DAUNORUBICIN HYDROCHLORIDE,Compound id 866156 - ETOPOSIDE,Compound id…
PH I SRC Kinase, Dasatinib Combo Paclitaxel & Carboplatin in Pts w Ovarian, Peritoneal, & Tubal Cancer	ATC Class - L01X - Other antineoplastic agents in atc,ATC Class - L01C - Plant alkaloids and other natural products, antineoplastic drugs	Fallopian Tube Cancer, Ovarian Cancer, Peritoneal Cancer		2012-11-01	2007-08-01	Dasatinib, Paclitaxel, and Carboplatin	dasatinib, bms-354825, bms-354825 hydrate, bms-354825-03, dasatinib hydrate, dasatinib monohydrate, sprycel, paclitaxel, abi-007, abi-007 component paclitaxel, abraxane, bms 181339-01, bms-181339-01, dhp 107, dhp-107, mbt 0206, mbt-0206, nk 105, nk-105, nsc-125973, pacitaxel, paxene, qw-8184, taxol, taxol 100, carboplatin, paraplatin, carboplatine, jm-8, nsc-201345, nsc-241240	1	NCT00672295	Phase 1	Phase 1	Compound id 501089 - DASATINIB,Compound id 991478 - PACLITAXEL,Compound id 2702494 - CARBOPLATIN
Personalized Kinase Inhibitor Therapy Combined With Chemotherapy in Treating Patients With Newly Diagnosed Acute Myeloid Leukemia and Acute Lymphoblastic Leukemia	ATC Class - L01X - Other antineoplastic agents in atc,ATC Class - R01A - Decongestants and other nasal preparations for topical use,ATC Class - A01A - Stomatological preparations,ATC Class - S01B - Antiinflammatory agents, ophthalmologic,ATC Class - S03B - Corticosteroid ophthalmologic and otologic preparations,ATC Class - D07A - Corticosteroid dermatological preparations, plain,ATC Class - D10A …	Acute Lymphoblastic Leukemia, Acute Myeloid Leukemia		2018-09-01	2016-01-01	Cyclophosphamide, Cytarabine, Dasatinib, Dexamethasone, Doxorubicin Hydrochloride, Idarubicin, Idelalisib, In Vitro Kinase Inhibitor Assay, Leucovorin Calcium, Methotrexate, Methylprednisolone Sodium Succinate, Ponatinib Hydrochloride, Rituximab, Ruxolitinib Phosphate, Sorafenib Tosylate, Sunitinib Malate, Vincristine Sulfate	cyclophosphamide, b-518, cyclophosphamide anhydrous, cyclophosphamide hydrate, cyclophosphamide monohydrate, cytoxan (lyophilized), cytoxan, endoxana, lyophilized cytoxan, neosar, nsc-26271, cytarabine, tarabine pfs, alexan, alexan 100, ara-cytidine, arabinosyl cytosine, cytosar, cytosar-u, depocyte, depocyt, nsc-287459, u-19,920, u-19920, sunitinib, sutent, su-011248, su-11248, su011248, idelali…	1	NCT02779283	Phase 1	Phase 1	Compound id 51794 - CYCLOPHOSPHAMIDE,Compound id 95279 - CYTARABINE,Compound id 154683 - SUNITINIB,Compound id 379664 - IDELALISIB,Compound id 429624 - SORAFENIB,Compound id 490791 - METHOTREXATE,Compound id 501089 - DASATINIB,Compound id 1903831 - DEXAMETHASONE,Compound id 570936 - LEUCOVORIN,Compound id 632542 - METHYLPREDNISOLONE SODIUM SUCCINATE,Compound id 1791601 - METHYLPREDNISOLONE,Compou…
Korean Early Access Program	ATC Class - L01X - Other antineoplastic agents in atc	Leukemia		null	2007-05-01	Dasatinib	dasatinib, bms-354825, bms-354825 hydrate, bms-354825-03, dasatinib hydrate, dasatinib monohydrate, sprycel	1	NCT00454753	null		Compound id 501089 - DASATINIB
Cetuximab and/or Dasatinib in Patients With Colorectal Cancer and Liver Metastases That Can Be Removed by Surgery	ATC Class - L01X - Other antineoplastic agents in atc	Liver Metastases, Mucinous Adenocarcinoma of the Colon, Mucinous Adenocarcinoma of the Rectum, Recurrent Colon Cancer, Recurrent Rectal Cancer, Signet Ring Adenocarcinoma of the Colon, Signet Ring Adenocarcinoma of the Rectum, Stage IV Colon Cancer, Stage IV Rectal Cancer		2011-08-01	2009-12-01	cetuximab, dasatinib, laboratory biomarker analysis, therapeutic conventional surgery	dasatinib, bms-354825, bms-354825 hydrate, bms-354825-03, dasatinib hydrate, dasatinib monohydrate, sprycel, cetuximab, abp-494, c-225, c225, cetuximab (genetical recombination), cmab-009, cmab009, erbitux, imc-225, imc-c225, moab c225	1	NCT00835679	Early Phase 1	Early Phase 1	Compound id 501089 - DASATINIB,Compound id 2689082 - CETUXIMAB
Study to Assess Dasatinib in Patients With Core Binding Factors Acute Myelogenous Leukemia	ATC Class - L01X - Other antineoplastic agents in atc	Acute Myelogenous Leukemia		null	2007-04-01	dasatinib	dasatinib, bms-354825, bms-354825 hydrate, bms-354825-03, dasatinib hydrate, dasatinib monohydrate, sprycel	1	NCT02113319	Phase 2	Phase 2	Compound id 501089 - DASATINIB
Phase II Study of Dasatinib (BMS-354825) for Androgen-deprived Progressive Prostate Cancer	ATC Class - L01X - Other antineoplastic agents in atc	Prostate Cancer		2010-10-01	2007-01-01	dasatinib, dasatinib	dasatinib, bms-354825, bms-354825 hydrate, bms-354825-03, dasatinib hydrate, dasatinib monohydrate, sprycel	1	NCT00385580	Phase 2	Phase 2	Compound id 501089 - DASATINIB
Valproic Acid-Based 2-Agent Oral Regimens for Patients With Advanced Solid Tumor	ATC Class - L01X - Other antineoplastic agents in atc,ATC Class - N03A - Antiepileptics,ATC Class - L04A - Immunosuppressants	Solid Tumors		null	2007-06-01	Dasatinib, Erlotinib, Lapatinib, Lenalidomide, Sorafenib, Sunitinib, Valproic Acid	valproic acid, 44089, convulex, depakote, depakene, nsc-93819, stavzor, valproic, erlotinib, osi-774, ro-508231, cp-358,774, cp-358774, cp-35877401, r-1415, rg-1415, tarceva, sunitinib, sutent, su-011248, su-11248, su011248, sorafenib, bay 43-9006, bay-43-9006, nexavar, dasatinib, bms-354825, bms-354825 hydrate, bms-354825-03, dasatinib hydrate, dasatinib monohydrate, sprycel, lapatinib, gw-2016,…	1	NCT00495872	Phase 1	Phase 1	Compound id 45378 - VALPROIC ACID,Compound id 141944 - ERLOTINIB,Compound id 154683 - SUNITINIB,Compound id 429624 - SORAFENIB,Compound id 501089 - DASATINIB,Compound id 810723 - LAPATINIB,Compound id 1113909 - LENALIDOMIDE
Precision Diagnosis Directing HDACi and TKI Target Therapy for Adult Ph-like ALL	ATC Class - L01X - Other antineoplastic agents in atc	Leukemia, Leukemia, Acute, Leukemia, B-cell, Leukemia, Lymphoblastic		2020-08-01	2016-02-01	Chidamide, Dasatinib	tucidinostat, chidamide, cs-055, cs055, epidaza in china, hbi-8000, dasatinib, bms-354825, bms-354825 hydrate, bms-354825-03, dasatinib hydrate, dasatinib monohydrate, sprycel	1	NCT03564470	Phase 2	Phase 2	Compound id 213962 - TUCIDINOSTAT,Compound id 501089 - DASATINIB
A Study of Dasatinib as First-line Treatment for Newly Diagnosed Chronic-Phase Chronic Myeloid Leukemia (CML-CP)	ATC Class - L01X - Other antineoplastic agents in atc,ATC Class - V07A - All other non-therapeutic products	Chronic Myelogenous Leukemia - Chronic Phase		2019-12-01	2016-05-01	Dasatinib Tablets	dasatinib, bms-354825, bms-354825 hydrate, bms-354825-03, dasatinib hydrate, dasatinib monohydrate, sprycel	1	NCT04925141	Phase 4	Phase 4	Compound id 501089 - DASATINIB
Dasatinib in Treating Patients With Metastatic Pancreatic Cancer	ATC Class - L01X - Other antineoplastic agents in atc	Adenocarcinoma of the Pancreas, Recurrent Pancreatic Cancer, Stage IV Pancreatic Cancer		2014-02-01	2007-05-01	dasatinib, laboratory biomarker analysis, physiologic testing	dasatinib, bms-354825, bms-354825 hydrate, bms-354825-03, dasatinib hydrate, dasatinib monohydrate, sprycel	1	NCT00474812	Phase 2	Phase 2	Compound id 501089 - DASATINIB
A Study of Dasatinib in Patients With Imatinib Resistant or Intolerant Chronic Myeloid Leukemia	ATC Class - L01X - Other antineoplastic agents in atc	Chronic Myeloid Leukemia		2012-06-01	2009-03-01	dasatinib	dasatinib, bms-354825, bms-354825 hydrate, bms-354825-03, dasatinib hydrate, dasatinib monohydrate, sprycel	1	NCT00866736	Phase 2	Phase 2	Compound id 501089 - DASATINIB
Study of Dasatinib and All-Trans Retinoic Acid for Relapsed/Refractory and/or Elderly Patients With Acute Myelogenous Leukemia (AML) or Myelodysplastic Syndrome	ATC Class - L01X - Other antineoplastic agents in atc,ATC Class - D10A - Anti-acne preparations for topical use	Acute Myelogenous Leukemia, Myelodysplastic Syndrome		2016-02-01	2011-04-01	all trans retinoic acid (VESANOID), dasatinib (SPRYCEL)	dasatinib, bms-354825, bms-354825 hydrate, bms-354825-03, dasatinib hydrate, dasatinib monohydrate, sprycel, tretinoin, tretin-x, acticin, altreno, atralin, avita, nsc-122758, retin-a micro, retin-a-micro, retinoic acid, renova, retin-a, vesanoid	1	NCT00892190	Phase 1	Phase 1	Compound id 501089 - DASATINIB,Compound id 1305739 - TRETINOIN
Ruxolitinib in Treating Participants With Chronic Myeloid Leukemia With Minimal Residual Disease While on Therapy With Tyrosine Kinase Inhibitors	ATC Class - L01X - Other antineoplastic agents in atc	Chronic Myelogenous Leukemia, BCR-ABL1 Positive, Chronic Myelogenous Leukemia, BCR-ABL1 Positive in Remission, Minimal Residual Disease, Philadelphia Chromosome Positive, BCR-ABL1 Positive Chronic Myelogenous Leukemia		2019-09-01	2013-07-01	Dasatinib, Imatinib Mesylate, Nilotinib, Ruxolitinib	dasatinib, bms-354825, bms-354825 hydrate, bms-354825-03, dasatinib hydrate, dasatinib monohydrate, sprycel, imatinib, gleevec, sti-571, nilotinib, amn 107, amn-107, amn107, tasigna, imatinib mesilate, imatinib mesylate, glivec, imatinib methanesulfonate, qti-571, qti571, sti 571, sti571, ruxolitinib, inc-424, inc424, incb-018424, incb-18424, incb018424, jakavi	1	NCT01751425	Phase 1	Phase 1	Compound id 501089 - DASATINIB,Compound id 713353 - IMATINIB,Compound id 794721 - NILOTINIB,Compound id 864374 - IMATINIB MESYLATE,Compound id 1406851 - RUXOLITINIB
A Phase 1B Study to Investigate the Safety and Preliminary Efficacy for the Combination of Dasatinib Plus Nivolumab in Patients With Chronic Myeloid Leukemia	ATC Class - L01X - Other antineoplastic agents in atc	Chronic Myeloid Leukemia		2018-12-01	2014-02-01	Dasatinib, Nivolumab	dasatinib, bms-354825, bms-354825 hydrate, bms-354825-03, dasatinib hydrate, dasatinib monohydrate, sprycel, nivolumab, bms-936558, bms-986298, mdx-1106, ono-4538, opdivo	1	NCT02011945	Phase 1	Phase 1	Compound id 501089 - DASATINIB,Compound id 2741388 - NIVOLUMAB
Dasatinib in Treating Patients With Previously Treated Metastatic Colorectal Cancer	ATC Class - L01X - Other antineoplastic agents in atc	Recurrent Colon Cancer, Recurrent Rectal Cancer, Stage IV Colon Cancer, Stage IV Rectal Cancer		2011-06-01	2007-07-01	dasatinib, laboratory biomarker analysis	dasatinib, bms-354825, bms-354825 hydrate, bms-354825-03, dasatinib hydrate, dasatinib monohydrate, sprycel	1	NCT00504153	Phase 2	Phase 2	Compound id 501089 - DASATINIB
Phase I Study of Dasatinib (BMS-354825) and Capecitabine for Women With Advanced Breast Cancer	ATC Class - L01X - Other antineoplastic agents in atc,ATC Class - L01B - Antimetabolites	Advanced Breast Cancer		2012-10-01	2007-06-01	Capecitabine, Dasatinib	dasatinib, bms-354825, bms-354825 hydrate, bms-354825-03, dasatinib hydrate, dasatinib monohydrate, sprycel, capecitabine, xeloda, ro 09-1978/000, ro-09-1978000, ro-091978000	1	NCT00452673	Phase 1	Phase 1	Compound id 501089 - DASATINIB,Compound id 1614588 - CAPECITABINE
Dasatinib Combination for Chronic Lymphocytic Leukemia(CLL) With Refractory Disease	ATC Class - L01X - Other antineoplastic agents in atc	Chronic Lymphocytic Leukemia		2016-01-01	2008-10-01	Dasatinib	dasatinib, bms-354825, bms-354825 hydrate, bms-354825-03, dasatinib hydrate, dasatinib monohydrate, sprycel	1	NCT01051115	Phase 2	Phase 2	Compound id 501089 - DASATINIB
BMS-354825 in Patients With Chronic Accelerated, or Blast Phase Chronic Myelogenous Leukemia or Philadelphia Positive Acute Lymphoblastic Leukemia	ATC Class - L01X - Other antineoplastic agents in atc	Leukemia, Lymphoblastic, Acute, Philadelphia-positive, Leukemia, Myeloid, Chronic-phase		2006-03-01	2003-11-01	Dasatinib	dasatinib, bms-354825, bms-354825 hydrate, bms-354825-03, dasatinib hydrate, dasatinib monohydrate, sprycel	1	NCT00103701	Phase 1	Phase 1	Compound id 501089 - DASATINIB
Post-Frontline Sequential Treatment of Adult Philadelphia Chromosome-Positive Acute Lymphoblastic Leukemia	ATC Class - L01X - Other antineoplastic agents in atc	Acute Lymphoblastic Leukemia		2023-03-01	2018-12-01	Dasatinib and blinatumomab	dasatinib, bms-354825, bms-354825 hydrate, bms-354825-03, dasatinib hydrate, dasatinib monohydrate, sprycel, blinatumomab, medi-538, mt-103, blincyto	1	NCT03318770	null		Compound id 501089 - DASATINIB,Compound id 2728594 - BLINATUMOMAB
Treatment With Dasatinib in Patients With Acral Lentiginous, Mucosal, or Chronic Sun-damaged Melanoma	ATC Class - L01X - Other antineoplastic agents in atc	Melanoma		2014-08-01	2011-03-01	Dasatinib, Surgical Resection	dasatinib, bms-354825, bms-354825 hydrate, bms-354825-03, dasatinib hydrate, dasatinib monohydrate, sprycel	1	NCT01092728	Phase 2	Phase 2	Compound id 501089 - DASATINIB
Dose Individualization of Antineoplastic Drugs and Anti-Infective Drug in Children With Hematoplastic Disease	ATC Class - L01X - Other antineoplastic agents in atc,ATC Class - B02B - Vitamin k and other hemostatics	Hematological Neoplasms		2021-12-01	2016-01-01	Anti-Infective Drugs, Bortezomib, Eltrombopag, Imatinib, PEGylated Recombinant Human Granulocyte Colony-Stimulating Factor, Pegaspargase, dasatinib	dasatinib, bms-354825, bms-354825 hydrate, bms-354825-03, dasatinib hydrate, dasatinib monohydrate, sprycel, eltrombopag, revolade, sb497115, imatinib, gleevec, sti-571, bortezomib, velcade, bortezomib hydrate, ldp-341, nsc-681239, ps-341, pegaspargase, asparaginase compd with polyethylene glycol, asparaginase e. coli compd with polyethylene glycol, oncaspar	1	NCT03844360	Phase 4	Phase 4	Compound id 501089 - DASATINIB,Compound id 523142 - ELTROMBOPAG,Compound id 713353 - IMATINIB,Compound id 1901573 - BORTEZOMIB,Compound id 2741195 - PEGASPARGASE
Selecting Patient-Specific Biologically Targeted Therapy for Pediatric Patients With Refractory Or Recurrent Brain Tumors	ATC Class - L01X - Other antineoplastic agents in atc,ATC Class - L04A - Immunosuppressants,ATC Class - L01C - Plant alkaloids and other natural products, antineoplastic drugs,ATC Class - L01A - Alkylating agents,ATC Class - J07B - Viral vaccines	Recurrent Childhood Brain Tumor		2017-12-01	2013-12-01	Dasatinib, Erlotinib, Etoposide, Everolimus, Sorafenib, Temozolomide, Tumor biology testing	temozolomide, m&b-39831, ccrg-81045, m&b 39831, m-39831, nsc-362856, sch 52365, sch-52365, temodal, temomedac, temodar, erlotinib, osi-774, ro-508231, cp-358,774, cp-358774, cp-35877401, r-1415, rg-1415, tarceva, sorafenib, bay 43-9006, bay-43-9006, nexavar, dasatinib, bms-354825, bms-354825 hydrate, bms-354825-03, dasatinib hydrate, dasatinib monohydrate, sprycel, etoposide, etoposide resolution…	1	NCT02015728	null		Compound id 27258 - TEMOZOLOMIDE,Compound id 141944 - ERLOTINIB,Compound id 429624 - SORAFENIB,Compound id 501089 - DASATINIB,Compound id 866156 - ETOPOSIDE,Compound id 1012475 - EVEROLIMUS
A Study of Dasatinib vs. High-Dose Imatinib (600 mg) in Patients With Chronic Phase Chronic Myeloid Leukemia (CML) Who Failed to Achieve Complete Cytogenetic Response After 3-18 Months of Imatinib Therapy	ATC Class - L01X - Other antineoplastic agents in atc	Leukemia		2008-06-01	2007-04-01	Dasatinib, Imatinib	dasatinib, bms-354825, bms-354825 hydrate, bms-354825-03, dasatinib hydrate, dasatinib monohydrate, sprycel, imatinib, gleevec, sti-571	1	NCT00362466	Phase 3	Phase 3	Compound id 501089 - DASATINIB,Compound id 713353 - IMATINIB
Study of Frontline Dasatinib Plus Chemotherapy in Philadelphia Chromosome Positive Acute Lymphoblastic Leukemia (PH+ALL)	ATC Class - L01X - Other antineoplastic agents in atc	Philadelphia Positive Acute Lymphoblastic Leukemia		2015-09-01	2011-11-01	Dasatinib	dasatinib, bms-354825, bms-354825 hydrate, bms-354825-03, dasatinib hydrate, dasatinib monohydrate, sprycel	1	NCT01724879	Phase 2	Phase 2	Compound id 501089 - DASATINIB
A Study of Dasatinib and Rituximab for Relapsed/Refractory Chronic Lymphocytic Leukemia	ATC Class - L01X - Other antineoplastic agents in atc	Chronic Lymphocytic Leukemia		2012-04-01	2009-05-01	Dasatinib and Rituximab	dasatinib, bms-354825, bms-354825 hydrate, bms-354825-03, dasatinib hydrate, dasatinib monohydrate, sprycel, rituximab, abp-798, abp798, ct-p10, hs-006, hs-006 (rituximab biosimilar), hs006, idec-102, idec-c2b8, mabthera, mabthera rituxan, r-105 idec-102, rg-105, rhcacd20ma, rituximab (genetical recombination), rituxan, sait-101, sait101, usp mab 001, monoclonal igg1, truxima, rituximab-abbs	1	NCT00949988	Phase 1	Phase 1	Compound id 501089 - DASATINIB,Compound id 2689081 - RITUXIMAB
Venetoclax, Dasatinib, Prednisone, and Rituximab for the Treatment of Newly Diagnosed or Relapsed Philadelphia Chromosome Positive Acute Lymphoblastic Leukemia	ATC Class - L01X - Other antineoplastic agents in atc,ATC Class - L04A - Immunosuppressants,ATC Class - L01B - Antimetabolites,ATC Class - A07E - Intestinal antiinflammatory agents,ATC Class - H02A - Corticosteroids for systemic use, plain,ATC Class - V07A - All other non-therapeutic products	B Acute Lymphoblastic Leukemia, Recurrent B Acute Lymphoblastic Leukemia		2026-05-01	2021-08-01	Dasatinib, Methotrexate, Prednisone, Rituximab, Venetoclax	methotrexate, abitrexate, folex, mexate, mexate-aq, trexall, amethopterin, tcmdc-123832, tcmdc-125488, tcmdc-125858, adx-2191, cl 14377, cl-14377, ebetrex, emt-25299, emtexate high-pot, emtexate pf, maxtrex, methylaminopterin, metoject, nsc-740, otrexup, otrexup pfs, r-9985, r-methotrexate, rasuvo, reditrex, rheumatrex, zlatal, dasatinib, bms-354825, bms-354825 hydrate, bms-354825-03, dasatinib h…	1	NCT04872790	Phase 1	Phase 1	Compound id 490791 - METHOTREXATE,Compound id 501089 - DASATINIB,Compound id 990201 - VENETOCLAX,Compound id 1688535 - PREDNISONE,Compound id 2689081 - RITUXIMAB
Study of Oral Dasatinib in Subjects With Myelodysplastic Syndrome (MDS) and Excess Marrow Blasts	ATC Class - L01X - Other antineoplastic agents in atc	Myelodysplastic Syndromes		2012-05-01	2008-02-01	Dasatinib	dasatinib, bms-354825, bms-354825 hydrate, bms-354825-03, dasatinib hydrate, dasatinib monohydrate, sprycel	1	NCT00624585	null		Compound id 501089 - DASATINIB
Dasatinib in Treating Patients With Relapsed Small Cell Lung Cancer	ATC Class - L01X - Other antineoplastic agents in atc	Extensive Stage Small Cell Lung Cancer, Limited Stage Small Cell Lung Cancer, Recurrent Small Cell Lung Cancer		2013-04-01	2007-04-01	dasatinib	dasatinib, bms-354825, bms-354825 hydrate, bms-354825-03, dasatinib hydrate, dasatinib monohydrate, sprycel	1	NCT00470054	Phase 2	Phase 2	Compound id 501089 - DASATINIB
Dasatinib in Resectable Malignant Pleural Mesothelioma	ATC Class - L01X - Other antineoplastic agents in atc	Malignant Pleural Mesothelioma		2019-03-01	2008-03-01	Dasatinib	dasatinib, bms-354825, bms-354825 hydrate, bms-354825-03, dasatinib hydrate, dasatinib monohydrate, sprycel	1	NCT00652574	Phase 1	Phase 1	Compound id 501089 - DASATINIB
A Phase II Evaluation of Dasatinib (SprycelÂ®, NSC #732517) in the Treatment of Persistent or Recurrent Epithelial Ovarian, Fallopian Tube, or Primary Peritoneal Carcinoma	ATC Class - L01X - Other antineoplastic agents in atc	Recurrent Fallopian Tube Carcinoma, Recurrent Ovarian Carcinoma, Recurrent Primary Peritoneal Carcinoma		null	2008-06-01	Dasatinib, Laboratory Biomarker Analysis	dasatinib, bms-354825, bms-354825 hydrate, bms-354825-03, dasatinib hydrate, dasatinib monohydrate, sprycel	1	NCT00671788	Phase 2	Phase 2	Compound id 501089 - DASATINIB
De- Escalation and Stopping Treatment of Imatinib, Nilotinib or sprYcel in Chronic Myeloid Leukaemia	ATC Class - L01X - Other antineoplastic agents in atc	Chronic Myeloid Leukaemia		2018-05-01	2013-12-01	Imatinib, dasatinib, nilotinib	dasatinib, bms-354825, bms-354825 hydrate, bms-354825-03, dasatinib hydrate, dasatinib monohydrate, sprycel, imatinib, gleevec, sti-571, nilotinib, amn 107, amn-107, amn107, tasigna	1	NCT01804985	Phase 2	Phase 2	Compound id 501089 - DASATINIB,Compound id 713353 - IMATINIB,Compound id 794721 - NILOTINIB
Study of Pts With Philadelphia Chromosome-Pos ALL With Comb of Ibrutinib, Dasatinib, and Prednisone	ATC Class - L01X - Other antineoplastic agents in atc,ATC Class - A07E - Intestinal antiinflammatory agents,ATC Class - H02A - Corticosteroids for systemic use, plain,ATC Class - V07A - All other non-therapeutic products	Acute Lymphoblastic Leukemia		2018-01-01	2016-09-01	Dasatinib, Ibrutinib, Prednisone	dasatinib, bms-354825, bms-354825 hydrate, bms-354825-03, dasatinib hydrate, dasatinib monohydrate, sprycel, ibrutinib, cra-032765, imbruvica, pc-32765, pci 32765, pci-32765, pci-32765-00, prednisone, sterapred, cortan, cortancyl, decortisyl, delta-dome, deltasone, fernisone, liquid pred, lodotra, meticorten, nsc-10023, orasone, paracort, prednicen-m, prednisone intensol, prednisone tablets, rayo…	1	NCT02815059	Phase 1	Phase 1	Compound id 501089 - DASATINIB,Compound id 503835 - IBRUTINIB,Compound id 1688535 - PREDNISONE
Dasatinib for the Prevention of Oxaliplatin-Induced Neuropathy in Patients With Metastatic Gastrointestinal Cancer Receiving FOLFOX Chemotherapy With or Without Bevacizumab	ATC Class - L01X - Other antineoplastic agents in atc,ATC Class - L01B - Antimetabolites,ATC Class - V03A - All other therapeutic products,ATC Class - A12A - Calcium supplements,ATC Class - B03B - Vitamin b12 and folic acid,ATC Class - M05B - Drugs affecting bone structure and mineralization,ATC Class - J07B - Viral vaccines	Advanced Colorectal Carcinoma, Bile Duct Cancer, Esophageal Cancer, Gall Bladder Cancer, Gastric Cancer, Metastatic Colorectal Carcinoma, Pancreatic Cancer, Small Bowel Adenocarcinoma, Stage II Colon Cancer, Stage II Rectal Cancer, Stage III Colon Cancer, Stage III Rectal Cancer, Stage IV Colorectal Cancer AJCC v8, Stage IVA Colorectal Cancer AJCC v8, Stage IVB Colorectal Cancer AJCC v8, Stage IV…		2021-12-01	2020-09-01	Bevacizumab, Dasatinib, Fluorouracil, Leucovorin, Leucovorin Calcium, Oxaliplatin, Quality-of-Life Assessment	fluorouracil, 5-fu, 5-fluorouracil, 5 fu, 5.f.u., accusite, actikerall, adrucil, carac, efudix, efudex, fluoro-uracil roche, fluracil, fluoroplex, nsc-19893, ro 2-9757, ro-2-9757, ro-29757, tolak, dasatinib, bms-354825, bms-354825 hydrate, bms-354825-03, dasatinib hydrate, dasatinib monohydrate, sprycel, leucovorin, leucovorin calcium, fusilev, calc folinate, calcium folinate, calcium folinate pe…	1	NCT04164069	Phase 1	Phase 1	Compound id 23643 - FLUOROURACIL,Compound id 501089 - DASATINIB,Compound id 570936 - LEUCOVORIN,Compound id 632578 - LEUCOVORIN CALCIUM,Compound id 2689088 - BEVACIZUMAB,Compound id 2805075 - OXALIPLATIN
Maximal Androgen Depletion Followed by Randomization of Maximal Androgen Ablation With Molecular Targeted Therapies	ATC Class - L01X - Other antineoplastic agents in atc,ATC Class - A07E - Intestinal antiinflammatory agents,ATC Class - H02A - Corticosteroids for systemic use, plain,ATC Class - L02B - Hormone antagonists and related agents,ATC Class - V07A - All other non-therapeutic products	Prostate Cancer		2021-12-01	2011-03-01	Abiraterone Acetate, Dasatinib, Prednisone, Sunitinib	abiraterone acetate, cb-7630, cb7630, yonsa, zytiga, sunitinib, sutent, su-011248, su-11248, su011248, dasatinib, bms-354825, bms-354825 hydrate, bms-354825-03, dasatinib hydrate, dasatinib monohydrate, sprycel, prednisone, sterapred, cortan, cortancyl, decortisyl, delta-dome, deltasone, fernisone, liquid pred, lodotra, meticorten, nsc-10023, orasone, paracort, prednicen-m, prednisone intensol, p…	1	NCT01254864	Phase 2	Phase 2	Compound id 153054 - ABIRATERONE ACETATE,Compound id 154683 - SUNITINIB,Compound id 501089 - DASATINIB,Compound id 1688535 - PREDNISONE,Compound id 1722972 - ABIRATERONE
Dasatinib In WaldenstrÃ¶m Macroglobulinemia	ATC Class - L01X - Other antineoplastic agents in atc	DASATINIB, Waldenstrom Macroglobulinemia		2024-03-01	2019-11-01	Dasatinib	dasatinib, bms-354825, bms-354825 hydrate, bms-354825-03, dasatinib hydrate, dasatinib monohydrate, sprycel	1	NCT04115059	Phase 1	Phase 1	Compound id 501089 - DASATINIB
Ruxolitinib Phosphate or Dasatinib With Chemotherapy in Treating Patients With Relapsed or Refractory Philadelphia Chromosome-Like Acute Lymphoblastic Leukemia	ATC Class - R01A - Decongestants and other nasal preparations for topical use,ATC Class - A01A - Stomatological preparations,ATC Class - S01B - Antiinflammatory agents, ophthalmologic,ATC Class - S03B - Corticosteroid ophthalmologic and otologic preparations,ATC Class - D07A - Corticosteroid dermatological preparations, plain,ATC Class - D10A - Anti-acne preparations for topical use,ATC Class - C…	Recurrent B Acute Lymphoblastic Leukemia, Recurrent Ph-Like Acute Lymphoblastic Leukemia, Refractory B Acute Lymphoblastic Leukemia, Refractory Ph-Like Acute Lymphoblastic Leukemia		2021-01-01	2015-07-01	Cyclophosphamide, Cytarabine, Dasatinib, Dexamethasone, Doxorubicin, Laboratory Biomarker Analysis, Leucovorin, Mercaptopurine, Methotrexate, Prednisone, Rituximab, Ruxolitinib Phosphate, Vincristine	mercaptopurine, 6-mercaptopurine, 6-mercaptopurine monohydrate, mercaptopurine anhydrous, mercaptopurine hydrate, nsc-755, puri-nethol, purixan, purinethol, xaluprine, cyclophosphamide, b-518, cyclophosphamide anhydrous, cyclophosphamide hydrate, cyclophosphamide monohydrate, cytoxan (lyophilized), cytoxan, endoxana, lyophilized cytoxan, neosar, nsc-26271, cytarabine, tarabine pfs, alexan, alexan…	1	NCT02420717	Phase 2	Phase 2	Compound id 3227 - MERCAPTOPURINE,Compound id 51794 - CYCLOPHOSPHAMIDE,Compound id 95279 - CYTARABINE,Compound id 490791 - METHOTREXATE,Compound id 501089 - DASATINIB,Compound id 1903831 - DEXAMETHASONE,Compound id 570936 - LEUCOVORIN,Compound id 791569 - DOXORUBICIN,Compound id 986271 - VINCRISTINE,Compound id 1406851 - RUXOLITINIB,Compound id 1688535 - PREDNISONE,Compound id 1908137 - RUXOLITIN…
Phase II Short-term Adjuvant Therapy and Biomarker Studies With Targeted Agents in Women With Estrogen Receptor Negative Breast Cancer	ATC Class - L01X - Other antineoplastic agents in atc	Breast Cancer		2022-01-01	2014-01-01	Dasatinib	dasatinib, bms-354825, bms-354825 hydrate, bms-354825-03, dasatinib hydrate, dasatinib monohydrate, sprycel	1	NCT01471106	Phase 2	Phase 2	Compound id 501089 - DASATINIB
Low Dose Dasatinib (50 mg Daily) as First-line Treatment for Newly Diagnosed Chronic-Phase Chronic Myeloid Leukemia	ATC Class - L01X - Other antineoplastic agents in atc	Chronic Myelogenous Leukemia		2023-07-01	2018-11-01	Dasatinib	dasatinib, bms-354825, bms-354825 hydrate, bms-354825-03, dasatinib hydrate, dasatinib monohydrate, sprycel	1	NCT03625388	Phase 2	Phase 2	Compound id 501089 - DASATINIB
Phase I Study of Dasatinib (BMS-354825) and Imatinib in Subjects With Chronic Myeloid Leukemia in Chronic Phase	ATC Class - L01X - Other antineoplastic agents in atc,ATC Class - G02A - Uterotonics	Myeloid Leukemia, Chronic, Chronic-Phase		null	2006-08-01	Dasatinib in combination with imatinib	dasatinib, bms-354825, bms-354825 hydrate, bms-354825-03, dasatinib hydrate, dasatinib monohydrate, sprycel, imatinib, gleevec, sti-571	1	NCT00324077	Phase 1	Phase 1	Compound id 501089 - DASATINIB,Compound id 713353 - IMATINIB

## Sheet: Temsirolimus
BRIEF_TITLE	ATC_CLASSES	DISEASES	DISEASE_SYNONYMS	FINISH_DATE	START_DATE	INTERVENTION	INTERVENTION_SYNONYMS	IS_INTERVENTIONAL	NCT_ID	PHASE	PHASES	COMPOUNDS
Study Evaluating Temsirolimus in Advanced Stage Squamous Cell Carcinoma of the Head & Neck	ATC Class - L01X - Other antineoplastic agents in atc	Squamous Cell Carcinoma		2007-02-01	2005-04-01	Temsirolimus	temsirolimus, cci-779, torisel	1	NCT00195299	null		Compound id 1039526 - TEMSIROLIMUS
Combination of Temsirolimus and Sorafenib in the Treatment of Radioactive Iodine Refractory Thyroid Cancer	ATC Class - L01X - Other antineoplastic agents in atc	Thyroid Cancer		2018-01-01	2009-12-01	Temsirolimus and Sorafenib	sorafenib, bay 43-9006, bay-43-9006, nexavar, temsirolimus, cci-779, torisel	1	NCT01025453	Phase 2	Phase 2	Compound id 429624 - SORAFENIB,Compound id 1039526 - TEMSIROLIMUS
Cixutumumab and Temsirolimus in Treating Younger Patients With Recurrent or Refractory Sarcoma	ATC Class - L01X - Other antineoplastic agents in atc	Childhood Alveolar Soft Part Sarcoma, Childhood Angiosarcoma, Childhood Epithelioid Sarcoma, Childhood Fibrosarcoma, Childhood Gliosarcoma, Childhood Leiomyosarcoma, Childhood Liposarcoma, Childhood Malignant Peripheral Nerve Sheath Tumor, Childhood Synovial Sarcoma, Previously Treated Childhood Rhabdomyosarcoma, Recurrent Childhood Rhabdomyosarcoma, Recurrent Childhood Soft Tissue Sarcoma, Recur…		2014-04-01	2012-06-01	Cixutumumab, Laboratory Biomarker Analysis, Temsirolimus	temsirolimus, cci-779, torisel, cixutumumab, imc-a12, nsc-742460	1	NCT01614795	Phase 2	Phase 2	Compound id 1039526 - TEMSIROLIMUS,Compound id 2728603 - CIXUTUMUMAB
Study of Inotuzumab Ozogamicin + Temsirolimus in Patients With Relapsed or Refractory CD22+ B-cell NHLymphoma	ATC Class - L01X - Other antineoplastic agents in atc	B-cell Lymphoma Refractory		2016-06-01	2011-12-01	Inotuzumab Ozogamicin, Temsirolimus	temsirolimus, cci-779, torisel, ozogamicin, inotuzumab ozogamicin, besponsa, cmc-544, pf-05208773, way-207294, way-207294 cmc-544, inotuzumab, g544	1	NCT01535989	Phase 1	Phase 1	Compound id 1039526 - TEMSIROLIMUS,Compound id 2740714 - OZOGAMICIN,Compound id 2741260 - INOTUZUMAB OZOGAMICIN,Compound id 2817475 - INOTUZUMAB
Phase I Study of Docetaxel and Temsirolimus in Resistant Solid Malignancies	ATC Class - L01X - Other antineoplastic agents in atc,ATC Class - L01C - Plant alkaloids and other natural products, antineoplastic drugs	Resistant Solid Malignancies		2011-06-01	2008-03-01	Docetaxel, Temsirolimus	docetaxel, bind 014, ckd-810, docefrez, docetaxel anhydrous, docetaxel hydrate, docetaxel trihydrate, nsc-628503, rp 56976, rp-56976, taxceus, taxotere, xrp6976, temsirolimus, cci-779, torisel	1	NCT00703625	Phase 1	Phase 1	Compound id 990319 - DOCETAXEL,Compound id 1039526 - TEMSIROLIMUS
Cixutumumab and Temsirolimus in Treating Patients With Locally Recurrent or Metastatic Breast Cancer	ATC Class - L01X - Other antineoplastic agents in atc	Male Breast Carcinoma, Recurrent Breast Carcinoma, Stage IV Breast Cancer AJCC v6 and v7		2018-02-01	2008-10-01	Cixutumumab, Laboratory Biomarker Analysis, Pharmacological Study, Temsirolimus	temsirolimus, cci-779, torisel, cixutumumab, imc-a12, nsc-742460	1	NCT00699491	Phase 1	Phase 1	Compound id 1039526 - TEMSIROLIMUS,Compound id 2728603 - CIXUTUMUMAB
Efficacy Study of Temsirolimus to Treat Head and Neck Cancer	ATC Class - L01X - Other antineoplastic agents in atc	Head and Neck Squamous Cell Carcinoma		2012-03-01	2010-06-01	Temsirolimus	temsirolimus, cci-779, torisel	1	NCT01172769	Phase 2	Phase 2	Compound id 1039526 - TEMSIROLIMUS
Registry For Temsirolimus, Sunitinib, And Axitinib Treated Patients With Metastatic Renal Cell Carcinoma (mRCC), Mantle Cell Lymphoma (MCL), And Gastro-Intestinal Stroma Tumor (GIST) [STAR-TOR]	ATC Class - L01X - Other antineoplastic agents in atc	Carcinoma, Renal Cell, Advanced, Gastrointestinal Stroma Tumors, Lymphoma, Mantle-Cell		2023-12-01	2008-01-01	Axitinib, Sunitinib, Sunitinib, Temsirolimus, Temsirolimus	sunitinib, sutent, su-011248, su-11248, su011248, temsirolimus, cci-779, torisel, axitinib, ag-013736, ag-13736, inlyta	1	NCT00700258	null		Compound id 154683 - SUNITINIB,Compound id 1039526 - TEMSIROLIMUS,Compound id 1927385 - AXITINIB
Paclitaxel, Carboplatin, and Bevacizumab or Paclitaxel, Carboplatin, and Temsirolimus or Ixabepilone, Carboplatin, and Bevacizumab in Treating Patients With Stage III, Stage IV, or Recurrent Endometrial Cancer	ATC Class - L01D - Cytotoxic antibiotics and related substances,ATC Class - L01X - Other antineoplastic agents in atc,ATC Class - L01C - Plant alkaloids and other natural products, antineoplastic drugs,ATC Class - J07B - Viral vaccines	Endometrial Adenocarcinoma, Endometrial Adenosquamous Carcinoma, Endometrial Clear Cell Adenocarcinoma, Endometrial Serous Adenocarcinoma, Recurrent Uterine Corpus Cancer, Stage IIIA Uterine Corpus Cancer AJCC v7, Stage IIIB Uterine Corpus Cancer AJCC v7, Stage IIIC Uterine Corpus Cancer AJCC v7, Stage IVA Uterine Corpus Cancer AJCC v7, Stage IVB Uterine Corpus Cancer AJCC v7		null	2009-09-01	Bevacizumab, Carboplatin, Ixabepilone, Laboratory Biomarker Analysis, Paclitaxel, Temsirolimus	ixabepilone, ixempra, bms 247550-01, bms-247550, bms-247550-01, ixempra kit, paclitaxel, abi-007, abi-007 component paclitaxel, abraxane, bms 181339-01, bms-181339-01, dhp 107, dhp-107, mbt 0206, mbt-0206, nk 105, nk-105, nsc-125973, pacitaxel, paxene, qw-8184, taxol, taxol 100, temsirolimus, cci-779, torisel, bevacizumab, 12-igg1, ava-1, avastin, bevacizumab beta, bi 695502, bs-503a, chs-5217, c…	1	NCT00977574	Phase 2	Phase 2	Compound id 632492 - IXABEPILONE,Compound id 991478 - PACLITAXEL,Compound id 1039526 - TEMSIROLIMUS,Compound id 2689088 - BEVACIZUMAB,Compound id 2702494 - CARBOPLATIN
Temsirolimus in Combination With Gemcitabine in Previously Untreated Metastatic Pancreatic Cancer	ATC Class - L01B - Antimetabolites,ATC Class - L01X - Other antineoplastic agents in atc	Pancreatic Adenocarcinoma		2009-10-01	2007-10-01	Gemcitabine, Temsirolimus	temsirolimus, cci-779, torisel, gemcitabine, gemzar, ly-188011, ly188011, nsc-613327	1	NCT00593008	Phase 1	Phase 1	Compound id 1039526 - TEMSIROLIMUS,Compound id 1072154 - GEMCITABINE
Metformin and Temsirolimus in Treating Patients With Metastatic or Unresectable Solid Tumor or Lymphoma	ATC Class - A10B - Blood glucose lowering drugs, excl. insulins,ATC Class - L01X - Other antineoplastic agents in atc	Breast Cancer, Endometrial Cancer, Kidney Cancer, Lung Cancer, Lymphoma, Unspecified Adult Solid Tumor, Protocol Specific		2010-08-01	2008-03-01	metformin hydrochloride, temsirolimus	metformin, la-6023, metformin hydrochloride, janumet, bolamyn sr, diagemet xl, ex-404, ex404, fortamet, glucamet 500, glucamet 850, glucient sr, glucophage sr, glucophage xr, glyformin, glucophage, glumetza, ledermetin, metabet sr, metsol, milform, nsc-91485, orabet, riomet er, riomet, sukkarto sr, temsirolimus, cci-779, torisel	1	NCT00659568	Phase 1	Phase 1	Compound id 23928 - METFORMIN,Compound id 56755 - METFORMIN HYDROCHLORIDE,Compound id 1039526 - TEMSIROLIMUS
Clofarabine and Temsirolimus in Treating Older Patients With Relapsed or Refractory Acute Myeloid Leukemia	ATC Class - L01X - Other antineoplastic agents in atc,ATC Class - L01B - Antimetabolites	Leukemia		2013-10-01	2008-12-01	clofarabine, temsirolimus	temsirolimus, cci-779, torisel, clofarabine, clolar, evoltra	1	NCT00775593	Phase 2	Phase 2	Compound id 1039526 - TEMSIROLIMUS,Compound id 1181061 - CLOFARABINE
Temsirolimus and Cetuximab in Patients With Advanced or Metastatic Solid Tumors	ATC Class - L01X - Other antineoplastic agents in atc	Patients With Advanced or Metastatic Solid Tumors		2016-10-01	2011-04-01	Cetuximab, Temsirolimus	temsirolimus, cci-779, torisel, cetuximab, abp-494, c-225, c225, cetuximab (genetical recombination), cmab-009, cmab009, erbitux, imc-225, imc-c225, moab c225	1	NCT02215720	Phase 1	Phase 1	Compound id 1039526 - TEMSIROLIMUS,Compound id 2689082 - CETUXIMAB
A Study of Temsirolimus Plus Capecitabine in Patients With Advanced Cancer	ATC Class - L01X - Other antineoplastic agents in atc,ATC Class - L01B - Antimetabolites	Advanced Solid Tumors		2013-06-01	2010-07-01	Temsirolimus and capecitabine	temsirolimus, cci-779, torisel, capecitabine, xeloda, ro 09-1978/000, ro-09-1978000, ro-091978000	1	NCT01050985	Phase 1	Phase 1	Compound id 1039526 - TEMSIROLIMUS,Compound id 1614588 - CAPECITABINE
A Phase I Study of IMC-A12 in Combination With Temsirolimus in Pediatric Patients With Recurrent or Refractory Solid Tumors	ATC Class - L01X - Other antineoplastic agents in atc	Brain Stem Neoplasms, Glioma, Pinealoma		2012-04-01	2010-07-01	IMC-A12, Temsirolimus	temsirolimus, cci-779, torisel, cixutumumab, imc-a12, nsc-742460	1	NCT01182883	Phase 1	Phase 1	Compound id 1039526 - TEMSIROLIMUS,Compound id 2728603 - CIXUTUMUMAB
CCI-779 and EKB-569 in Treating Patients With Advanced Solid Tumors	ATC Class - L01X - Other antineoplastic agents in atc	Unspecified Adult Solid Tumor, Protocol Specific		null	2004-10-01	pelitinib, temsirolimus	pelitinib, ekb-569, way-ekb-569, temsirolimus, cci-779, torisel	1	NCT00098501	Phase 1	Phase 1	Compound id 589322 - PELITINIB,Compound id 1039526 - TEMSIROLIMUS
Temsirolimus and Bevacizumab in Treating Patients With Stage III or Stage IV Malignant Melanoma	ATC Class - L01X - Other antineoplastic agents in atc,ATC Class - J07B - Viral vaccines	Recurrent Melanoma, Stage IIIB Skin Melanoma, Stage IIIC Skin Melanoma, Stage IV Skin Melanoma		2013-07-01	2008-01-01	Bevacizumab, Laboratory Biomarker Analysis, Temsirolimus, Therapeutic Conventional Surgery	temsirolimus, cci-779, torisel, bevacizumab, 12-igg1, ava-1, avastin, bevacizumab beta, bi 695502, bs-503a, chs-5217, ct-16, ct-p16, ct-p16 (biosimilar of bevacizumab), fkb-238, hlx-04, hlx04, ibi305, pf-06439535, r-435, rg-435, rhumab-, rhumab-vegf, usp mab 002, monoclonal igg1	1	NCT00397982	Phase 2	Phase 2	Compound id 1039526 - TEMSIROLIMUS,Compound id 2689088 - BEVACIZUMAB
Pazopanib Versus Temsirolimus in Poor-Risk Clear-Cell Renal Cell Carcinoma (RCC)	ATC Class - R06A - Antihistamines for systemic use,ATC Class - D04A - Antipruritics, incl. antihistamines, anesthetics, etc.,ATC Class - L01X - Other antineoplastic agents in atc,ATC Class - J07A - Bacterial vaccines	Kidney Cancer		2019-09-01	2012-10-01	Benadryl, Pazopanib, Quality of Life Assessment, Temsirolimus	pazopanib, gw786034, votrient, temsirolimus, cci-779, torisel, diphenhydramine, antitussive, beldin, belix, benadryl, benylin, dibenil, diphen, hydramine, silphen, diphenhydramine hydrochloride, alledryl, diphenhydramine hcl, dytuss, syntedril, benadryl preservative free, caladryl, coltex, dimedrol, diphenhydramine hydrochloride preservative free, dreemon, fedril, gppe cough expect paed, gppe ora…	1	NCT01392183	Phase 2	Phase 2	Compound id 340003 - PAZOPANIB,Compound id 1039526 - TEMSIROLIMUS,Compound id 1121855 - DIPHENHYDRAMINE,Compound id 1178260 - DIPHENHYDRAMINE HYDROCHLORIDE
Perifosine and Torisel (Temsirolimus) for Recurrent/Progressive Malignant Gliomas	ATC Class - L01X - Other antineoplastic agents in atc	Anaplastic Astrocytoma, Anaplastic Oligodendroglioma, Brain Tumor, Recurrent, Glioblastoma, Mixed Glioma		2022-08-01	2014-12-01	Cytoreductive surgery, Perifosine, Temsirolimus	perifosine, krx-0401, nsc-639966, temsirolimus, cci-779, torisel	1	NCT02238496	Phase 1	Phase 1	Compound id 336354 - PERIFOSINE,Compound id 1039526 - TEMSIROLIMUS
Temsirolimus in Treating Patients With Advanced Liver Cancer and Cirrhosis	ATC Class - L01X - Other antineoplastic agents in atc	Liver Cancer		null	2010-01-01	temsirolimus	temsirolimus, cci-779, torisel	1	NCT01079767	Phase 2	Phase 2	Compound id 1039526 - TEMSIROLIMUS
Torisel in Addition to Standard Chemotherapy With Radiation for Advanced Head and Neck Cancer	ATC Class - L01X - Other antineoplastic agents in atc,ATC Class - B02B - Vitamin k and other hemostatics	Head and Neck Cancer		null	2011-01-01	Cetuximab, Cisplatin, Radiation Therapy, Temsirolimus	temsirolimus, cci-779, torisel, cisplatin, cisplatinum, cis-diamminedichloroplatinum(ii), cis-ddp, cis-platinum ii, int-230-6 component cisplatin, int230-6 component cisplatin, liplacis, nsc-119875, platinol-aq, platinol, cetuximab, abp-494, c-225, c225, cetuximab (genetical recombination), cmab-009, cmab009, erbitux, imc-225, imc-c225, moab c225	1	NCT01326468	null		Compound id 1039526 - TEMSIROLIMUS,Compound id 2685970 - CISPLATIN,Compound id 2689082 - CETUXIMAB
Study Evaluating Temsirolimus (CCI-779) In Breast Neoplasms	ATC Class - L02B - Hormone antagonists and related agents,ATC Class - L01X - Other antineoplastic agents in atc	Breast Neoplasms		2009-10-01	2002-12-01	Letrozole, Letrozole / Temsirolimus (CCI-779), Letrozole / Temsirolimus (CCI-779)	temsirolimus, cci-779, torisel, letrozole, cgs 20267, cgs-20267, femara	1	NCT00062751	Phase 2	Phase 2	Compound id 1039526 - TEMSIROLIMUS,Compound id 1321721 - LETROZOLE
Sorafenib Combined With Erlotinib, Tipifarnib, or Temsirolimus in Treating Patients With Recurrent Glioblastoma Multiforme or Gliosarcoma	ATC Class - L01X - Other antineoplastic agents in atc	Adult Giant Cell Glioblastoma, Adult Glioblastoma, Adult Gliosarcoma, Recurrent Adult Brain Tumor		2012-09-01	2006-04-01	erlotinib hydrochloride, sorafenib tosylate, temsirolimus, tipifarnib	erlotinib, osi-774, ro-508231, cp-358,774, cp-358774, cp-35877401, r-1415, rg-1415, tarceva, erlotinib hydrochloride, cp-358, cp-358,774-01, cp-358774-01, sorafenib, bay 43-9006, bay-43-9006, nexavar, tipifarnib, r-11577, r-115777, r115777, sorafenib tosylate, bay 54-9085, bay-54-9085, sorafenib tosilate, temsirolimus, cci-779, torisel	1	NCT00335764	Phase 1	Phase 1	Compound id 141944 - ERLOTINIB,Compound id 260412 - ERLOTINIB HYDROCHLORIDE,Compound id 429624 - SORAFENIB,Compound id 564273 - TIPIFARNIB,Compound id 885050 - SORAFENIB TOSYLATE,Compound id 1039526 - TEMSIROLIMUS
CCI-779 in Treating Patients With Extensive-Stage Small Cell Lung Cancer	ATC Class - L01X - Other antineoplastic agents in atc	Extensive Stage Small Cell Lung Cancer		null	2002-02-01	laboratory biomarker analysis, pharmacological study, temsirolimus	temsirolimus, cci-779, torisel	1	NCT00028028	Phase 2	Phase 2	Compound id 1039526 - TEMSIROLIMUS
Temsirolimus in Treating Patients With Metastatic or Locally Advanced Recurrent Endometrial Cancer	ATC Class - L01X - Other antineoplastic agents in atc	Endometrial Adenocarcinoma, Endometrial Adenosquamous Cell Carcinoma, Endometrial Clear Cell Carcinoma, Endometrial Papillary Serous Carcinoma, Recurrent Endometrial Carcinoma, Stage IIIA Endometrial Carcinoma, Stage IIIB Endometrial Carcinoma, Stage IIIC Endometrial Carcinoma, Stage IVA Endometrial Carcinoma, Stage IVB Endometrial Carcinoma		2009-08-01	2004-05-01	laboratory biomarker analysis, temsirolimus	temsirolimus, cci-779, torisel	1	NCT00072176	Phase 2	Phase 2	Compound id 1039526 - TEMSIROLIMUS
Temsirolimus and Vinorelbine Ditartrate in Treating Patients With Unresectable or Metastatic Solid Tumors	ATC Class - L01X - Other antineoplastic agents in atc,ATC Class - L01C - Plant alkaloids and other natural products, antineoplastic drugs	Extensive Stage Small Cell Lung Cancer, Hereditary Paraganglioma, Male Breast Cancer, Malignant Paraganglioma, Metastatic Gastrointestinal Carcinoid Tumor, Metastatic Pheochromocytoma, Pancreatic Polypeptide Tumor, Recurrent Breast Cancer, Recurrent Cervical Cancer, Recurrent Endometrial Carcinoma, Recurrent Gastrointestinal Carcinoid Tumor, Recurrent Islet Cell Carcinoma, Recurrent Neuroendocrin…		2014-05-01	2010-06-01	temsirolimus, vinorelbine ditartrate	vinorelbine, vinorelbine base, vinorelbine tartrate, vinorelbine ditartarate, navelbine, tlc-178, tlc178, vinorelbine ditartrate, temsirolimus, cci-779, torisel	1	NCT01155258	Phase 1	Phase 1	Compound id 977032 - VINORELBINE,Compound id 1003857 - VINORELBINE TARTRATE,Compound id 1039526 - TEMSIROLIMUS
Irinotecan Hydrochloride and Temozolomide With Temsirolimus or Dinutuximab in Treating Younger Patients With Refractory or Relapsed Neuroblastoma	ATC Class - L03A - Interferon,ATC Class - L01X - Other antineoplastic agents in atc,ATC Class - L01A - Alkylating agents,ATC Class - J07B - Viral vaccines	Ganglioneuroblastoma, Recurrent Neuroblastoma		null	2013-02-01	Dinutuximab, Irinotecan Hydrochloride, Laboratory Biomarker Analysis, Sargramostim, Temozolomide, Temsirolimus	temozolomide, m&b-39831, ccrg-81045, m&b 39831, m-39831, nsc-362856, sch 52365, sch-52365, temodal, temomedac, temodar, irinotecan, camptosar, irinotecan hydrochloride, campto, cpt-11, dq-2805, irinotecan hydrochloride anhydrous, irinotecan hydrochloride hydrate, irinotecan hydrochloride trihydrate, irinotecan monohydrochloride trihydrate, onivyde, u-101,440e, u-101440e, temsirolimus, cci-779, to…	1	NCT01767194	Phase 2	Phase 2	Compound id 27258 - TEMOZOLOMIDE,Compound id 881410 - IRINOTECAN,Compound id 926244 - IRINOTECAN HYDROCHLORIDE,Compound id 1039526 - TEMSIROLIMUS,Compound id 2689175 - SARGRAMOSTIM,Compound id 2764840 - DINUTUXIMAB
A Phase I Study of CCI-779 (Temsirolimus) in Combination With Topotecan in Patients With Gynecologic Malignancies	ATC Class - L01X - Other antineoplastic agents in atc	Genital Neoplasms, Female		2010-12-01	2007-08-01	CCI-779 (temsirolimus), Topotecan	topotecan, hycamtin, nsc-609699, potactasol, skf-104864, temsirolimus, cci-779, torisel	1	NCT00523432	Phase 1	Phase 1	Compound id 321984 - TOPOTECAN,Compound id 1039526 - TEMSIROLIMUS
Temsirolimus and Radiation for Non-Small Cell Lung Cancer	ATC Class - L01X - Other antineoplastic agents in atc	Carcinoma, Non-Small-Cell Lung		2011-07-01	2009-03-01	Radiation therapy, Temsirolimus	temsirolimus, cci-779, torisel	1	NCT00796796	Phase 1	Phase 1	Compound id 1039526 - TEMSIROLIMUS
Study Evaluating Temsirolimus (CCI-779) In Mantle Cell Lymphoma (MCL)	ATC Class - L01X - Other antineoplastic agents in atc	Lymphoma		2011-01-01	2005-05-01	Investigator's choice, Temsirolimus (CCI-779), Temsirolimus (CCI-779)	temsirolimus, cci-779, torisel	1	NCT00117598	Phase 3	Phase 3	Compound id 1039526 - TEMSIROLIMUS
Temsirolimus-RCC-imaging	ATC Class - L01X - Other antineoplastic agents in atc	Renal Cell Cancer		null	2009-08-01	Temsirolimus	temsirolimus, cci-779, torisel	1	NCT01246817	Phase 2	Phase 2	Compound id 1039526 - TEMSIROLIMUS
CCI-779 in Treating Patients With Soft Tissue Sarcoma or Gastrointestinal Stromal Tumor	ATC Class - L01X - Other antineoplastic agents in atc	Gastrointestinal Stromal Tumor, Recurrent Adult Soft Tissue Sarcoma, Stage I Adult Soft Tissue Sarcoma, Stage II Adult Soft Tissue Sarcoma, Stage III Adult Soft Tissue Sarcoma, Stage IV Adult Soft Tissue Sarcoma		null	2004-06-01	laboratory biomarker analysis, temsirolimus	temsirolimus, cci-779, torisel	1	NCT00087074	Phase 2	Phase 2	Compound id 1039526 - TEMSIROLIMUS
Temsirolimus, Dexamethasone, Mitoxantrone Hydrochloride, Vincristine Sulfate, and Pegaspargase in Treating Young Patients With Relapsed Acute Lymphoblastic Leukemia or Non-Hodgkin Lymphoma	ATC Class - R01A - Decongestants and other nasal preparations for topical use,ATC Class - A01A - Stomatological preparations,ATC Class - S01B - Antiinflammatory agents, ophthalmologic,ATC Class - S03B - Corticosteroid ophthalmologic and otologic preparations,ATC Class - D07A - Corticosteroid dermatological preparations, plain,ATC Class - D10A - Anti-acne preparations for topical use,ATC Class - C…	Childhood B Acute Lymphoblastic Leukemia, Childhood T Acute Lymphoblastic Leukemia, Mature T-Cell and NK-Cell Non-Hodgkin Lymphoma, Recurrent Childhood Acute Lymphoblastic Leukemia, Recurrent Childhood Lymphoblastic Lymphoma		null	2011-09-01	Dexamethasone, Laboratory Biomarker Analysis, Methotrexate, Mitoxantrone Hydrochloride, Pegaspargase, Pharmacological Study, Temsirolimus, Vincristine Sulfate	mitoxantrone, novantrone, mitoxantrone hcl, nsc-279836, methotrexate, abitrexate, folex, mexate, mexate-aq, trexall, amethopterin, tcmdc-123832, tcmdc-125488, tcmdc-125858, adx-2191, cl 14377, cl-14377, ebetrex, emt-25299, emtexate high-pot, emtexate pf, maxtrex, methylaminopterin, metoject, nsc-740, otrexup, otrexup pfs, r-9985, r-methotrexate, rasuvo, reditrex, rheumatrex, zlatal, dexamethasone…	1	NCT01403415	Phase 1	Phase 1	Compound id 404639 - MITOXANTRONE,Compound id 490791 - METHOTREXATE,Compound id 1903831 - DEXAMETHASONE,Compound id 582963 - MITOXANTRONE HYDROCHLORIDE,Compound id 986271 - VINCRISTINE,Compound id 998224 - VINCRISTINE SULFATE,Compound id 1039526 - TEMSIROLIMUS,Compound id 2741195 - PEGASPARGASE
Study Evaluating The Safety, Efficacy & Pharmacokinetics Of Temsirolimus(CCI-779) In Subjects With Advanced Renal Cell Carcinoma	ATC Class - L01X - Other antineoplastic agents in atc	Advanced Renal Cell Carcinoma		2012-03-01	2007-02-01	Temsirolimus (CCI-779), Temsirolimus (CCI-779)	temsirolimus, cci-779, torisel	1	NCT00494091	Phase 2	Phase 2	Compound id 1039526 - TEMSIROLIMUS
Combination of Temsirolimus and Bevacizumab in Patient With Metastatic Renal Cell Carcinoma	ATC Class - L03A - Interferon,ATC Class - L01X - Other antineoplastic agents in atc,ATC Class - S01A - Antiinfective ophthalmologics,ATC Class - J07B - Viral vaccines,ATC Class - C07B - Beta blocking agents and thiazides,ATC Class - G03C - Estrogens, sex hormones and modulators of the genital system	Metastatic Renal Cell Carcinoma		2012-02-01	2008-02-01	Bevacizumab, Interferon alpha-2a, Sunitinib, Temsirolimus	sunitinib, sutent, su-011248, su-11248, su011248, temsirolimus, cci-779, torisel, bevacizumab, 12-igg1, ava-1, avastin, bevacizumab beta, bi 695502, bs-503a, chs-5217, ct-16, ct-p16, ct-p16 (biosimilar of bevacizumab), fkb-238, hlx-04, hlx04, ibi305, pf-06439535, r-435, rg-435, rhumab-, rhumab-vegf, usp mab 002, monoclonal igg1, interferon, interferon alfa, interf, interferon alfa natural, interf…	1	NCT00619268	Phase 2	Phase 2	Compound id 154683 - SUNITINIB,Compound id 1039526 - TEMSIROLIMUS,Compound id 2689088 - BEVACIZUMAB,Compound id 2741143 - INTERFERON,Compound id 2741155 - INTERFERON ALFA
Temsirolimus/AZD 6244 for Treatment-naive With BRAF Mutant Unresectable Stage IV	ATC Class - L01X - Other antineoplastic agents in atc	Mucosal Melanoma, Recurrent Melanoma, Stage IV Melanoma		2012-06-01	2010-10-01	laboratory biomarker analysis, selumetinib, temsirolimus	temsirolimus, cci-779, torisel, selumetinib, arry-142886, arry-886, azd-6244, azd6244, koselugo	1	NCT01166126	Phase 2	Phase 2	Compound id 1039526 - TEMSIROLIMUS,Compound id 1897397 - SELUMETINIB
Sirolimus or Everolimus or Temsirolimus and Vorinostat in Advanced Cancer	ATC Class - L01X - Other antineoplastic agents in atc,ATC Class - L04A - Immunosuppressants,ATC Class - S01X - Other ophthalmologicals in atc	Advanced Cancer		2021-05-01	2010-03-01	Everolimus, Sirolimus, Temsirolimus, Vorinostat	sirolimus, ay-22989, l04aa10, nsc-226080, rapamycin, rapamune, sm-88 component sirolimus, wy-090217, everolimus, afinitor, afinitor disperz, certican, rad 666, rad-001, rad-666, rad001, sdz-rad, votubia, zortress, temsirolimus, cci-779, torisel, vorinostat, mk-0683, mk0683, zolinza	1	NCT01087554	Phase 1	Phase 1	Compound id 997103 - SIROLIMUS,Compound id 1012475 - EVEROLIMUS,Compound id 1039526 - TEMSIROLIMUS,Compound id 1113023 - VORINOSTAT
Neuroblastoma Protocol 2008: Therapy for Children With Advanced Stage High Risk Neuroblastoma	ATC Class - D10A - Anti-acne preparations for topical use,ATC Class - L01X - Other antineoplastic agents in atc,ATC Class - L01D - Cytotoxic antibiotics and related substances,ATC Class - L01A - Alkylating agents,ATC Class - L01C - Plant alkaloids and other natural products, antineoplastic drugs,ATC Class - B02B - Vitamin k and other hemostatics,ATC Class - J07B - Viral vaccines	Neuroblastoma		2009-07-01	2008-12-01	13-cis-retinoic acid, Cisplatin, Cyclophosphamide, Doxorubicin, Etoposide, Irinotecan, PBSC, Radiation Therapy, Surgical Resection of Primary Tumor, Temsirolimus, Topotecan	cyclophosphamide, b-518, cyclophosphamide anhydrous, cyclophosphamide hydrate, cyclophosphamide monohydrate, cytoxan (lyophilized), cytoxan, endoxana, lyophilized cytoxan, neosar, nsc-26271, topotecan, hycamtin, nsc-609699, potactasol, skf-104864, doxorubicin, doxil, rubex, adriamycin, hydroxydaunorubicin, adriblastina, epirubicin hydrochloride impurity, doxorubicin-, nsc-123127, valrubicin impur…	1	NCT00808899	Phase 2	Phase 2	Compound id 51794 - CYCLOPHOSPHAMIDE,Compound id 321984 - TOPOTECAN,Compound id 791569 - DOXORUBICIN,Compound id 866156 - ETOPOSIDE,Compound id 881410 - IRINOTECAN,Compound id 1039526 - TEMSIROLIMUS,Compound id 1305739 - TRETINOIN,Compound id 2685970 - CISPLATIN
Sunitinib Plus Temsirolimus in Patients With Renal Cell Cancer (RCC)	ATC Class - L01X - Other antineoplastic agents in atc	Kidney Cancer, Renal Cell Cancer		2014-07-01	2010-05-01	Sunitinib, Temsirolimus	sunitinib, sutent, su-011248, su-11248, su011248, temsirolimus, cci-779, torisel	1	NCT01122615	Phase 1	Phase 1	Compound id 154683 - SUNITINIB,Compound id 1039526 - TEMSIROLIMUS
Gamma-Secretase/Notch Signalling Pathway Inhibitor RO4929097 and Temsirolimus in Treating Patients With Advanced Solid Tumors	ATC Class - L01X - Other antineoplastic agents in atc	Endometrial Papillary Serous Carcinoma, Recurrent Endometrial Carcinoma, Recurrent Renal Cell Cancer, Stage III Endometrial Carcinoma, Stage III Renal Cell Cancer, Stage IV Endometrial Carcinoma, Stage IV Renal Cell Cancer, Unspecified Adult Solid Tumor, Protocol Specific		2013-10-01	2010-08-01	gamma-secretase/Notch signalling pathway inhibitor RO4929097, laboratory biomarker analysis, pharmacological study, temsirolimus	rg-4733, rg 4733, ro 4929097, ro-4929097, ro4929097, temsirolimus, cci-779, torisel	1	NCT01198184	Phase 1	Phase 1	Compound id 555140 - RG-4733,Compound id 1039526 - TEMSIROLIMUS
NCT Neuro Master Match - NÂ²MÂ² (NOA-20)	ATC Class - L01X - Other antineoplastic agents in atc	Glioblastoma, Adult		2024-09-01	2018-05-01	APG101, Alectinib, Atezolizumab, Idasanutlin, Palbociclib, Temsirolimus, Vismodegib	pd0332991, palbociclib, ibrance, pd-0332991, pf-332991, ch5424802, alectinib, af-802, af802, alecensa, ch-5424802, ro-5424802, ro5424802, rg7388, idasanutlin, rg-7388, ro-5503781, ro5503781, temsirolimus, cci-779, torisel, vismodegib, erivedge, gdc-0449, nsc-747691, atezolizumab, anti-pd-l1, anti-pdl1, mpdl-3280a, mpdl3280a, rg-7446, rg7446, tecentriq, asunercept, apg-101, apg101, can-008	1	NCT03158389	Phase 1	Phase 1	Compound id 495280 - PALBOCICLIB,Compound id 696603 - ALECTINIB,Compound id 872228 - IDASANUTLIN,Compound id 1039526 - TEMSIROLIMUS,Compound id 1811695 - VISMODEGIB,Compound id 2785457 - ATEZOLIZUMAB,Compound id 2817709 - ASUNERCEPT
Temsirolimus and Cixutumumab in Treating Patients With Locally Advanced, Metastatic, or Recurrent Soft Tissue Sarcoma or Bone Sarcoma	ATC Class - L01X - Other antineoplastic agents in atc	Metastatic Osteosarcoma, Recurrent Adult Soft Tissue Sarcoma, Recurrent Osteosarcoma, Stage III Adult Soft Tissue Sarcoma, Stage IV Adult Soft Tissue Sarcoma		2014-07-01	2009-11-01	Cixutumumab, Laboratory Biomarker Analysis, Temsirolimus	temsirolimus, cci-779, torisel, cixutumumab, imc-a12, nsc-742460	1	NCT01016015	Phase 2	Phase 2	Compound id 1039526 - TEMSIROLIMUS,Compound id 2728603 - CIXUTUMUMAB
Combination CCI-779 (Temsirolimus) and Bortezomib (Velcade) in Relapsed and/or Relapsed/Refractory Multiple Myeloma	ATC Class - L01X - Other antineoplastic agents in atc	Multiple Myeloma		2012-02-01	2007-05-01	Bortezomib, CCI-779	temsirolimus, cci-779, torisel, bortezomib, velcade, bortezomib hydrate, ldp-341, nsc-681239, ps-341	1	NCT00483262	Phase 1	Phase 1	Compound id 1039526 - TEMSIROLIMUS,Compound id 1901573 - BORTEZOMIB
Lenalidomide in Combination With Bevacizumab, Sorafenib, Temsirolimus, or 5-Fluorouracil, Leucovorin, Oxaliplatin (FOLFOX)	ATC Class - L01X - Other antineoplastic agents in atc,ATC Class - L01B - Antimetabolites,ATC Class - L04A - Immunosuppressants,ATC Class - J07B - Viral vaccines	Advanced Cancers		2016-05-01	2010-08-01	5-fluorouracil, Bevacizumab, Lenalidomide, Lenalidomide, Leucovorin, Oxaliplatin, Sorafenib, Temsirolimus	fluorouracil, 5-fu, 5-fluorouracil, 5 fu, 5.f.u., accusite, actikerall, adrucil, carac, efudix, efudex, fluoro-uracil roche, fluracil, fluoroplex, nsc-19893, ro 2-9757, ro-2-9757, ro-29757, tolak, sorafenib, bay 43-9006, bay-43-9006, nexavar, leucovorin, temsirolimus, cci-779, torisel, lenalidomide, cc-5013, cdc-501, revlimid, syp-1512, bevacizumab, 12-igg1, ava-1, avastin, bevacizumab beta, bi 6…	1	NCT01183663	Phase 1	Phase 1	Compound id 23643 - FLUOROURACIL,Compound id 429624 - SORAFENIB,Compound id 570936 - LEUCOVORIN,Compound id 1039526 - TEMSIROLIMUS,Compound id 1113909 - LENALIDOMIDE,Compound id 2689088 - BEVACIZUMAB,Compound id 2805075 - OXALIPLATIN
A Study of Combination of Temsirolimus (ToriselÂ®) and Pegylated Liposomal Doxorubicin (PLD, DoxilÂ®/CaelyxÂ®) in Advanced or Recurrent Breast, Endometrial and Ovarian Cancer	ATC Class - L01X - Other antineoplastic agents in atc	Advanced/Recurrent Breast Cancer, Endometrial Cancer, Ovarian Cancer		2012-08-01	2009-06-01	Temsirolimus/PLD	temsirolimus, cci-779, torisel	1	NCT00982631	Phase 1	Phase 1	Compound id 1039526 - TEMSIROLIMUS
CCI-779 in Treating Patients With Malignant Glioma	ATC Class - L01X - Other antineoplastic agents in atc	Brain and Central Nervous System Tumors		2007-12-01	2001-08-01	temsirolimus	temsirolimus, cci-779, torisel	1	NCT00022724	Phase 1	Phase 1	Compound id 1039526 - TEMSIROLIMUS
Single Agent Temsirolimus (ToriselÂ®) in Chemotherapy-naÃ¯ve Castration-Resistant Prostate Cancer Patients	ATC Class - L01X - Other antineoplastic agents in atc	Prostate Cancer		2013-10-01	2009-06-01	torisel	temsirolimus, cci-779, torisel	1	NCT00919035	Phase 2	Phase 2	Compound id 1039526 - TEMSIROLIMUS
A Study Combining Treatment With Temsirolimus and Sunitinib for Subjects With Advanced Renal Cell Carcinoma	ATC Class - L01X - Other antineoplastic agents in atc	Renal Cell Carcinoma		2007-05-01	2007-03-01	Combination of Temsirolimus and Sunitinib	sunitinib, sutent, su-011248, su-11248, su011248, temsirolimus, cci-779, torisel	1	NCT00417677	Phase 1	Phase 1	Compound id 154683 - SUNITINIB,Compound id 1039526 - TEMSIROLIMUS
Bevacizumab and Temsirolimus in Treating Patients With Recurrent or Persistent Endometrial Cancer	ATC Class - L01X - Other antineoplastic agents in atc,ATC Class - J07B - Viral vaccines	Recurrent Endometrial Carcinoma		2016-01-01	2008-09-01	bevacizumab, temsirolimus	temsirolimus, cci-779, torisel, bevacizumab, 12-igg1, ava-1, avastin, bevacizumab beta, bi 695502, bs-503a, chs-5217, ct-16, ct-p16, ct-p16 (biosimilar of bevacizumab), fkb-238, hlx-04, hlx04, ibi305, pf-06439535, r-435, rg-435, rhumab-, rhumab-vegf, usp mab 002, monoclonal igg1	1	NCT00723255	Phase 2	Phase 2	Compound id 1039526 - TEMSIROLIMUS,Compound id 2689088 - BEVACIZUMAB
Vemurafenib in Combination With Everolimus or Temsirolimus With Advanced Cancer	ATC Class - L01X - Other antineoplastic agents in atc,ATC Class - L04A - Immunosuppressants	Advanced Cancer, Solid Tumor		2020-06-01	2012-12-01	Everolimus, Temsirolimus, Vemurafenib	vemurafenib, plx-4032, plx4032, rg 7204, rg-7204, ro 5185426, ro-51-85426, ro-5185426, zelboraf, everolimus, afinitor, afinitor disperz, certican, rad 666, rad-001, rad-666, rad001, sdz-rad, votubia, zortress, temsirolimus, cci-779, torisel	1	NCT01596140	Phase 1	Phase 1	Compound id 505877 - VEMURAFENIB,Compound id 1012475 - EVEROLIMUS,Compound id 1039526 - TEMSIROLIMUS
Personalized Targeted Inhibitors Treatment in Renal Cell Cancer	ATC Class - L01X - Other antineoplastic agents in atc,ATC Class - L04A - Immunosuppressants	Carcinoma, Renal Cell		2017-07-01	2016-01-01	Axitinib, Everolimus, Pazopanib, Sorafenib, Sunitinib, Temsirolimus	sunitinib, sutent, su-011248, su-11248, su011248, pazopanib, gw786034, votrient, sorafenib, bay 43-9006, bay-43-9006, nexavar, everolimus, afinitor, afinitor disperz, certican, rad 666, rad-001, rad-666, rad001, sdz-rad, votubia, zortress, temsirolimus, cci-779, torisel, axitinib, ag-013736, ag-13736, inlyta	1	NCT02560012	Phase 2	Phase 2	Compound id 154683 - SUNITINIB,Compound id 340003 - PAZOPANIB,Compound id 429624 - SORAFENIB,Compound id 1012475 - EVEROLIMUS,Compound id 1039526 - TEMSIROLIMUS,Compound id 1927385 - AXITINIB
Comparison Of 2 Doses Of Temsirolimus (Torisel) In Patients With Mantle Cell Lymphoma	ATC Class - L01X - Other antineoplastic agents in atc	Non-Hodgkin's Lymphoma		2018-06-01	2011-03-01	temsirolimus, temsirolimus	temsirolimus, cci-779, torisel	1	NCT01180049	Phase 4	Phase 4	Compound id 1039526 - TEMSIROLIMUS
Temsirolimus and Bevacizumab in Hormone-Resistant Metastatic Prostate Cancer That Did Not Respond to Chemotherapy	ATC Class - L01X - Other antineoplastic agents in atc,ATC Class - J07B - Viral vaccines	Prostate Cancer		2014-10-01	2009-01-01	bevacizumab, laboratory biomarker analysis, polymorphism analysis, temsirolimus	temsirolimus, cci-779, torisel, bevacizumab, 12-igg1, ava-1, avastin, bevacizumab beta, bi 695502, bs-503a, chs-5217, ct-16, ct-p16, ct-p16 (biosimilar of bevacizumab), fkb-238, hlx-04, hlx04, ibi305, pf-06439535, r-435, rg-435, rhumab-, rhumab-vegf, usp mab 002, monoclonal igg1	1	NCT01083368	Phase 1	Phase 1	Compound id 1039526 - TEMSIROLIMUS,Compound id 2689088 - BEVACIZUMAB
Dasatinib, Temsirolimus, and Cyclophosphamide in Treating Patients With Advanced, Recurrent, or Refractory Solid Tumors	ATC Class - L01X - Other antineoplastic agents in atc,ATC Class - L01A - Alkylating agents	Advanced Malignant Solid Neoplasm, Recurrent Brain Neoplasm, Recurrent Malignant Solid Neoplasm, Refractory Brain Neoplasm		2021-10-01	2015-10-01	Cyclophosphamide, Dasatinib, Laboratory Biomarker Analysis, Temsirolimus	cyclophosphamide, b-518, cyclophosphamide anhydrous, cyclophosphamide hydrate, cyclophosphamide monohydrate, cytoxan (lyophilized), cytoxan, endoxana, lyophilized cytoxan, neosar, nsc-26271, dasatinib, bms-354825, bms-354825 hydrate, bms-354825-03, dasatinib hydrate, dasatinib monohydrate, sprycel, temsirolimus, cci-779, torisel	1	NCT02389309	Phase 1	Phase 1	Compound id 51794 - CYCLOPHOSPHAMIDE,Compound id 501089 - DASATINIB,Compound id 1039526 - TEMSIROLIMUS
Phase I Trial of Bevacizumab and Temsirolimus in Combination With 1) Carboplatin, 2) Paclitaxel, 3) Sorafenib for the Treatment of Advanced Cancer	ATC Class - L01X - Other antineoplastic agents in atc,ATC Class - L01C - Plant alkaloids and other natural products, antineoplastic drugs,ATC Class - J07B - Viral vaccines	Advanced Cancer		2021-12-01	2010-08-01	Bevacizumab, Carboplatin, Paclitaxel, Sorafenib, Temsirolimus	sorafenib, bay 43-9006, bay-43-9006, nexavar, paclitaxel, abi-007, abi-007 component paclitaxel, abraxane, bms 181339-01, bms-181339-01, dhp 107, dhp-107, mbt 0206, mbt-0206, nk 105, nk-105, nsc-125973, pacitaxel, paxene, qw-8184, taxol, taxol 100, temsirolimus, cci-779, torisel, bevacizumab, 12-igg1, ava-1, avastin, bevacizumab beta, bi 695502, bs-503a, chs-5217, ct-16, ct-p16, ct-p16 (biosimila…	1	NCT01187199	Phase 1	Phase 1	Compound id 429624 - SORAFENIB,Compound id 991478 - PACLITAXEL,Compound id 1039526 - TEMSIROLIMUS,Compound id 2689088 - BEVACIZUMAB,Compound id 2702494 - CARBOPLATIN
TAPUR: Testing the Use of Food and Drug Administration (FDA) Approved Drugs That Target a Specific Abnormality in a Tumor Gene in People With Advanced Stage Cancer	ATC Class - L01X - Other antineoplastic agents in atc	Advanced Solid Tumors, Lymphoma, Non-Hodgkin, Multiple Myeloma		2024-12-01	2016-03-01	Abemaciclib, Afatinib, Atezolizumab and PHESGO, Atezolizumab and Talazoparib, Crizotinib, Entrectinib, Larotrectinib, Nivolumab and Ipilimumab, Olaparib, Palbociclib, Pembrolizumab, Regorafenib, Sunitinib, Talazoparib, Temsirolimus, Trastuzumab and Pertuzumab, Tucatinib plus Trastuzumab Subcutaneous (SC), Vemurafenib and Cobimetinib	talazoparib, bmn 673, bmn-673, lt-673, talzenna, sunitinib, sutent, su-011248, su-11248, su011248, crizotinib, pf-2341066, pf-02341066, xalkori, cobimetinib, cotellic, gdc-0623, gdc-0973, rg 7420, rg-7420, rg-7421, rg7420, xl-518, larotrectinib, arry-470, bay-2757556, bay2757556, loxo-101, vitrakvi, olaparib, az-2281, az2281, azd-2281, azd2281, keylynk-010 component olaparib, ku-0059436, ku-59436…	1	NCT02693535	Phase 2	Phase 2	Compound id 115543 - TALAZOPARIB,Compound id 154683 - SUNITINIB,Compound id 259783 - CRIZOTINIB,Compound id 295586 - COBIMETINIB,Compound id 401319 - LAROTRECTINIB,Compound id 422599 - OLAPARIB,Compound id 495280 - PALBOCICLIB,Compound id 505877 - VEMURAFENIB,Compound id 519928 - REGORAFENIB,Compound id 576596 - AFATINIB,Compound id 676937 - TUCATINIB,Compound id 718414 - ABEMACICLIB,Compound id …
Escalating Doses of Torisel in Combination With Three Chemotherapies Regimens: R-CHOP, R-FC or R-DHA for Patients With Relapsed/Refractory Mantle Cell Lymphoma (MCL).	ATC Class - L01X - Other antineoplastic agents in atc	Mantle Cell Lymphoma Refractory		2015-09-01	2011-11-01	Torisel 75 mg and R-DHA, Torisel dose 15 mg and R-CHOP, Torisel dose 15 mg and R-DHA, Torisel dose 15 mg and R-FC, Torisel dose 25 mg and R-CHOP, Torisel dose 25 mg and R-DHA, Torisel dose 25 mg and R-FC, Torisel dose 50 mg and R-CHOP, Torisel dose 50 mg and R-DHA, Torisel dose 50 mg and R-FC, Torisel dose 75 mg and R-CHOP, Torisel dose 75 mg and R-FC	temsirolimus, cci-779, torisel	1	NCT01389427	Phase 1	Phase 1	Compound id 1039526 - TEMSIROLIMUS
CCI-779 in Treating Patients With Recurrent or Refractory B-Cell Non-Hodgkin's Lymphoma or Chronic Lymphocytic Leukemia	ATC Class - L01X - Other antineoplastic agents in atc	B-cell Chronic Lymphocytic Leukemia, Extranodal Marginal Zone B-cell Lymphoma of Mucosa-associated Lymphoid Tissue, Malignant Neoplasm, Nodal Marginal Zone B-cell Lymphoma, Recurrent Adult Burkitt Lymphoma, Recurrent Adult Diffuse Large Cell Lymphoma, Recurrent Adult Diffuse Mixed Cell Lymphoma, Recurrent Adult Diffuse Small Cleaved Cell Lymphoma, Recurrent Adult Immunoblastic Large Cell Lymphoma…		2010-04-01	2004-03-01	temsirolimus	temsirolimus, cci-779, torisel	1	NCT00290472	Phase 2	Phase 2	Compound id 1039526 - TEMSIROLIMUS
Efficacy,Tolerability,Safety of Temsirolimus in Women With Platinum-refractory Ovarian Carcinoma or Advanced Endometrial Carcinoma	ATC Class - L01X - Other antineoplastic agents in atc	Endometrial Neoplasms, Genital Diseases, Female, Ovarian Diseases, Ovarian Neoplasms		2015-11-01	2011-10-01	Temsirolimus	temsirolimus, cci-779, torisel	1	NCT01460979	Phase 2	Phase 2	Compound id 1039526 - TEMSIROLIMUS
Sorafenib Tosylate and Temsirolimus in Treating Patients With Recurrent Glioblastoma	ATC Class - L01X - Other antineoplastic agents in atc	Adult Glioblastoma, Adult Gliosarcoma, Recurrent Adult Brain Neoplasm		2013-02-01	2006-03-01	Conventional Surgery, Laboratory Biomarker Analysis, Sorafenib Tosylate, Temsirolimus	sorafenib, bay 43-9006, bay-43-9006, nexavar, sorafenib tosylate, bay 54-9085, bay-54-9085, sorafenib tosilate, temsirolimus, cci-779, torisel	1	NCT00329719	Phase 1	Phase 1	Compound id 429624 - SORAFENIB,Compound id 885050 - SORAFENIB TOSYLATE,Compound id 1039526 - TEMSIROLIMUS
Temsirolimus in Myelodysplastic Syndrome (MDS)	ATC Class - L01X - Other antineoplastic agents in atc	Myelodysplastic Syndrome		2014-06-01	2010-04-01	Temsirolimus	temsirolimus, cci-779, torisel	1	NCT01111448	Phase 2	Phase 2	Compound id 1039526 - TEMSIROLIMUS
Vinblastine and Temsirolimus in Pediatrics With Recurrent or Refractory Lymphoma or Solid Tumours Including CNS Tumours	ATC Class - L01C - Plant alkaloids and other natural products, antineoplastic drugs,ATC Class - L01X - Other antineoplastic agents in atc	Central Nervous System, Recurrent Lymphoma, Refractory Lymphoma, Solid Tumours		2019-01-01	2015-06-01	Temsirolimus, Vinblastine	vinblastine, velban, [3h]-vinblastine, nsc-47842, temsirolimus, cci-779, torisel	1	NCT02343718	Phase 1	Phase 1	Compound id 982758 - VINBLASTINE,Compound id 1039526 - TEMSIROLIMUS
Study Evaluating CCI-779 in Active Rheumatoid Arthritis on Concomitant Methotrexate Therapy	ATC Class - L01X - Other antineoplastic agents in atc	Rheumatoid Arthritis		2005-08-01	2003-12-01	CCI-779, Placebo	temsirolimus, cci-779, torisel	1	NCT00076206	Phase 2	Phase 2	Compound id 1039526 - TEMSIROLIMUS
Temsirolimus Alone or Paired With Dexamethasone Delivered to the Adventitia to eNhance Clinical Efficacy After Femoropopliteal Revascularization	ATC Class - R01A - Decongestants and other nasal preparations for topical use,ATC Class - A01A - Stomatological preparations,ATC Class - S01B - Antiinflammatory agents, ophthalmologic,ATC Class - S03B - Corticosteroid ophthalmologic and otologic preparations,ATC Class - D07A - Corticosteroid dermatological preparations, plain,ATC Class - D10A - Anti-acne preparations for topical use,ATC Class - C…	Peripheral Arterial Disease		2024-08-01	2019-10-01	Temsirolimus, Temsirolimus and dexamethasone sodium phosphate	sodium phosphate, e-339(ii), fema no. 2398, ins no.339(ii), ins-339(ii), neutral sod phos, sodium phosphate dibasic, sodium phosphate, dibasic anhydrous, sodium phosphate, dibasic, anhydrous, dexamethasone sodium phosphate, dexamethasone, dexacen-4, dexacort, dexair, dexamethasone 21-phosphate disodium salt, dexamethasone sodium phosphate preservative free, decadron, hexadrol, maxidex, tlc-399, t…	1	NCT03942601	Phase 2	Phase 2	Compound id 1358 - SODIUM PHOSPHATE,Compound id 593684 - DEXAMETHASONE SODIUM PHOSPHATE,Compound id 1903831 - DEXAMETHASONE,Compound id 1039526 - TEMSIROLIMUS
Sorafenib and Temsirolimus in Treating Patients With Metastatic, Recurrent, or Unresectable Melanoma	ATC Class - L01X - Other antineoplastic agents in atc	Melanoma, Recurrent Melanoma, Stage III Melanoma, Stage IV Melanoma		2012-02-01	2006-04-01	sorafenib tosylate, temsirolimus	sorafenib, bay 43-9006, bay-43-9006, nexavar, sorafenib tosylate, bay 54-9085, bay-54-9085, sorafenib tosilate, temsirolimus, cci-779, torisel	1	NCT00349206	Phase 1	Phase 1	Compound id 429624 - SORAFENIB,Compound id 885050 - SORAFENIB TOSYLATE,Compound id 1039526 - TEMSIROLIMUS
Vinorelbine Tartrate and Cyclophosphamide in Combination With Bevacizumab or Temsirolimus in Treating Patients With Recurrent or Refractory Rhabdomyosarcoma	ATC Class - L01A - Alkylating agents,ATC Class - L01X - Other antineoplastic agents in atc,ATC Class - L01C - Plant alkaloids and other natural products, antineoplastic drugs,ATC Class - J07B - Viral vaccines	Adult Rhabdomyosarcoma, Childhood Alveolar Rhabdomyosarcoma, Childhood Pleomorphic Rhabdomyosarcoma, Childhood Rhabdomyosarcoma With Mixed Embryonal and Alveolar Features, Previously Treated Childhood Rhabdomyosarcoma, Recurrent Adult Soft Tissue Sarcoma, Recurrent Childhood Rhabdomyosarcoma		2015-06-01	2010-10-01	Bevacizumab, Cyclophosphamide, Laboratory Biomarker Analysis, Temsirolimus, Vinorelbine Tartrate	cyclophosphamide, b-518, cyclophosphamide anhydrous, cyclophosphamide hydrate, cyclophosphamide monohydrate, cytoxan (lyophilized), cytoxan, endoxana, lyophilized cytoxan, neosar, nsc-26271, tartrate, e 334, e-334, fema no. 3044, ins no.334, ins-334, l-tartaric acid, nsc-62778, tartaric acid, vinorelbine, vinorelbine base, vinorelbine tartrate, vinorelbine ditartarate, navelbine, tlc-178, tlc178,…	1	NCT01222715	Phase 2	Phase 2	Compound id 51794 - CYCLOPHOSPHAMIDE,Compound id 67113 - TARTRATE,Compound id 977032 - VINORELBINE,Compound id 1003857 - VINORELBINE TARTRATE,Compound id 1039526 - TEMSIROLIMUS,Compound id 2689088 - BEVACIZUMAB
A Phase I, Open-Label, Multi-center Study to Assess the Safety, Tolerability and Pharmacokinetics of AZD6244 (ARRY-142886)	ATC Class - L01A - Alkylating agents,ATC Class - L01X - Other antineoplastic agents in atc,ATC Class - L01C - Plant alkaloids and other natural products, antineoplastic drugs	Breast Cancer, Breast Neoplasms, Colon Cancer, Colon Neoplasms, Colonic Cancer, Kidney Cancer, Lung Cancer, Melanoma		2021-12-01	2007-12-01	AZD6244, Dacarbazine, Docetaxel, Erlotinib, Temsirolimus	dacarbazine, dtic, dtic-dome, nci c04717, nsc-45388, erlotinib, osi-774, ro-508231, cp-358,774, cp-358774, cp-35877401, r-1415, rg-1415, tarceva, docetaxel, bind 014, ckd-810, docefrez, docetaxel anhydrous, docetaxel hydrate, docetaxel trihydrate, nsc-628503, rp 56976, rp-56976, taxceus, taxotere, xrp6976, temsirolimus, cci-779, torisel, selumetinib, arry-142886, arry-886, azd-6244, azd6244, kose…	1	NCT00600496	Phase 1	Phase 1	Compound id 15245 - DACARBAZINE,Compound id 141944 - ERLOTINIB,Compound id 990319 - DOCETAXEL,Compound id 1039526 - TEMSIROLIMUS,Compound id 1897397 - SELUMETINIB
Sorafenib and Temsirolimus in Treating Patients With Unresectable or Metastatic Solid Tumors	ATC Class - L01X - Other antineoplastic agents in atc	Unspecified Adult Solid Tumor, Protocol Specific		2007-04-01	2005-09-01	laboratory biomarker analysis, sorafenib tosylate, temsirolimus	sorafenib, bay 43-9006, bay-43-9006, nexavar, sorafenib tosylate, bay 54-9085, bay-54-9085, sorafenib tosilate, temsirolimus, cci-779, torisel	1	NCT00255658	Phase 1	Phase 1	Compound id 429624 - SORAFENIB,Compound id 885050 - SORAFENIB TOSYLATE,Compound id 1039526 - TEMSIROLIMUS
Hepatocellular Carcinoma (HCC)_Torisel_	ATC Class - L01X - Other antineoplastic agents in atc	Inoperable HCC		2016-01-01	2009-10-01	Torisel	temsirolimus, cci-779, torisel	1	NCT01251458	Phase 1	Phase 1	Compound id 1039526 - TEMSIROLIMUS
Temsirolimus in Treating Patients With Relapsed or Refractory Multiple Myeloma	ATC Class - L01X - Other antineoplastic agents in atc	Refractory Multiple Myeloma, Stage I Multiple Myeloma, Stage II Multiple Myeloma, Stage III Multiple Myeloma		null	2004-02-01	laboratory biomarker analysis, pharmacological study, temsirolimus	temsirolimus, cci-779, torisel	1	NCT00079456	Phase 2	Phase 2	Compound id 1039526 - TEMSIROLIMUS
Combination Chemotherapy With or Without Temsirolimus in Treating Patients With Intermediate Risk Rhabdomyosarcoma	ATC Class - L01C - Plant alkaloids and other natural products, antineoplastic drugs,ATC Class - L01A - Alkylating agents,ATC Class - L01D - Cytotoxic antibiotics and related substances,ATC Class - L01X - Other antineoplastic agents in atc,ATC Class - J07B - Viral vaccines	Alveolar Rhabdomyosarcoma, Botryoid-Type Embryonal Rhabdomyosarcoma, Embryonal Rhabdomyosarcoma, Rhabdomyosarcoma, Sclerosing Rhabdomyosarcoma, Spindle Cell Rhabdomyosarcoma		2024-12-01	2016-05-01	Cyclophosphamide, Dactinomycin, Irinotecan Hydrochloride, Laboratory Biomarker Analysis, Questionnaire Administration, Radiation Therapy, Temsirolimus, Vincristine Sulfate, Vinorelbine	cyclophosphamide, b-518, cyclophosphamide anhydrous, cyclophosphamide hydrate, cyclophosphamide monohydrate, cytoxan (lyophilized), cytoxan, endoxana, lyophilized cytoxan, neosar, nsc-26271, irinotecan, camptosar, irinotecan hydrochloride, campto, cpt-11, dq-2805, irinotecan hydrochloride anhydrous, irinotecan hydrochloride hydrate, irinotecan hydrochloride trihydrate, irinotecan monohydrochlorid…	1	NCT02567435	Phase 3	Phase 3	Compound id 51794 - CYCLOPHOSPHAMIDE,Compound id 881410 - IRINOTECAN,Compound id 926244 - IRINOTECAN HYDROCHLORIDE,Compound id 977032 - VINORELBINE,Compound id 986271 - VINCRISTINE,Compound id 998224 - VINCRISTINE SULFATE,Compound id 1011709 - DACTINOMYCIN,Compound id 1039526 - TEMSIROLIMUS
CCI-779 in Treating Patients With Metastatic Melanoma	ATC Class - L01X - Other antineoplastic agents in atc	Melanoma (Skin)		2005-09-01	2001-06-01	temsirolimus	temsirolimus, cci-779, torisel	1	NCT00022464	Phase 2	Phase 2	Compound id 1039526 - TEMSIROLIMUS
STORM: Temsirolimus, Rituximab and DHAP for Relapsed and Refractory Diffuse Large B-cell Lymphoma	ATC Class - L01X - Other antineoplastic agents in atc	Diffuse Large B-Cell Lymphoma		2018-07-01	2012-09-01	Rituximab, Temsirolimus, DHAP, intravenous	temsirolimus, cci-779, torisel, rituximab, abp-798, abp798, ct-p10, hs-006, hs-006 (rituximab biosimilar), hs006, idec-102, idec-c2b8, mabthera, mabthera rituxan, r-105 idec-102, rg-105, rhcacd20ma, rituximab (genetical recombination), rituxan, sait-101, sait101, usp mab 001, monoclonal igg1, truxima, rituximab-abbs	1	NCT01653067	Phase 2	Phase 2	Compound id 1039526 - TEMSIROLIMUS,Compound id 2689081 - RITUXIMAB
Phase I and Consecutive Phase II, Two-arm, Randomized Multi-center Trial in Patients With Advanced Melanoma	ATC Class - M01A - Antiinflammatory and antirheumatic products, non-steroids,ATC Class - L01A - Alkylating agents,ATC Class - L01X - Other antineoplastic agents in atc,ATC Class - A10B - Blood glucose lowering drugs, excl. insulins	Advanced Melanoma		2016-05-01	2012-05-01	dacarbazine (DTIC), Trofosfamide, Etoricoxib, Pioglitazone, Temsirolimus	dacarbazine, dtic, dtic-dome, nci c04717, nsc-45388, temsirolimus, cci-779, torisel, trofosfamide, a-4828, nsc-109723, trophosphamide, z-4828, etoricoxib, arcoxia, l-791456, mk-0663, pioglitazone, actos, duetact, ad-4833, u-72107	1	NCT01614301	Phase 1	Phase 1	Compound id 15245 - DACARBAZINE,Compound id 1039526 - TEMSIROLIMUS,Compound id 1065047 - TROFOSFAMIDE,Compound id 1501174 - ETORICOXIB,Compound id 1616883 - PIOGLITAZONE
Temsirolimus and Brentuximab Vedotin in Treating Patients With Relapsed or Refractory Hodgkin Lymphoma	ATC Class - L01X - Other antineoplastic agents in atc,ATC Class - J07A - Bacterial vaccines	Recurrent Adult Hodgkin Lymphoma		null	2013-09-01	Brentuximab Vedotin, Laboratory Biomarker Analysis, Temsirolimus	temsirolimus, cci-779, torisel, brentuximab vedotin, adcetris, cac10-vcmmae, sgn-35, vedotin, mmae, monomethyl auristatin e, pab-mmae, conjugated form of mc-vc-pab-mmae	1	NCT01902160	Phase 1	Phase 1	Compound id 1039526 - TEMSIROLIMUS,Compound id 2728596 - BRENTUXIMAB VEDOTIN,Compound id 3218898 - VEDOTIN
A Study of Temsirolimus and Bevacizumab in Recurrent Glioblastoma Multiforme	ATC Class - L01X - Other antineoplastic agents in atc,ATC Class - J07B - Viral vaccines	Glioblastoma Multiforme		2010-02-01	2008-11-01	Bevacizumab, Temsirolimus	temsirolimus, cci-779, torisel, bevacizumab, 12-igg1, ava-1, avastin, bevacizumab beta, bi 695502, bs-503a, chs-5217, ct-16, ct-p16, ct-p16 (biosimilar of bevacizumab), fkb-238, hlx-04, hlx04, ibi305, pf-06439535, r-435, rg-435, rhumab-, rhumab-vegf, usp mab 002, monoclonal igg1	1	NCT00800917	Phase 2	Phase 2	Compound id 1039526 - TEMSIROLIMUS,Compound id 2689088 - BEVACIZUMAB
Temsirolimus and Pazopanib in Patients With Advanced Solid Tumors	ATC Class - L01X - Other antineoplastic agents in atc	Solid Tumors		2012-02-01	2010-02-01	Temsirolimus, Pazopanib	pazopanib, gw786034, votrient, temsirolimus, cci-779, torisel	1	NCT01072890	Phase 1	Phase 1	Compound id 340003 - PAZOPANIB,Compound id 1039526 - TEMSIROLIMUS
Lenalidomide and Temsirolimus in Treating Patients With Relapsed or Refractory Hodgkin Lymphoma or Non-Hodgkin Lymphoma	ATC Class - L01X - Other antineoplastic agents in atc,ATC Class - L04A - Immunosuppressants	AIDS-Related Hodgkin Lymphoma, Recurrent Adult Hodgkin Lymphoma, Recurrent Follicular Lymphoma, Recurrent Lymphoplasmacytic Lymphoma, Recurrent Marginal Zone Lymphoma, Recurrent Non-Hodgkin Lymphoma, Recurrent T-Cell Non-Hodgkin Lymphoma, Waldenstrom Macroglobulinemia		2018-09-01	2010-04-01	Laboratory Biomarker Analysis, Lenalidomide, Temsirolimus	temsirolimus, cci-779, torisel, lenalidomide, cc-5013, cdc-501, revlimid, syp-1512	1	NCT01076543	Phase 1	Phase 1	Compound id 1039526 - TEMSIROLIMUS,Compound id 1113909 - LENALIDOMIDE
CESAR Study in Prostate Cancer With Temsirolimus Added to Standard Docetaxel Therapy (CEPTAS)	ATC Class - L01X - Other antineoplastic agents in atc,ATC Class - L01C - Plant alkaloids and other natural products, antineoplastic drugs	Prostatic Neoplasms		2015-10-01	2010-07-01	Docetaxel, Temsirolimus	docetaxel, bind 014, ckd-810, docefrez, docetaxel anhydrous, docetaxel hydrate, docetaxel trihydrate, nsc-628503, rp 56976, rp-56976, taxceus, taxotere, xrp6976, temsirolimus, cci-779, torisel	1	NCT01206036	Phase 1	Phase 1	Compound id 990319 - DOCETAXEL,Compound id 1039526 - TEMSIROLIMUS
Temsirolimus and Pemetrexed for Recurrent or Refractory Non-Small Cell Lung Cancer	ATC Class - L01X - Other antineoplastic agents in atc,ATC Class - L01B - Antimetabolites	Carcinoma, Non-Small-Cell Lung		2016-04-01	2009-09-01	Pemetrexed, Temsirolimus	temsirolimus, cci-779, torisel, pemetrexed, ly-2315, alimta, ly-231514, ly231514, nsc-698037, pemfexy	1	NCT00921310	Phase 1	Phase 1	Compound id 1039526 - TEMSIROLIMUS,Compound id 2061907 - PEMETREXED
Temsirolimus and Valproic Acid in Treating Young Patients With Relapsed Neuroblastoma, Bone Sarcoma, or Soft Tissue Sarcoma	ATC Class - N03A - Antiepileptics,ATC Class - L01X - Other antineoplastic agents in atc	Brain and Central Nervous System Tumors, Neuroblastoma, Sarcoma, Unspecified Childhood Solid Tumor, Protocol Specific		2013-03-01	2009-11-01	Temsirolimus, Valproic Acid	valproic acid, 44089, convulex, depakote, depakene, nsc-93819, stavzor, valproic, temsirolimus, cci-779, torisel	1	NCT01204450	Phase 1	Phase 1	Compound id 45378 - VALPROIC ACID,Compound id 1039526 - TEMSIROLIMUS
CCI-779 in Treating Patients With Advanced Solid Tumors	ATC Class - L01X - Other antineoplastic agents in atc	Brain and Central Nervous System Tumors, Metastatic Cancer, Unspecified Adult Solid Tumor, Protocol Specific		2002-06-01	2001-01-01	temsirolimus	temsirolimus, cci-779, torisel	1	NCT00003712	Phase 1	Phase 1	Compound id 1039526 - TEMSIROLIMUS
Study of Pegylated Liposomal Doxorubicin and Temsirolimus in Patients With Advanced Hepatocellular Cancer	ATC Class - L01D - Cytotoxic antibiotics and related substances,ATC Class - L01X - Other antineoplastic agents in atc	Liver Neoplasms		2014-05-01	2011-06-01	Temsirolimus 25mg and Pegylated liposomal doxorubicin 25mg/m2	doxorubicin, doxil, rubex, adriamycin, hydroxydaunorubicin, adriblastina, epirubicin hydrochloride impurity, doxorubicin-, nsc-123127, valrubicin impurity, doxorubicin, temsirolimus, cci-779, torisel	1	NCT01281943	Phase 2	Phase 2	Compound id 791569 - DOXORUBICIN,Compound id 1039526 - TEMSIROLIMUS
Radiation Therapy and Temsirolimus or Temozolomide in Treating Patients With Newly Diagnosed Glioblastoma	ATC Class - L01X - Other antineoplastic agents in atc,ATC Class - L01A - Alkylating agents	Brain and Central Nervous System Tumors		2014-03-01	2009-10-01	temozolomide, temsirolimus	temozolomide, m&b-39831, ccrg-81045, m&b 39831, m-39831, nsc-362856, sch 52365, sch-52365, temodal, temomedac, temodar, temsirolimus, cci-779, torisel	1	NCT01019434	Phase 2	Phase 2	Compound id 27258 - TEMOZOLOMIDE,Compound id 1039526 - TEMSIROLIMUS
Safety and Efficacy Study of Torisel and Liposomal Doxorubicin for Patients With Recurrent Sarcoma	ATC Class - L01D - Cytotoxic antibiotics and related substances,ATC Class - L01X - Other antineoplastic agents in atc	Sarcoma		2012-09-01	2009-09-01	temsirolimus plus liposomal doxorubicin	doxorubicin, doxil, rubex, adriamycin, hydroxydaunorubicin, adriblastina, epirubicin hydrochloride impurity, doxorubicin-, nsc-123127, valrubicin impurity, doxorubicin, temsirolimus, cci-779, torisel	1	NCT00949325	Phase 1	Phase 1	Compound id 791569 - DOXORUBICIN,Compound id 1039526 - TEMSIROLIMUS
Chemotherapy and Biological Therapy in Treating Patients With Locally Advanced or Metastatic Kidney Cancer	ATC Class - L03A - Interferon,ATC Class - L01X - Other antineoplastic agents in atc,ATC Class - S01A - Antiinfective ophthalmologics,ATC Class - C07B - Beta blocking agents and thiazides,ATC Class - G03C - Estrogens, sex hormones and modulators of the genital system	Kidney Cancer		2003-11-01	2002-04-01	recombinant interferon alfa, temsirolimus	temsirolimus, cci-779, torisel, interferon, interferon alfa, interf, interferon alfa natural, interferon alpha, roferon-a, viraferon, wellferon	1	NCT00045370	Phase 1	Phase 1	Compound id 1039526 - TEMSIROLIMUS,Compound id 2741143 - INTERFERON,Compound id 2741155 - INTERFERON ALFA
Study Evaluating Neratinib In Combination With Temsirolimus In Subjects With Solid Tumors	ATC Class - L01X - Other antineoplastic agents in atc	Malignant Carcinoma, Neoplasms		2013-12-01	2009-04-01	Neratinib, Temsirolimus	neratinib, cdp-820, hki-272, way-179272, temsirolimus, cci-779, torisel	1	NCT00838539	Phase 1	Phase 1	Compound id 820443 - NERATINIB,Compound id 1039526 - TEMSIROLIMUS
Temsirolimus Plus Neratinib for Patients With Metastatic HER2-Amplified or Triple Negative Breast Cancer	ATC Class - L01X - Other antineoplastic agents in atc	Breast Cancer		2016-07-01	2010-04-01	Neratinib, Temsirolimus	neratinib, cdp-820, hki-272, way-179272, temsirolimus, cci-779, torisel	1	NCT01111825	Phase 1	Phase 1	Compound id 820443 - NERATINIB,Compound id 1039526 - TEMSIROLIMUS
Cixutumumab and Temsirolimus in Treating Patients With Locally Advanced or Metastatic Cancer	ATC Class - L01X - Other antineoplastic agents in atc	Malignant Neoplasm		2015-10-01	2008-05-01	Cixutumumab, Laboratory Biomarker Analysis, Pharmacological Study, Temsirolimus	temsirolimus, cci-779, torisel, cixutumumab, imc-a12, nsc-742460	1	NCT00678769	Phase 1	Phase 1	Compound id 1039526 - TEMSIROLIMUS,Compound id 2728603 - CIXUTUMUMAB
CCI-779 in Treating Patients With Locally Advanced or Metastatic Pancreatic Cancer	ATC Class - L01X - Other antineoplastic agents in atc	Adenocarcinoma of the Pancreas, Recurrent Pancreatic Cancer, Stage II Pancreatic Cancer, Stage III Pancreatic Cancer, Stage IV Pancreatic Cancer		null	2003-12-01	laboratory biomarker analysis, temsirolimus	temsirolimus, cci-779, torisel	1	NCT00075647	Phase 2	Phase 2	Compound id 1039526 - TEMSIROLIMUS
Doxil, Bevacizumab and Temsirolimus Trial	ATC Class - L01D - Cytotoxic antibiotics and related substances,ATC Class - L01X - Other antineoplastic agents in atc,ATC Class - J07B - Viral vaccines	Advanced Cancer		2019-03-01	2008-08-01	Bevacizumab, Doxil, Temsirolimus	doxorubicin, doxil, rubex, adriamycin, hydroxydaunorubicin, adriblastina, epirubicin hydrochloride impurity, doxorubicin-, nsc-123127, valrubicin impurity, doxorubicin, doxorubicin hydrochloride, adriamycin rdf, doxorubicin hcl, adriamycin pfs, caelyx, doxil (liposomal), doxorubicin hydrochloride (liposomal), doxorubicin liposomal complex of the hydrochloride, liposomal doxorubicin hydrochloride,…	1	NCT00761644	Phase 1	Phase 1	Compound id 791569 - DOXORUBICIN,Compound id 826096 - DOXORUBICIN HYDROCHLORIDE,Compound id 1039526 - TEMSIROLIMUS,Compound id 2689088 - BEVACIZUMAB
Temsirolimus + Sorafenib in Advanced Hepatocellular Carcinoma (HCC)	ATC Class - L01X - Other antineoplastic agents in atc	Hepatocellular Carcinoma		null	2011-04-01	Temsirolimus + Sorafenib	sorafenib, bay 43-9006, bay-43-9006, nexavar, temsirolimus, cci-779, torisel	1	NCT01335074	Phase 1	Phase 1	Compound id 429624 - SORAFENIB,Compound id 1039526 - TEMSIROLIMUS
Temsirolimus and Dexamethasone in Treating Patients With Recurrent or Refractory Multiple Myeloma	ATC Class - R01A - Decongestants and other nasal preparations for topical use,ATC Class - A01A - Stomatological preparations,ATC Class - S01B - Antiinflammatory agents, ophthalmologic,ATC Class - S03B - Corticosteroid ophthalmologic and otologic preparations,ATC Class - D07A - Corticosteroid dermatological preparations, plain,ATC Class - D10A - Anti-acne preparations for topical use,ATC Class - C…	Refractory Multiple Myeloma, Stage I Multiple Myeloma, Stage II Multiple Myeloma, Stage III Multiple Myeloma		null	2008-12-01	dexamethasone, laboratory biomarker analysis, temsirolimus	dexamethasone, decadron-la, dexacen-4, dexacort, dexair, mymethasone, neodecadron, dalalone, kortico injection, aeroseb-dex, decaderm, decadron-75, decaspray, dexacortisyl, dexafree, dexamethasone intensol, dexamethasone metasulfobenzoate sodium, dexamethasone palmitate, dexamethasone valerate, dexone 0.5, dexone 0.75, dexone 1.5, dexone 4, dexsol, dextenza, dexycu, dexycu kit, dropodex, decadron…	1	NCT00693433	Phase 1	Phase 1	Compound id 1903831 - DEXAMETHASONE,Compound id 1039526 - TEMSIROLIMUS
Study Evaluating Interferon And CCI-779 In Advanced Renal Cell Carcinoma	ATC Class - L03A - Interferon,ATC Class - L01X - Other antineoplastic agents in atc,ATC Class - S01A - Antiinfective ophthalmologics,ATC Class - C07B - Beta blocking agents and thiazides,ATC Class - G03C - Estrogens, sex hormones and modulators of the genital system	Carcinoma, Renal Cell, Kidney Neoplasms		2011-03-01	2003-07-01	CCI-779, Interferon Alfa, Interferon Alfa and CCI-779	temsirolimus, cci-779, torisel, interferon, interferon alfa, interf, interferon alfa natural, interferon alpha, roferon-a, viraferon, wellferon	1	NCT00065468	Phase 3	Phase 3	Compound id 1039526 - TEMSIROLIMUS,Compound id 2741143 - INTERFERON,Compound id 2741155 - INTERFERON ALFA
Temsirolimus, Bendamustine and Rituximab for Relapsed Follicular Lymphoma or Mantle Cell Lymphoma	ATC Class - L01X - Other antineoplastic agents in atc	Follicular Lymphoma, Mantle Cell Lymphoma		2017-09-01	2010-02-01	Temsirolimus, Rituximab, Bendamustin	temsirolimus, cci-779, torisel, rituximab, abp-798, abp798, ct-p10, hs-006, hs-006 (rituximab biosimilar), hs006, idec-102, idec-c2b8, mabthera, mabthera rituxan, r-105 idec-102, rg-105, rhcacd20ma, rituximab (genetical recombination), rituxan, sait-101, sait101, usp mab 001, monoclonal igg1, truxima, rituximab-abbs	1	NCT01078142	Phase 1	Phase 1	Compound id 1039526 - TEMSIROLIMUS,Compound id 2689081 - RITUXIMAB
Temsirolimus In Phase 0	ATC Class - L01X - Other antineoplastic agents in atc	Advanced Cancer		null	2010-08-01	Temsirolimus	temsirolimus, cci-779, torisel	1	NCT01417065	Early Phase 1	Early Phase 1	Compound id 1039526 - TEMSIROLIMUS
Temsirolimus Adventitial Delivery to Improve Angiographic Outcomes Below the Knee (TANGO)	ATC Class - L01X - Other antineoplastic agents in atc	Chronic Limb Ischemia		2021-09-01	2017-03-01	Saline, Temsirolimus	temsirolimus, cci-779, torisel	1	NCT02908035	Phase 2	Phase 2	Compound id 1039526 - TEMSIROLIMUS
A Rollover Protocol to Allow Continued Access to Tivozanib (AV 951) for Subjects Enrolled in Other Tivozanib Protocols	ATC Class - L01X - Other antineoplastic agents in atc,ATC Class - L01B - Antimetabolites,ATC Class - L01C - Plant alkaloids and other natural products, antineoplastic drugs	Solid Tumors		2015-10-01	2010-06-01	Tivo, Tivozanib, Tivozanib (AV-951), Tivozanib + capecitabine, Tivozanib + paclitaxel, Tivozanib + temsirolimus	tivozanib, asp-4130, av-951, fotivda, kil8951, krn-951, kil-8951, tivozanib hydrochloride, tivozanib hydrochloride monohydrate, paclitaxel, abi-007, abi-007 component paclitaxel, abraxane, bms 181339-01, bms-181339-01, dhp 107, dhp-107, mbt 0206, mbt-0206, nk 105, nk-105, nsc-125973, pacitaxel, paxene, qw-8184, taxol, taxol 100, temsirolimus, cci-779, torisel, capecitabine, xeloda, ro 09-1978/000…	1	NCT01369433	null		Compound id 436369 - TIVOZANIB,Compound id 595746 - TIVOZANIB HYDROCHLORIDE,Compound id 991478 - PACLITAXEL,Compound id 1039526 - TEMSIROLIMUS,Compound id 1614588 - CAPECITABINE
Study Evaluating CCI-779 and Letrozole in Post-menopausal Women With Breast Cancer	ATC Class - L02B - Hormone antagonists and related agents,ATC Class - L01X - Other antineoplastic agents in atc	Breast Neoplasms, Neoplasm Metastasis		2006-10-01	2004-05-01	Letrozole for 34 months, Temsirolimus (CCI-779) for 34 months	temsirolimus, cci-779, torisel, letrozole, cgs 20267, cgs-20267, femara	1	NCT00083993	Phase 3	Phase 3	Compound id 1039526 - TEMSIROLIMUS,Compound id 1321721 - LETROZOLE
Study Comparing Bevacizumab + Temsirolimus vs. Bevacizumab + Interferon-Alfa In Advanced Renal Cell Carcinoma Subjects	ATC Class - L01X - Other antineoplastic agents in atc,ATC Class - S01A - Antiinfective ophthalmologics,ATC Class - L03A - Interferon,ATC Class - J07B - Viral vaccines	Renal Cell Carcinoma		2015-04-01	2008-04-01	Bevacizumab, Bevacizumab, Interferon-Alfa 9MU, Temsirolimus	temsirolimus, cci-779, torisel, bevacizumab, 12-igg1, ava-1, avastin, bevacizumab beta, bi 695502, bs-503a, chs-5217, ct-16, ct-p16, ct-p16 (biosimilar of bevacizumab), fkb-238, hlx-04, hlx04, ibi305, pf-06439535, r-435, rg-435, rhumab-, rhumab-vegf, usp mab 002, monoclonal igg1, interferon	1	NCT00631371	Phase 3	Phase 3	Compound id 1039526 - TEMSIROLIMUS,Compound id 2689088 - BEVACIZUMAB,Compound id 2741143 - INTERFERON
INHIBITOR: Retrospective Study Of Patients With Renal Cell Carcinoma And Mantle Cell Lymphoma Treated With Temsirolimus	ATC Class - L01X - Other antineoplastic agents in atc	Carcinoma, Renal Cell, Lymphoma, Mantle-Cell		2015-04-01	2011-01-01	Temsirolimus (Non-Interventional Study)	temsirolimus, cci-779, torisel	1	NCT01367457	null		Compound id 1039526 - TEMSIROLIMUS
CCI-779 in Treating Patients With Prostate Cancer	ATC Class - L01X - Other antineoplastic agents in atc	Prostate Cancer		2004-03-01	2000-09-01	temsirolimus	temsirolimus, cci-779, torisel	1	NCT00012142	Phase 2	Phase 2	Compound id 1039526 - TEMSIROLIMUS
Study Evaluating CCI-779 in Relapsing Multiple Sclerosis	ATC Class - L01X - Other antineoplastic agents in atc	Multiple Sclerosis, Relapsing-Remitting		2005-11-01	2003-11-01	CCI-779	temsirolimus, cci-779, torisel	1	NCT00228397	Phase 2	Phase 2	Compound id 1039526 - TEMSIROLIMUS
Risk-Based Therapy in Treating Younger Patients With Newly Diagnosed Liver Cancer	ATC Class - L01C - Plant alkaloids and other natural products, antineoplastic drugs,ATC Class - L01D - Cytotoxic antibiotics and related substances,ATC Class - V03A - All other therapeutic products,ATC Class - L01B - Antimetabolites,ATC Class - L01X - Other antineoplastic agents in atc,ATC Class - B02B - Vitamin k and other hemostatics,ATC Class - J07B - Viral vaccines	PRETEXT Stage 1 Hepatoblastoma, PRETEXT Stage 2 Hepatoblastoma, PRETEXT Stage 3 Hepatoblastoma, PRETEXT Stage 4 Hepatoblastoma		null	2009-09-01	Cisplatin, Dexrazoxane, Doxorubicin Hydrochloride, Fluorouracil, Irinotecan Hydrochloride, Laboratory Biomarker Analysis, Liver Transplantation, Temsirolimus, Therapeutic Conventional Surgery, Vincristine Sulfate	fluorouracil, 5-fu, 5-fluorouracil, 5 fu, 5.f.u., accusite, actikerall, adrucil, carac, efudix, efudex, fluoro-uracil roche, fluracil, fluoroplex, nsc-19893, ro 2-9757, ro-2-9757, ro-29757, tolak, doxorubicin, doxil, rubex, adriamycin, hydroxydaunorubicin, adriblastina, epirubicin hydrochloride impurity, doxorubicin-, nsc-123127, valrubicin impurity, doxorubicin, doxorubicin hydrochloride, adriam…	1	NCT00980460	Phase 3	Phase 3	Compound id 23643 - FLUOROURACIL,Compound id 791569 - DOXORUBICIN,Compound id 826096 - DOXORUBICIN HYDROCHLORIDE,Compound id 881410 - IRINOTECAN,Compound id 926244 - IRINOTECAN HYDROCHLORIDE,Compound id 986271 - VINCRISTINE,Compound id 998224 - VINCRISTINE SULFATE,Compound id 1039526 - TEMSIROLIMUS,Compound id 1128101 - DEXRAZOXANE,Compound id 2685970 - CISPLATIN
Effect of P-glycoprotein Inhibition on Lenalidomide Pharmacokinetics in Healthy Males	ATC Class - R06A - Antihistamines for systemic use,ATC Class - D04A - Antipruritics, incl. antihistamines, anesthetics, etc.,ATC Class - L01X - Other antineoplastic agents in atc,ATC Class - L04A - Immunosuppressants,ATC Class - C01B - Antiarrhythmics, class i and iii	Healthy		2013-01-01	2012-10-01	Diphenhydramine, Lenalidomide, Quinidine, Temsirolimus	diphenhydramine, antitussive, beldin, belix, benadryl, benylin, dibenil, diphen, hydramine, silphen, temsirolimus, cci-779, torisel, lenalidomide, cc-5013, cdc-501, revlimid, syp-1512, quinidine	1	NCT01712828	Phase 1	Phase 1	Compound id 1121855 - DIPHENHYDRAMINE,Compound id 1039526 - TEMSIROLIMUS,Compound id 1113909 - LENALIDOMIDE,Compound id 1490042 - QUINIDINE
Efficacy and Safety of Bevacizumab/Temsirolimus Combination to Treat Advanced Renal Cell Carcinoma	ATC Class - L01X - Other antineoplastic agents in atc,ATC Class - J07B - Viral vaccines	Kidney Cancer		2015-07-01	2010-12-01	Bevacizumab, Temsirolimus	temsirolimus, cci-779, torisel, bevacizumab, 12-igg1, ava-1, avastin, bevacizumab beta, bi 695502, bs-503a, chs-5217, ct-16, ct-p16, ct-p16 (biosimilar of bevacizumab), fkb-238, hlx-04, hlx04, ibi305, pf-06439535, r-435, rg-435, rhumab-, rhumab-vegf, usp mab 002, monoclonal igg1	1	NCT01264341	Phase 2	Phase 2	Compound id 1039526 - TEMSIROLIMUS,Compound id 2689088 - BEVACIZUMAB
Combination of Cisplatin, Cetuximab and Temsirolimus in Recurrent or Metastatic Squamous Cell Carcinoma of the Head and Neck	ATC Class - L01X - Other antineoplastic agents in atc,ATC Class - B02B - Vitamin k and other hemostatics	Squamous Cell Carcinoma of the Head and Neck		2012-12-01	2010-02-01	cetuximab, cisplatin, temsirolimus	temsirolimus, cci-779, torisel, cisplatin, cisplatinum, cis-diamminedichloroplatinum(ii), cis-ddp, cis-platinum ii, int-230-6 component cisplatin, int230-6 component cisplatin, liplacis, nsc-119875, platinol-aq, platinol, cetuximab, abp-494, c-225, c225, cetuximab (genetical recombination), cmab-009, cmab009, erbitux, imc-225, imc-c225, moab c225	1	NCT01015664	Phase 1	Phase 1	Compound id 1039526 - TEMSIROLIMUS,Compound id 2685970 - CISPLATIN,Compound id 2689082 - CETUXIMAB
AZD2171 and Temsirolimus in Patients With Advanced Gynecological Malignancies	ATC Class - L01X - Other antineoplastic agents in atc	Cervical Cancer, Endometrial Cancer, Fallopian Tube Cancer, Ovarian Cancer, Peritoneal Cancer		2021-03-01	2010-02-01	cediranib, temsirolimus	cediranib, azd-2171, azd2171, recentin, zd-2171, temsirolimus, cci-779, torisel	1	NCT01065662	Phase 1	Phase 1	Compound id 534296 - CEDIRANIB,Compound id 1039526 - TEMSIROLIMUS
Impact of Temsirolimus Therapy on Circulating Tumor Cell Biology In Men With Castration Resistant Metastatic Prostate Cancer	ATC Class - R06A - Antihistamines for systemic use,ATC Class - D04A - Antipruritics, incl. antihistamines, anesthetics, etc.,ATC Class - L01X - Other antineoplastic agents in atc	Prostate Cancer		2012-08-01	2009-07-01	Diphenhydramine, Temsirolimus	diphenhydramine, antitussive, beldin, belix, benadryl, benylin, dibenil, diphen, hydramine, silphen, temsirolimus, cci-779, torisel	1	NCT00887640	Phase 2	Phase 2	Compound id 1121855 - DIPHENHYDRAMINE,Compound id 1039526 - TEMSIROLIMUS
A Phase 1b, Open-Label, Dose-Finding Study to Evaluate the Safety of Tivozanib (AV-951) in Combination With Temsirolimus in Subjects With Metastatic Renal Cell Carcinoma	ATC Class - L01X - Other antineoplastic agents in atc	Renal Cell Carcinoma		2011-02-01	2007-11-01	tivozanib (AV-951) plus temsirolimus	tivozanib, asp-4130, av-951, fotivda, kil8951, krn-951, kil-8951, tivozanib hydrochloride, tivozanib hydrochloride monohydrate, temsirolimus, cci-779, torisel	1	NCT00563147	Phase 1	Phase 1	Compound id 436369 - TIVOZANIB,Compound id 595746 - TIVOZANIB HYDROCHLORIDE,Compound id 1039526 - TEMSIROLIMUS
Temsirolimus as Second-line Therapy in HCC	ATC Class - L01X - Other antineoplastic agents in atc	Unresectable or Metastatic Hepatocellular Carcinoma		2013-03-01	2010-02-01	Temsirolimus	temsirolimus, cci-779, torisel	1	NCT01567930	Phase 2	Phase 2	Compound id 1039526 - TEMSIROLIMUS
Study of Nivolumab Plus Chemotherapy in Patients With Advanced Cancer (NivoPlus)	ATC Class - L01X - Other antineoplastic agents in atc,ATC Class - L01B - Antimetabolites	Advanced Cancer, Colorectal Carcinoma, Endometrial, Non Small Cell Lung Cancer, Pancreatic Cancer, Renal Cell Cancer, Uterine		2017-11-01	2015-04-01	Irinotecan, Irinotecan + capecitabine, Temsirolimus, nivolumab	irinotecan, camptosar, temsirolimus, cci-779, torisel, capecitabine, xeloda, ro 09-1978/000, ro-09-1978000, ro-091978000, nivolumab, bms-936558, bms-986298, mdx-1106, ono-4538, opdivo	1	NCT02423954	Phase 1	Phase 1	Compound id 881410 - IRINOTECAN,Compound id 1039526 - TEMSIROLIMUS,Compound id 1614588 - CAPECITABINE,Compound id 2741388 - NIVOLUMAB
A Post Marketing Surveillance As Required By Philippine Food And Drug Administration	ATC Class - L01X - Other antineoplastic agents in atc	Renal Cell Carcinoma		2015-06-01	2013-06-01	Temsirolimus	temsirolimus, cci-779, torisel	1	NCT01781442	null		Compound id 1039526 - TEMSIROLIMUS
Study of Velcade and Temsirolimus for Relapsed or Refractory Non-Hodgkin Lymphoma	ATC Class - L01X - Other antineoplastic agents in atc	Non-Hodgkins Lymphoma		2014-06-01	2011-02-01	Temsirolimus, Velcade	temsirolimus, cci-779, torisel, bortezomib, velcade, bortezomib hydrate, ldp-341, nsc-681239, ps-341	1	NCT01281917	Phase 2	Phase 2	Compound id 1039526 - TEMSIROLIMUS,Compound id 1901573 - BORTEZOMIB
Evaluation of a Promising New Combination of Protein Kinase Inhibitors on Organotypic Cultures of Human Renal Tumors	ATC Class - L01X - Other antineoplastic agents in atc	Kidney Cancer		2024-09-01	2017-10-01	CK2 and ATM inhibitors serine/ threonin Kinase combination, Pazopanib, Sunitinib, Temsirolimus	serine, l-serine, nsc-118365, ser_leo2_dhg, ser_lfzw_dhg, ser_lfoh, ser_lfoh_dhg, ser_lfzw, ser_leo2, ser_leo2h_dhg, ser_leo2h, sunitinib, sutent, su-011248, su-11248, su011248, pazopanib, gw786034, votrient, temsirolimus, cci-779, torisel	1	NCT03571438	null		Compound id 1116 - SERINE,Compound id 154683 - SUNITINIB,Compound id 340003 - PAZOPANIB,Compound id 1039526 - TEMSIROLIMUS
Temsirolimus, Temozolomide, and Radiation Therapy in Treating Patients With Newly Diagnosed Glioblastoma Multiforme	ATC Class - L01X - Other antineoplastic agents in atc,ATC Class - L01A - Alkylating agents	Adult Giant Cell Glioblastoma, Adult Glioblastoma, Adult Gliosarcoma		null	2006-05-01	3-dimensional conformal radiation therapy, adjuvant therapy, intensity-modulated radiation therapy, pharmacological study, temozolomide, temsirolimus	temozolomide, m&b-39831, ccrg-81045, m&b 39831, m-39831, nsc-362856, sch 52365, sch-52365, temodal, temomedac, temodar, temsirolimus, cci-779, torisel	1	NCT00316849	Phase 1	Phase 1	Compound id 27258 - TEMOZOLOMIDE,Compound id 1039526 - TEMSIROLIMUS
Ixabepilone and Temsirolimus in Treating Patients With Solid Tumors That Are Metastatic or Cannot Be Removed by Surgery	ATC Class - L01D - Cytotoxic antibiotics and related substances,ATC Class - L01X - Other antineoplastic agents in atc	Adult Solid Neoplasm		null	2011-06-01	Ixabepilone, Pharmacological Study, Temsirolimus	ixabepilone, ixempra, bms 247550-01, bms-247550, bms-247550-01, ixempra kit, temsirolimus, cci-779, torisel	1	NCT01375829	Phase 1	Phase 1	Compound id 632492 - IXABEPILONE,Compound id 1039526 - TEMSIROLIMUS
Study of the mTOR Inhibitor Temsirolimus (CCI-779) to Treat Ovarian Cancer With CA125 Only Relapse	ATC Class - L01X - Other antineoplastic agents in atc	Ovarian Cancer		2011-10-01	2009-06-01	Temsirolimus	temsirolimus, cci-779, torisel	1	NCT00926107	Phase 2	Phase 2	Compound id 1039526 - TEMSIROLIMUS
Study of Temsirolimus, Topotecan, and Bortezomib	ATC Class - L01X - Other antineoplastic agents in atc	Advanced Cancer		2012-11-01	2008-09-01	Hycamtin (Topotecan), Torisel (Temsirolimus), Velcade (Bortezomib)	topotecan, hycamtin, nsc-609699, potactasol, skf-104864, topotecan hydrochloride, sk&f-s-104864a, sk-s-104864-a, hycamptin, nogitecan hydrochloride, sk&f s-104864-a, topotecan hcl, temsirolimus, cci-779, torisel, bortezomib, velcade, bortezomib hydrate, ldp-341, nsc-681239, ps-341	1	NCT00770731	Phase 1	Phase 1	Compound id 321984 - TOPOTECAN,Compound id 419648 - TOPOTECAN HYDROCHLORIDE,Compound id 1039526 - TEMSIROLIMUS,Compound id 1901573 - BORTEZOMIB
Temsirolimus, Carboplatin, and Paclitaxel as First-Line Therapy in Treating Patients With Newly Diagnosed Stage III-IV Clear Cell Ovarian Cancer	ATC Class - L01X - Other antineoplastic agents in atc,ATC Class - L01C - Plant alkaloids and other natural products, antineoplastic drugs	Ovarian Clear Cell Cystadenocarcinoma, Stage III Ovarian Cancer, Stage IV Ovarian Cancer		2015-01-01	2010-08-01	Carboplatin, Docetaxel, Laboratory Biomarker Analysis, Paclitaxel, Temsirolimus	docetaxel, bind 014, ckd-810, docefrez, docetaxel anhydrous, docetaxel hydrate, docetaxel trihydrate, nsc-628503, rp 56976, rp-56976, taxceus, taxotere, xrp6976, paclitaxel, abi-007, abi-007 component paclitaxel, abraxane, bms 181339-01, bms-181339-01, dhp 107, dhp-107, mbt 0206, mbt-0206, nk 105, nk-105, nsc-125973, pacitaxel, paxene, qw-8184, taxol, taxol 100, temsirolimus, cci-779, torisel, ca…	1	NCT01196429	Phase 2	Phase 2	Compound id 990319 - DOCETAXEL,Compound id 991478 - PACLITAXEL,Compound id 1039526 - TEMSIROLIMUS,Compound id 2702494 - CARBOPLATIN
CCI-779 in Treating Patients With Relapsed or Refractory Chronic Lymphocytic Leukemia	ATC Class - L01X - Other antineoplastic agents in atc	Recurrent Adult Diffuse Large Cell Lymphoma, Recurrent Adult Hodgkin Lymphoma, Refractory Chronic Lymphocytic Leukemia		null	2004-05-01	laboratory biomarker analysis, temsirolimus	temsirolimus, cci-779, torisel	1	NCT00086840	Phase 2	Phase 2	Compound id 1039526 - TEMSIROLIMUS
Gemcitabine Hydrochloride, Cisplatin, and Temsirolimus as First-Line Therapy in Treating Patients With Locally Advanced and/or Metastatic Transitional Cell Cancer of the Urothelium	ATC Class - L01B - Antimetabolites,ATC Class - L01X - Other antineoplastic agents in atc,ATC Class - B02B - Vitamin k and other hemostatics	Bladder Cancer, Transitional Cell Cancer of the Renal Pelvis and Ureter, Urethral Cancer		2016-03-01	2008-02-01	cisplatin, gemcitabine hydrochloride, pharmacological study, temsirolimus	temsirolimus, cci-779, torisel, gemcitabine, gemzar, ly-188011, ly188011, nsc-613327, gemcitabine hydrochloride, infugem, ly-188011 hydrochloride, ly188011 hydrochloride, cisplatin, cisplatinum, cis-diamminedichloroplatinum(ii), cis-ddp, cis-platinum ii, int-230-6 component cisplatin, int230-6 component cisplatin, liplacis, nsc-119875, platinol-aq, platinol	1	NCT01090466	Phase 1	Phase 1	Compound id 1039526 - TEMSIROLIMUS,Compound id 1072154 - GEMCITABINE,Compound id 1134085 - GEMCITABINE HYDROCHLORIDE,Compound id 2685970 - CISPLATIN
Temsirolimus for Relapsed/Refractory Hodgkin's Lymphoma	ATC Class - L01X - Other antineoplastic agents in atc	Hodgkin's Lymphoma		2017-10-01	2009-01-01	Temsirolimus	temsirolimus, cci-779, torisel	1	NCT00838955	Phase 2	Phase 2	Compound id 1039526 - TEMSIROLIMUS
Phosphatidylinositol 3 Kinase and Mammalian Target of Rapamycin (PI3K-mTOR) in Advanced Cancer Patients	ATC Class - L01X - Other antineoplastic agents in atc	Advanced Cancers		2014-06-01	2009-04-01	Temsirolimus	temsirolimus, cci-779, torisel	1	NCT00877773	Phase 1	Phase 1	Compound id 1039526 - TEMSIROLIMUS
CCI-779 in Treating Patients With Relapsed or Refractory Acute Myeloid Leukemia, Acute Lymphoblastic Leukemia, Myelodysplastic Syndromes, or Chronic Myelogenous Leukemia in Blastic Phase	ATC Class - L01X - Other antineoplastic agents in atc	Adult Acute Myeloid Leukemia With 11q23 (MLL) Abnormalities, Adult Acute Myeloid Leukemia With Inv(16)(p13;q22), Adult Acute Myeloid Leukemia With t(15;17)(q22;q12), Adult Acute Myeloid Leukemia With t(16;16)(p13;q22), Adult Acute Myeloid Leukemia With t(8;21)(q22;q22), Blastic Phase Chronic Myelogenous Leukemia, Chronic Myelomonocytic Leukemia, Previously Treated Myelodysplastic Syndromes, Recur…		null	2004-04-01	laboratory biomarker analysis, temsirolimus	temsirolimus, cci-779, torisel	1	NCT00084916	Phase 2	Phase 2	Compound id 1039526 - TEMSIROLIMUS
Temsirolimus, Carboplatin, and Paclitaxel in Treating Patients With Advanced Solid Tumors	ATC Class - L01X - Other antineoplastic agents in atc,ATC Class - L01C - Plant alkaloids and other natural products, antineoplastic drugs	Ovarian Sarcoma, Ovarian Stromal Cancer, Recurrent Endometrial Carcinoma, Recurrent Ovarian Epithelial Cancer, Recurrent Ovarian Germ Cell Tumor, Stage III Endometrial Carcinoma, Stage III Ovarian Epithelial Cancer, Stage III Ovarian Germ Cell Tumor, Stage IV Endometrial Carcinoma, Stage IV Ovarian Epithelial Cancer, Stage IV Ovarian Germ Cell Tumor, Unspecified Adult Solid Tumor, Protocol Specif…		null	2007-02-01	carboplatin, paclitaxel, temsirolimus	paclitaxel, abi-007, abi-007 component paclitaxel, abraxane, bms 181339-01, bms-181339-01, dhp 107, dhp-107, mbt 0206, mbt-0206, nk 105, nk-105, nsc-125973, pacitaxel, paxene, qw-8184, taxol, taxol 100, temsirolimus, cci-779, torisel, carboplatin, paraplatin, carboplatine, jm-8, nsc-201345, nsc-241240	1	NCT00408655	Phase 1	Phase 1	Compound id 991478 - PACLITAXEL,Compound id 1039526 - TEMSIROLIMUS,Compound id 2702494 - CARBOPLATIN
An Open Label Exploratory Study in Newly Diagnosed Prostate Cancer Patients	ATC Class - L01X - Other antineoplastic agents in atc	Prostatic Neoplasms		2007-09-01	2004-01-01	temsirolimus	temsirolimus, cci-779, torisel	1	NCT00235794	null		Compound id 1039526 - TEMSIROLIMUS
A Feasibility, Dose-Escalation Study Using Intracerebral Microdialysis to Assess the Neuropharmacodynamics of Temsirolimus in Patients With Primary or Metastatic Brain Tumors	ATC Class - L01X - Other antineoplastic agents in atc	Brain and Central Nervous System Tumors, Metastatic Cancer		2010-11-01	2008-06-01	cytokine levels, pharmacological study, temsirolimus	temsirolimus, cci-779, torisel	1	NCT00784914	Phase 1	Phase 1	Compound id 1039526 - TEMSIROLIMUS
Implantable Microdevice for the Delivery of Drugs and Their Effect on Tumors in Patients With Metastatic or Recurrent Sarcoma	ATC Class - L01X - Other antineoplastic agents in atc,ATC Class - L04A - Immunosuppressants,ATC Class - A06A - Drugs for constipation,ATC Class - L01C - Plant alkaloids and other natural products, antineoplastic drugs,ATC Class - L01D - Cytotoxic antibiotics and related substances,ATC Class - L01A - Alkylating agents	Metastatic Sarcoma, Recurrent Sarcoma, Resectable Sarcoma		2024-12-01	2022-01-01	Doxorubicin, Doxorubicin Hydrochloride, Drug Delivery Microdevice, Everolimus, Ganitumab, Ifosfamide, Irinotecan, Pazopanib, Polyethylene Glycol, Temozolomide, Temsirolimus, Therapeutic Conventional Surgery, Vincristine	temozolomide, m&b-39831, ccrg-81045, m&b 39831, m-39831, nsc-362856, sch 52365, sch-52365, temodal, temomedac, temodar, ifosfamide, ifsofamide, ifex, mitoxana, mjf 9325, mjf-9325, nsc-109724, z-4942, z4942, pazopanib, gw786034, votrient, doxorubicin, doxil, rubex, adriamycin, hydroxydaunorubicin, adriblastina, epirubicin hydrochloride impurity, doxorubicin-, nsc-123127, valrubicin impurity, doxor…	1	NCT04199026	Early Phase 1	Early Phase 1	Compound id 27258 - TEMOZOLOMIDE,Compound id 30136 - IFOSFAMIDE,Compound id 340003 - PAZOPANIB,Compound id 791569 - DOXORUBICIN,Compound id 826096 - DOXORUBICIN HYDROCHLORIDE,Compound id 881410 - IRINOTECAN,Compound id 986271 - VINCRISTINE,Compound id 1012475 - EVEROLIMUS,Compound id 1039526 - TEMSIROLIMUS,Compound id 2688982 - POLYETHYLENE GLYCOL,Compound id 2728626 - GANITUMAB
Temsirolimus in Treating Patients With Locally Advanced or Metastatic Breast Cancer	ATC Class - L01X - Other antineoplastic agents in atc	Recurrent Breast Carcinoma, Stage III Breast Cancer AJCC v7, Stage IIIA Breast Cancer AJCC v7, Stage IIIB Breast Cancer AJCC v7, Stage IIIC Breast Cancer AJCC v7, Stage IV Breast Cancer AJCC v6 and v7		2019-12-01	2006-07-01	Laboratory Biomarker Analysis, Temsirolimus	temsirolimus, cci-779, torisel	1	NCT00376688	Phase 2	Phase 2	Compound id 1039526 - TEMSIROLIMUS
Study of Ibrutinib (a Bruton's Tyrosine Kinase Inhibitor), Versus Temsirolimus in Patients With Relapsed or Refractory Mantle Cell Lymphoma Who Have Received at Least One Prior Therapy	ATC Class - L01X - Other antineoplastic agents in atc	Mantle Cell Lymphoma		2016-12-01	2012-12-01	Ibrutinib, Temsirolimus	ibrutinib, cra-032765, imbruvica, pc-32765, pci 32765, pci-32765, pci-32765-00, temsirolimus, cci-779, torisel	1	NCT01646021	Phase 3	Phase 3	Compound id 503835 - IBRUTINIB,Compound id 1039526 - TEMSIROLIMUS
Phase I Study of DOXIL and Temsirolimus in Resistant Solid Malignancies	ATC Class - L01D - Cytotoxic antibiotics and related substances,ATC Class - L01X - Other antineoplastic agents in atc	Resistant Solid Malignancies		2011-07-01	2008-03-01	Pegylated liposomal doxorubicin, Temsirolimus	doxorubicin, doxil, rubex, adriamycin, hydroxydaunorubicin, adriblastina, epirubicin hydrochloride impurity, doxorubicin-, nsc-123127, valrubicin impurity, doxorubicin, temsirolimus, cci-779, torisel	1	NCT00703170	Phase 1	Phase 1	Compound id 791569 - DOXORUBICIN,Compound id 1039526 - TEMSIROLIMUS
Cixutumumab and Temsirolimus in Treating Younger Patients With Solid Tumors That Have Recurred or Not Responded to Treatment	ATC Class - L01X - Other antineoplastic agents in atc	Unspecified Childhood Solid Tumor, Protocol Specific		null	2009-04-01	cixutumumab, laboratory biomarker analysis, pharmacological study, temsirolimus	temsirolimus, cci-779, torisel, cixutumumab, imc-a12, nsc-742460	1	NCT00880282	Phase 1	Phase 1	Compound id 1039526 - TEMSIROLIMUS,Compound id 2728603 - CIXUTUMUMAB
Bevacizumab and Temsirolimus in Patients With Advanced Malignancy	ATC Class - L01X - Other antineoplastic agents in atc,ATC Class - J07B - Viral vaccines	Advanced Cancer		2017-11-01	2008-01-01	Additional Blood Drawn, Bevacizumab, Biopsy, DCE-MRI Scan, Temsirolimus	temsirolimus, cci-779, torisel, bevacizumab, 12-igg1, ava-1, avastin, bevacizumab beta, bi 695502, bs-503a, chs-5217, ct-16, ct-p16, ct-p16 (biosimilar of bevacizumab), fkb-238, hlx-04, hlx04, ibi305, pf-06439535, r-435, rg-435, rhumab-, rhumab-vegf, usp mab 002, monoclonal igg1	1	NCT00610493	Phase 1	Phase 1	Compound id 1039526 - TEMSIROLIMUS,Compound id 2689088 - BEVACIZUMAB
Temsirolimus Versus Sorafenib As Second-Line Therapy In Patients With Advanced RCC Who Have Failed First-Line Sunitinib	ATC Class - L01X - Other antineoplastic agents in atc	Renal Cell Carcinoma		2013-01-01	2007-09-01	Sorafenib, temsirolimus (Torisel)	sorafenib, bay 43-9006, bay-43-9006, nexavar, temsirolimus, cci-779, torisel	1	NCT00474786	Phase 3	Phase 3	Compound id 429624 - SORAFENIB,Compound id 1039526 - TEMSIROLIMUS
Temsirolimus and Vorinostat in Treating Patients With Metastatic Prostate Cancer	ATC Class - L01X - Other antineoplastic agents in atc	Adenocarcinoma of the Prostate, Hormone-resistant Prostate Cancer, Prostate Cancer, Recurrent Prostate Cancer, Stage IV Prostate Cancer		2016-08-01	2012-02-01	laboratory biomarker analysis, positron emission tomography/computed tomography, temsirolimus, vorinostat	temsirolimus, cci-779, torisel, vorinostat, mk-0683, mk0683, zolinza	1	NCT01174199	Phase 1	Phase 1	Compound id 1039526 - TEMSIROLIMUS,Compound id 1113023 - VORINOSTAT
Temsirolimus in Combination With Metformin in Patients With Advanced Cancers	ATC Class - A10B - Blood glucose lowering drugs, excl. insulins,ATC Class - L01X - Other antineoplastic agents in atc	Advanced Cancers		2020-03-01	2012-03-01	Metformin, Temsirolimus	metformin, la-6023, temsirolimus, cci-779, torisel	1	NCT01529593	Phase 1	Phase 1	Compound id 23928 - METFORMIN,Compound id 1039526 - TEMSIROLIMUS
Temsirolimus (Torisel) Drug Use Investigation (Regulatory Post Marketing Commitment Plan)	ATC Class - L01X - Other antineoplastic agents in atc	Renal Cell Carcinoma		2018-03-01	2010-08-01	Temsirolimus	temsirolimus, cci-779, torisel	1	NCT01210482	null		Compound id 1039526 - TEMSIROLIMUS
Trebananib And Temsirolimus in Treating Patients With Solid Tumors That Are Metastatic or Cannot Be Removed by Surgery	ATC Class - L01X - Other antineoplastic agents in atc	Adult Solid Neoplasm, Lung Carcinoid Tumor, Recurrent Digestive System Neuroendocrine Tumor G1, Recurrent Renal Cell Carcinoma, Recurrent Uterine Corpus Sarcoma, Stage III Renal Cell Cancer, Stage IIIB Uterine Sarcoma, Stage IIIC Uterine Sarcoma, Stage IV Renal Cell Cancer, Stage IVA Uterine Sarcoma, Stage IVB Uterine Sarcoma		2014-01-01	2012-03-01	Laboratory Biomarker Analysis, Pharmacological Study, Temsirolimus, Trebananib	temsirolimus, cci-779, torisel, trebananib, amg 386, amg-386, tovasanib	1	NCT01548482	Phase 1	Phase 1	Compound id 1039526 - TEMSIROLIMUS,Compound id 2741217 - TREBANANIB
Neoadjuvant CCI-779 Followed By Radical Prostatectomy in Treating Patients With Newly Diagnosed Prostate Cancer Who Have a High Risk of Relapse	ATC Class - L01X - Other antineoplastic agents in atc	Prostate Cancer		null	2003-08-01	conventional surgery, neoadjuvant therapy, temsirolimus	temsirolimus, cci-779, torisel	1	NCT00071968	Phase 2	Phase 2	Compound id 1039526 - TEMSIROLIMUS
Canadian Profiling and Targeted Agent Utilization Trial (CAPTUR)	ATC Class - L01X - Other antineoplastic agents in atc	Advanced Solid Tumors, Lymphoma, Non-Hodgkin, Multiple Myeloma		2023-09-01	2017-10-01	Axitinib, Bosutinib, Crizotinib, Dasatinib, Erlotinib, Nivolumab plus Ipilimumab, Olaparib, Palbociclib, Sunitinib, Temsirolimus, Trastuzumab plus Pertuzumab, Vemurafenib plus Cobimetinib, Vismodegib	erlotinib, osi-774, ro-508231, cp-358,774, cp-358774, cp-35877401, r-1415, rg-1415, tarceva, sunitinib, sutent, su-011248, su-11248, su011248, crizotinib, pf-2341066, pf-02341066, xalkori, cobimetinib, cotellic, gdc-0623, gdc-0973, rg 7420, rg-7420, rg-7421, rg7420, xl-518, olaparib, az-2281, az2281, azd-2281, azd2281, keylynk-010 component olaparib, ku-0059436, ku-59436, lynparza, olaparib compo…	1	NCT03297606	Phase 2	Phase 2	Compound id 141944 - ERLOTINIB,Compound id 154683 - SUNITINIB,Compound id 259783 - CRIZOTINIB,Compound id 295586 - COBIMETINIB,Compound id 422599 - OLAPARIB,Compound id 495280 - PALBOCICLIB,Compound id 501089 - DASATINIB,Compound id 505877 - VEMURAFENIB,Compound id 679371 - BOSUTINIB,Compound id 1039526 - TEMSIROLIMUS,Compound id 1811695 - VISMODEGIB,Compound id 1927385 - AXITINIB,Compound id 268…
Bevacizumab and Temsirolimus Alone or in Combination With Valproic Acid or Cetuximab in Treating Patients With Advanced or Metastatic Malignancy or Other Benign Disease	ATC Class - N03A - Antiepileptics,ATC Class - L01X - Other antineoplastic agents in atc,ATC Class - J07B - Viral vaccines	Advanced Malignant Neoplasm, Castleman Disease, Digestive System Carcinoma, Erdheim-Chester Disease, Lip and Oral Cavity Carcinoma, Lymphangioleiomyomatosis, Malignant Endocrine Neoplasm, Malignant Female Reproductive System Neoplasm, Malignant Male Reproductive System Neoplasm, Malignant Neoplasm, Malignant Respiratory Tract Neoplasm, Malignant Thoracic Neoplasm, Malignant Urinary System Neoplas…		2021-03-01	2012-03-01	Bevacizumab, Cetuximab, Laboratory Biomarker Analysis, Pharmacological Study, Temsirolimus, Valproic Acid	valproic acid, 44089, convulex, depakote, depakene, nsc-93819, stavzor, valproic, temsirolimus, cci-779, torisel, cetuximab, abp-494, c-225, c225, cetuximab (genetical recombination), cmab-009, cmab009, erbitux, imc-225, imc-c225, moab c225, bevacizumab, 12-igg1, ava-1, avastin, bevacizumab beta, bi 695502, bs-503a, chs-5217, ct-16, ct-p16, ct-p16 (biosimilar of bevacizumab), fkb-238, hlx-04, hlx…	1	NCT01552434	Phase 1	Phase 1	Compound id 45378 - VALPROIC ACID,Compound id 1039526 - TEMSIROLIMUS,Compound id 2689082 - CETUXIMAB,Compound id 2689088 - BEVACIZUMAB
Neo-adjuvant Temsirolimus in Patients With Advanced Renal Cell Carcinoma	ATC Class - L01X - Other antineoplastic agents in atc	Renal Cell Carcinoma		2014-08-01	2008-09-01	Temsirolimus (pre surgery)	temsirolimus, cci-779, torisel	1	NCT01404104	null		Compound id 1039526 - TEMSIROLIMUS
Temsirolimus to Reverse Androgen Insensitivity for Castration-resistant Prostate Cancer	ATC Class - L02B - Hormone antagonists and related agents,ATC Class - L01X - Other antineoplastic agents in atc	Androgen-insensitive Prostate Cancer, Castrate-resistant Prostate Cancer (CRPC), Hormone-refractory Prostate Cancer, Metastatic Disease, Prostate Cancer, Prostatic Neoplasms		2012-04-01	2009-10-01	Casodex (bicalutamide), Temsirolimus	bicalutamide, cosudex, calutide, kalumid, casodex, ici 176,334, ici-176334, ici176,334-1, temsirolimus, cci-779, torisel	1	NCT01020305	Phase 1	Phase 1	Compound id 141656 - BICALUTAMIDE,Compound id 1039526 - TEMSIROLIMUS
Temsirolimus and Sorafenib in Advanced Hepatocellular Carcinoma	ATC Class - L01X - Other antineoplastic agents in atc	Hepatocellular Carcinoma		2013-06-01	2009-11-01	sorafenib with temsirolimus	sorafenib, bay 43-9006, bay-43-9006, nexavar, temsirolimus, cci-779, torisel	1	NCT01008917	Phase 1	Phase 1	Compound id 429624 - SORAFENIB,Compound id 1039526 - TEMSIROLIMUS
Temsirolimus in Treating Patients With Metastatic Solid Tumor or Lymphoma That Cannot Be Removed By Surgery Who Have Different Levels of Liver Function	ATC Class - L01X - Other antineoplastic agents in atc	Hepatic Complications, Lymphoma, Unspecified Adult Solid Tumor, Protocol Specific		null	2005-12-01	laboratory biomarker analysis, pharmacological study, temsirolimus	temsirolimus, cci-779, torisel	1	NCT00275093	Phase 1	Phase 1	Compound id 1039526 - TEMSIROLIMUS
Hydroxychloroquine and Temsirolimus in Treating Patients With Metastatic Solid Tumors That Have Not Responded to Treatment	ATC Class - L01X - Other antineoplastic agents in atc,ATC Class - P01B - Antimalarials	Unspecified Adult Solid Tumor, Protocol Specific		2013-11-01	2008-10-01	autophagy inhibition therapy, electron microscopy, high performance liquid chromatography, hydroxychloroquine, immunologic technique, laboratory biomarker analysis, mass spectrometry, pharmacological study, temsirolimus	temsirolimus, cci-779, torisel, hydroxychloroquine	1	NCT00909831	Phase 1	Phase 1	Compound id 1039526 - TEMSIROLIMUS,Compound id 1402207 - HYDROXYCHLOROQUINE
Therapeutic Trial for Patients With Ewing Sarcoma Family of Tumor and Desmoplastic Small Round Cell Tumors	ATC Class - L01X - Other antineoplastic agents in atc,ATC Class - L01C - Plant alkaloids and other natural products, antineoplastic drugs,ATC Class - L01D - Cytotoxic antibiotics and related substances,ATC Class - L01A - Alkylating agents,ATC Class - J07B - Viral vaccines	Desmoplastic Small Round Cell Tumor, Ewing Sarcoma of Bone or Soft Tissue, Localized Ewing Sarcoma/Peripheral Primitive Neuroectodermal Tumor, Metastatic Ewing Sarcoma/Peripheral Primitive Neuroectodermal Tumor		2026-07-01	2013-12-01	bevacizumab, cyclophosphamide, doxorubicin, etoposide, ifosfamide, radiation, sorafenib, surgery, temozolomide, temsirolimus, vincristine	cyclophosphamide, b-518, cyclophosphamide anhydrous, cyclophosphamide hydrate, cyclophosphamide monohydrate, cytoxan (lyophilized), cytoxan, endoxana, lyophilized cytoxan, neosar, nsc-26271, temozolomide, m&b-39831, ccrg-81045, m&b 39831, m-39831, nsc-362856, sch 52365, sch-52365, temodal, temomedac, temodar, ifosfamide, ifsofamide, ifex, mitoxana, mjf 9325, mjf-9325, nsc-109724, z-4942, z4942, s…	1	NCT01946529	Phase 2	Phase 2	Compound id 51794 - CYCLOPHOSPHAMIDE,Compound id 27258 - TEMOZOLOMIDE,Compound id 30136 - IFOSFAMIDE,Compound id 429624 - SORAFENIB,Compound id 791569 - DOXORUBICIN,Compound id 866156 - ETOPOSIDE,Compound id 986271 - VINCRISTINE,Compound id 1039526 - TEMSIROLIMUS,Compound id 2689088 - BEVACIZUMAB
Phase II Evaluating Efficacy of Temsirolimus in 2 Line Therapy for Patients With Advanced Bladder Cancer	ATC Class - L01X - Other antineoplastic agents in atc	Relapsed Bladder Cancer		2016-12-01	2009-06-01	Temsirolimus	temsirolimus, cci-779, torisel	1	NCT01827943	Phase 2	Phase 2	Compound id 1039526 - TEMSIROLIMUS
CCI-779 and Rituximab in Treating Patients With Relapsed or Refractory Non-Hodgkin's Lymphoma	ATC Class - L01X - Other antineoplastic agents in atc	Recurrent Mantle Cell Lymphoma		2012-03-01	2005-05-01	rituximab, temsirolimus	temsirolimus, cci-779, torisel, rituximab, abp-798, abp798, ct-p10, hs-006, hs-006 (rituximab biosimilar), hs006, idec-102, idec-c2b8, mabthera, mabthera rituxan, r-105 idec-102, rg-105, rhcacd20ma, rituximab (genetical recombination), rituxan, sait-101, sait101, usp mab 001, monoclonal igg1, truxima, rituximab-abbs	1	NCT00109967	Phase 2	Phase 2	Compound id 1039526 - TEMSIROLIMUS,Compound id 2689081 - RITUXIMAB
Combination Chemotherapy and Bevacizumab With the NovoTTF-100L(P) System in Treating Participants With Advanced, Recurrent, or Refractory Hepatic Metastatic Cancer	ATC Class - L01X - Other antineoplastic agents in atc,ATC Class - L01D - Cytotoxic antibiotics and related substances,ATC Class - L01B - Antimetabolites,ATC Class - J07B - Viral vaccines	Advanced Malignant Neoplasm, Colorectal Carcinoma Metastatic in the Liver, Metastatic Malignant Neoplasm in the Liver, Refractory Malignant Neoplasm		2021-12-01	2020-06-01	Bevacizumab, Fluorouracil, Leucovorin, Oxaliplatin, Pegylated Liposomal Doxorubicin Hydrochloride, Temsirolimus, Tumor Treating Fields Therapy	fluorouracil, 5-fu, 5-fluorouracil, 5 fu, 5.f.u., accusite, actikerall, adrucil, carac, efudix, efudex, fluoro-uracil roche, fluracil, fluoroplex, nsc-19893, ro 2-9757, ro-2-9757, ro-29757, tolak, leucovorin, doxorubicin, doxil, rubex, adriamycin, hydroxydaunorubicin, adriblastina, epirubicin hydrochloride impurity, doxorubicin-, nsc-123127, valrubicin impurity, doxorubicin, doxorubicin hydrochlo…	1	NCT03203525	Phase 1	Phase 1	Compound id 23643 - FLUOROURACIL,Compound id 570936 - LEUCOVORIN,Compound id 791569 - DOXORUBICIN,Compound id 826096 - DOXORUBICIN HYDROCHLORIDE,Compound id 1039526 - TEMSIROLIMUS,Compound id 2689088 - BEVACIZUMAB,Compound id 2805075 - OXALIPLATIN
Temsirolimus in Treating Patients With Metastatic Neuroendocrine Carcinoma	ATC Class - L01X - Other antineoplastic agents in atc	Metastatic Gastrointestinal Carcinoid Tumor, Pulmonary Carcinoid Tumor, Recurrent Gastrointestinal Carcinoid Tumor, Recurrent Islet Cell Carcinoma		2011-04-01	2003-12-01	laboratory biomarker analysis, temsirolimus	temsirolimus, cci-779, torisel	1	NCT00093782	Phase 2	Phase 2	Compound id 1039526 - TEMSIROLIMUS
Temsirolimus + Weekly Paclitaxel + Carboplatin for Recurrent or Metastatic Head and Neck Squamous Cell Cancer (HNSCC)	ATC Class - L01X - Other antineoplastic agents in atc,ATC Class - L01C - Plant alkaloids and other natural products, antineoplastic drugs	Head and Neck Cancer, Squamous Cell Cancer		2018-06-01	2009-11-01	Temsirolimus + Weekly Paclitaxel + Carboplatin	paclitaxel, abi-007, abi-007 component paclitaxel, abraxane, bms 181339-01, bms-181339-01, dhp 107, dhp-107, mbt 0206, mbt-0206, nk 105, nk-105, nsc-125973, pacitaxel, paxene, qw-8184, taxol, taxol 100, temsirolimus, cci-779, torisel, carboplatin, paraplatin, carboplatine, jm-8, nsc-201345, nsc-241240	1	NCT01016769	Phase 1	Phase 1	Compound id 991478 - PACLITAXEL,Compound id 1039526 - TEMSIROLIMUS,Compound id 2702494 - CARBOPLATIN
Metronomic Therapy for Pediatric Patients With Solid Tumors at High Risk of Recurrence	ATC Class - N03A - Antiepileptics,ATC Class - L01A - Alkylating agents,ATC Class - L01X - Other antineoplastic agents in atc,ATC Class - J07B - Viral vaccines	Solid Tumor		2029-07-01	2014-07-01	Bevacizumab, Cyclophosphamide, Temsirolimus, Valproic Acid	cyclophosphamide, b-518, cyclophosphamide anhydrous, cyclophosphamide hydrate, cyclophosphamide monohydrate, cytoxan (lyophilized), cytoxan, endoxana, lyophilized cytoxan, neosar, nsc-26271, valproic acid, 44089, convulex, depakote, depakene, nsc-93819, stavzor, valproic, temsirolimus, cci-779, torisel, bevacizumab, 12-igg1, ava-1, avastin, bevacizumab beta, bi 695502, bs-503a, chs-5217, ct-16, c…	1	NCT02446431	Early Phase 1	Early Phase 1	Compound id 51794 - CYCLOPHOSPHAMIDE,Compound id 45378 - VALPROIC ACID,Compound id 1039526 - TEMSIROLIMUS,Compound id 2689088 - BEVACIZUMAB
CCI-779 in Treating Patients With Stage IIIB (With Pleural Effusion) or Stage IV Non-Small Cell Lung Cancer	ATC Class - L01X - Other antineoplastic agents in atc	Recurrent Non-small Cell Lung Cancer, Stage IIIB Non-small Cell Lung Cancer, Stage IV Non-small Cell Lung Cancer		null	2004-02-01	laboratory biomarker analysis, temsirolimus	temsirolimus, cci-779, torisel	1	NCT00079235	Phase 2	Phase 2	Compound id 1039526 - TEMSIROLIMUS
S0718 Pazopanib and Temsirolimus in Treating Patients With Advanced Solid Tumors	ATC Class - L01X - Other antineoplastic agents in atc	Unspecified Adult Solid Tumor, Protocol Specific		null	null	immunoenzyme technique, laboratory biomarker analysis, pazopanib hydrochloride, pharmacological study, temsirolimus	pazopanib, gw786034, votrient, pazopanib hydrochloride, gw-786034b, gw786034b, temsirolimus, cci-779, torisel	1	NCT00788580	Phase 1	Phase 1	Compound id 340003 - PAZOPANIB,Compound id 430375 - PAZOPANIB HYDROCHLORIDE,Compound id 1039526 - TEMSIROLIMUS
CCI-779 and Bevacizumab in Treating Patients With Metastatic or Unresectable Kidney Cancer	ATC Class - L01X - Other antineoplastic agents in atc,ATC Class - J07B - Viral vaccines	Clear Cell Renal Cell Carcinoma, Recurrent Renal Cell Cancer, Stage IV Renal Cell Cancer		2015-09-01	2005-05-01	Bevacizumab, CCI-779	temsirolimus, cci-779, torisel, bevacizumab, 12-igg1, ava-1, avastin, bevacizumab beta, bi 695502, bs-503a, chs-5217, ct-16, ct-p16, ct-p16 (biosimilar of bevacizumab), fkb-238, hlx-04, hlx04, ibi305, pf-06439535, r-435, rg-435, rhumab-, rhumab-vegf, usp mab 002, monoclonal igg1	1	NCT00112840	Phase 1	Phase 1	Compound id 1039526 - TEMSIROLIMUS,Compound id 2689088 - BEVACIZUMAB
Temsirolimus With or Without Cetuximab in Patients With Recurrent and/or Metastatic Head and Neck Cancer Who Did Not Respond to Previous Therapy	ATC Class - L01X - Other antineoplastic agents in atc	Recurrent Hypopharyngeal Squamous Cell Carcinoma, Recurrent Laryngeal Squamous Cell Carcinoma, Recurrent Laryngeal Verrucous Carcinoma, Recurrent Lip and Oral Cavity Squamous Cell Carcinoma, Recurrent Metastatic Squamous Cell Carcinoma in the Neck With Occult Primary, Recurrent Nasal Cavity and Paranasal Sinus Squamous Cell Carcinoma, Recurrent Nasopharyngeal Keratinizing Squamous Cell Carcinoma,…		2013-12-01	2010-11-01	Cetuximab, Laboratory Biomarker Analysis, Temsirolimus	temsirolimus, cci-779, torisel, cetuximab, abp-494, c-225, c225, cetuximab (genetical recombination), cmab-009, cmab009, erbitux, imc-225, imc-c225, moab c225	1	NCT01256385	Phase 2	Phase 2	Compound id 1039526 - TEMSIROLIMUS,Compound id 2689082 - CETUXIMAB
Temsirolimus and Bryostatin 1 in Treating Patients With Unresectable or Metastatic Solid Tumors	ATC Class - L01X - Other antineoplastic agents in atc	Recurrent Melanoma, Recurrent Renal Cell Cancer, Stage IV Melanoma, Stage IV Renal Cell Cancer, Unspecified Adult Solid Tumor, Protocol Specific		null	2005-03-01	bryostatin 1, temsirolimus	bryostatin, bryostatin 1, temsirolimus, cci-779, torisel	1	NCT00112476	Phase 1	Phase 1	Compound id 996175 - BRYOSTATIN,Compound id 1039526 - TEMSIROLIMUS
Temsirolimus in Treating Patients With Recurrent or Persistent Cancer of the Uterus	ATC Class - L01X - Other antineoplastic agents in atc	Recurrent Uterine Sarcoma, Uterine Carcinosarcoma		2012-10-01	2010-01-01	temsirolimus	temsirolimus, cci-779, torisel	1	NCT01061606	Phase 2	Phase 2	Compound id 1039526 - TEMSIROLIMUS
Phase II Combination of Temsirolimus and Sorafenib in Advanced Hepatocellular Carcinoma	ATC Class - L01X - Other antineoplastic agents in atc	Hepatocellular Carcinoma		2020-01-01	2012-10-01	Sorafenib:, Temsirolimus	sorafenib, bay 43-9006, bay-43-9006, nexavar, temsirolimus, cci-779, torisel	1	NCT01687673	Phase 2	Phase 2	Compound id 429624 - SORAFENIB,Compound id 1039526 - TEMSIROLIMUS
CCI-779 in Treating Patients With Mantle Cell Non-Hodgkin's Lymphoma	ATC Class - L01X - Other antineoplastic agents in atc	Recurrent Mantle Cell Lymphoma		2008-02-01	2002-04-01	temsirolimus	temsirolimus, cci-779, torisel	1	NCT00033267	Phase 2	Phase 2	Compound id 1039526 - TEMSIROLIMUS
Temsirolimus With or Without Megestrol Acetate and Tamoxifen Citrate in Treating Patients With Advanced, Persistent, or Recurrent Endometrial Cancer	ATC Class - G03D - Progestogen sex hormones and modulators of the genital system,ATC Class - L02A - Hormones and related agents,ATC Class - G03A - Hormonal contraceptives for systemic use,ATC Class - L01X - Other antineoplastic agents in atc,ATC Class - L02B - Hormone antagonists and related agents	Endometrial Carcinoma, Recurrent Uterine Corpus Carcinoma, Stage IIIA Uterine Corpus Cancer, Stage IIIB Uterine Corpus Cancer, Stage IIIC1 Uterine Corpus Cancer, Stage IIIC2 Uterine Corpus Cancer, Stage IVA Uterine Corpus Cancer, Stage IVB Uterine Corpus Cancer		2017-02-01	2008-09-01	Laboratory Biomarker Analysis, Megestrol Acetate, Tamoxifen Citrate, Temsirolimus	tamoxifen citrate, kessar, zynoplex, emblon, fentamox 10, fentamox 20, i.c.i.46474 citrate, ici 46,474, ici-46474, kentadex, kessar 10, kessar 20, noltam, nolvadex d, nolvadex fte, nolvadex, oestrifen-10, oestrifen-20, oestrifen-40, soltamox, tamofen, temsirolimus, cci-779, torisel, tamoxifen, ici-47699, megestrol acetate, ovaban, 5071, bdh 1298, bdh-1298, megace es, megestrol, megace, nsc-71423,…	1	NCT00729586	Phase 2	Phase 2	Compound id 837927 - TAMOXIFEN CITRATE,Compound id 1039526 - TEMSIROLIMUS,Compound id 1899733 - TAMOXIFEN,Compound id 1918920 - MEGESTROL ACETATE
Phase II Study of Alternating Sunitinib and Temsirolimus	ATC Class - L01X - Other antineoplastic agents in atc	Metastatic Renal Cell Carcinoma		2021-12-01	2010-06-01	Sunitinib, Temsirolimus	sunitinib, sutent, su-011248, su-11248, su011248, temsirolimus, cci-779, torisel	1	NCT01517243	Phase 2	Phase 2	Compound id 154683 - SUNITINIB,Compound id 1039526 - TEMSIROLIMUS
Hormone Therapy and Temsirolimus in Treating Patients With Relapsed Prostate Cancer	ATC Class - L02B - Hormone antagonists and related agents,ATC Class - L01X - Other antineoplastic agents in atc,ATC Class - L02A - Hormones and related agents	Adenocarcinoma of the Prostate, Recurrent Prostate Cancer		null	2007-09-01	bicalutamide, flutamide, goserelin acetate, laboratory biomarker analysis, leuprolide acetate, nilutamide, temsirolimus	bicalutamide, cosudex, calutide, kalumid, casodex, ici 176,334, ici-176334, ici176,334-1, leuprolide, abbott-43818 free base, ckd-841, leuprorelin, nsc-377526, tap-144 free base, leuprolide acetate, carcinil, lupron depot ped, a-43818, abbott-43818, eligard, eligard kit, fensolvi kit, leuprolide monoacetate, leuprorelin acetate, lupron depot, lupron depot-ped, lupron depot-ped kit, lutrate depot …	1	NCT00512668	Phase 1	Phase 1	Compound id 141656 - BICALUTAMIDE,Compound id 1010374 - LEUPROLIDE,Compound id 1013131 - LEUPROLIDE ACETATE,Compound id 1013133 - GOSERELIN,Compound id 1015035 - GOSERELIN ACETATE,Compound id 1039526 - TEMSIROLIMUS,Compound id 1121984 - FLUTAMIDE,Compound id 1335920 - NILUTAMIDE
Cixutumumab and Temsirolimus in Treating Patients With Metastatic Prostate Cancer	ATC Class - L01X - Other antineoplastic agents in atc,ATC Class - S01J - Diagnostic agents, ophthamologic	Hormone-Resistant Prostate Cancer, Prostate Adenocarcinoma, Recurrent Prostate Carcinoma, Stage IV Prostate Cancer		2013-02-01	2009-10-01	Cixutumumab, Diagnostic Laboratory Biomarker Analysis, Temsirolimus	temsirolimus, cci-779, torisel, cixutumumab, imc-a12, nsc-742460	1	NCT01026623	Phase 1	Phase 1	Compound id 1039526 - TEMSIROLIMUS,Compound id 2728603 - CIXUTUMUMAB
Erlotinib and Temsirolimus for Solid Tumors	ATC Class - L01X - Other antineoplastic agents in atc	Solid Tumors		2014-09-01	2009-05-01	Erlotinib, Temsirolimus	erlotinib, osi-774, ro-508231, cp-358,774, cp-358774, cp-35877401, r-1415, rg-1415, tarceva, temsirolimus, cci-779, torisel	1	NCT00770263	Phase 1	Phase 1	Compound id 141944 - ERLOTINIB,Compound id 1039526 - TEMSIROLIMUS
Neratinib With and Without Temsirolimus for Patients With HER2 Activating Mutations in Non-Small Cell Lung Cancer	ATC Class - L01X - Other antineoplastic agents in atc	HER2-mutant Non-Small Cell Lung Cancer		2017-10-01	2013-07-01	neratinib, temsirolimus	neratinib, cdp-820, hki-272, way-179272, temsirolimus, cci-779, torisel	1	NCT01827267	Phase 2	Phase 2	Compound id 820443 - NERATINIB,Compound id 1039526 - TEMSIROLIMUS
Temsirolimus in Recurrent Primary Central Nervous System (CNS) Lymphoma	ATC Class - L01X - Other antineoplastic agents in atc	Recurrent or Refractory Primary CNS Lymphoma		2014-06-01	2009-07-01	temsirolimus	temsirolimus, cci-779, torisel	1	NCT00942747	Phase 2	Phase 2	Compound id 1039526 - TEMSIROLIMUS
A Phase II Study of Sunitinib or Temsirolimus in Patients With Advanced Rare Tumours	ATC Class - L01X - Other antineoplastic agents in atc	Advanced Rare Tumours		2021-12-01	2011-07-01	Sunitinib, Temsirolimus	sunitinib, sutent, su-011248, su-11248, su011248, temsirolimus, cci-779, torisel	1	NCT01396408	Phase 2	Phase 2	Compound id 154683 - SUNITINIB,Compound id 1039526 - TEMSIROLIMUS
Lenalidomide and Temsirolimus in Treating Patients With Previously Treated Multiple Myeloma	ATC Class - L01X - Other antineoplastic agents in atc,ATC Class - L04A - Immunosuppressants	Refractory Multiple Myeloma, Stage II Multiple Myeloma, Stage III Multiple Myeloma		null	2007-03-01	laboratory biomarker analysis, lenalidomide, pharmacological study, temsirolimus	temsirolimus, cci-779, torisel, lenalidomide, cc-5013, cdc-501, revlimid, syp-1512	1	NCT00398515	Phase 1	Phase 1	Compound id 1039526 - TEMSIROLIMUS,Compound id 1113909 - LENALIDOMIDE
Study of Temsirolimus, Erlotinib and Cisplatin in Solid Tumors	ATC Class - L01X - Other antineoplastic agents in atc,ATC Class - B02B - Vitamin k and other hemostatics	Triple Negative Breast Cancer		2012-10-01	2009-09-01	Cisplatin, Erlotinib, Temsirolimus	erlotinib, osi-774, ro-508231, cp-358,774, cp-358774, cp-35877401, r-1415, rg-1415, tarceva, temsirolimus, cci-779, torisel, cisplatin, cisplatinum, cis-diamminedichloroplatinum(ii), cis-ddp, cis-platinum ii, int-230-6 component cisplatin, int230-6 component cisplatin, liplacis, nsc-119875, platinol-aq, platinol	1	NCT00998036	Phase 1	Phase 1	Compound id 141944 - ERLOTINIB,Compound id 1039526 - TEMSIROLIMUS,Compound id 2685970 - CISPLATIN
Perifosine With Temsirolimus for Recurrent Pediatric Solid Tumors	ATC Class - L01X - Other antineoplastic agents in atc	Pediatric Solid Tumors		2017-03-01	2010-01-01	perifosine + temsirolimus	perifosine, krx-0401, nsc-639966, temsirolimus, cci-779, torisel	1	NCT01049841	Phase 1	Phase 1	Compound id 336354 - PERIFOSINE,Compound id 1039526 - TEMSIROLIMUS
Sorafenib With Either Temsirolimus or Tipifarnib in Treating Patients With Stage IV Malignant Melanoma That Cannot Be Removed By Surgery	ATC Class - L01X - Other antineoplastic agents in atc	Recurrent Melanoma, Stage IV Melanoma		2011-01-01	2007-08-01	sorafenib tosylate, temsirolimus, tipifarnib	sorafenib, bay 43-9006, bay-43-9006, nexavar, tipifarnib, r-11577, r-115777, r115777, sorafenib tosylate, bay 54-9085, bay-54-9085, sorafenib tosilate, temsirolimus, cci-779, torisel	1	NCT00281957	Phase 2	Phase 2	Compound id 429624 - SORAFENIB,Compound id 564273 - TIPIFARNIB,Compound id 885050 - SORAFENIB TOSYLATE,Compound id 1039526 - TEMSIROLIMUS
Selumetinib With or Without Temsirolimus in Treating Patients With Metastatic, Recurrent, or Locally Advanced Soft Tissue Sarcoma That Cannot Be Removed By Surgery	ATC Class - L01X - Other antineoplastic agents in atc	Recurrent Adult Soft Tissue Sarcoma, Stage III Adult Soft Tissue Sarcoma, Stage IV Adult Soft Tissue Sarcoma		2015-04-01	2010-10-01	Laboratory Biomarker Analysis, Selumetinib, Temsirolimus	temsirolimus, cci-779, torisel, selumetinib, arry-142886, arry-886, azd-6244, azd6244, koselugo	1	NCT01206140	Phase 2	Phase 2	Compound id 1039526 - TEMSIROLIMUS,Compound id 1897397 - SELUMETINIB
Study of Axitinib and Temsirolimus in Solid Tumors	ATC Class - L01X - Other antineoplastic agents in atc	Cancer		2014-03-01	2011-10-01	Axitinib, Temsirolimus	temsirolimus, cci-779, torisel, axitinib, ag-013736, ag-13736, inlyta	1	NCT01529138	Phase 1	Phase 1	Compound id 1039526 - TEMSIROLIMUS,Compound id 1927385 - AXITINIB
Rituximab, Cladribine, and Temsirolimus in Treating Patients With Newly Diagnosed Mantle Cell Lymphoma	ATC Class - L01B - Antimetabolites,ATC Class - L04A - Immunosuppressants,ATC Class - L01X - Other antineoplastic agents in atc,ATC Class - L03A - Interferon	Lymphoma		2017-06-01	2009-04-01	Filgrastim, Pegfilgrastim, cladribine, rituximab, temsirolimus	temsirolimus, cci-779, torisel, cladribine, leustatin, cladaribine, leustat, litak, mavenclad, nsc-05014, nsc-105014, nsc-105014-f, rwj 26251, rwj-26251, filgrastim, accofil, filgrastim for bioassay, filgrastim-sndz, granulocyte colony-stimulating factor filgrastim, krn-8601, mbri-9901, neupogen 30, neupogen 48, nivestim, neupogen, r-methug-csf, tbo-filgrastim, tx-01, tx01, xm-02, xm02, zarzio, p…	1	NCT00787969	Phase 1	Phase 1	Compound id 1039526 - TEMSIROLIMUS,Compound id 1133451 - CLADRIBINE,Compound id 2689072 - FILGRASTIM,Compound id 2689073 - PEGFILGRASTIM,Compound id 2689081 - RITUXIMAB
Temsirolimus and Irinotecan for Treatment Resistant Patients With Metastatic Colorectal Cancer and KRAS Mutations	ATC Class - L01X - Other antineoplastic agents in atc	Metastatic Colorectal Cancer		2011-06-01	2009-03-01	Irinotecan, Temsirolimus	irinotecan, camptosar, temsirolimus, cci-779, torisel	1	NCT00827684	Phase 2	Phase 2	Compound id 881410 - IRINOTECAN,Compound id 1039526 - TEMSIROLIMUS
Vorinostat and Temsirolimus With or Without Radiation Therapy in Treating Younger Patients With Newly Diagnosed or Progressive Diffuse Intrinsic Pontine Glioma	ATC Class - L01X - Other antineoplastic agents in atc	Diffuse Intrinsic Pontine Glioma		2020-10-01	2015-10-01	Laboratory Biomarker Analysis, Radiation Therapy, Temsirolimus, Vorinostat	temsirolimus, cci-779, torisel, vorinostat, mk-0683, mk0683, zolinza	1	NCT02420613	Phase 1	Phase 1	Compound id 1039526 - TEMSIROLIMUS,Compound id 1113023 - VORINOSTAT
Erlotinib and Temsirolimus in Treating Patients With Recurrent Malignant Glioma	ATC Class - L01X - Other antineoplastic agents in atc	Adult Anaplastic Astrocytoma, Adult Anaplastic Oligodendroglioma, Adult Diffuse Astrocytoma, Adult Giant Cell Glioblastoma, Adult Glioblastoma, Adult Gliosarcoma, Adult Mixed Glioma, Adult Pilocytic Astrocytoma, Adult Pineal Gland Astrocytoma, Adult Subependymal Giant Cell Astrocytoma, Recurrent Adult Brain Tumor		2014-04-01	2005-04-01	erlotinib, laboratory biomarker analysis, pharmacological study, temsirolimus, therapeutic conventional surgery	erlotinib, osi-774, ro-508231, cp-358,774, cp-358774, cp-35877401, r-1415, rg-1415, tarceva, temsirolimus, cci-779, torisel	1	NCT00112736	Phase 1	Phase 1	Compound id 141944 - ERLOTINIB,Compound id 1039526 - TEMSIROLIMUS
Study Evaluating Biomarkers In Relapsed/Refractory Pediatric Solid Tumors	ATC Class - L01X - Other antineoplastic agents in atc	Adenocarcinoma, Neoplasms		2012-01-01	2005-03-01	Torisel	temsirolimus, cci-779, torisel	1	NCT00106353	Phase 1	Phase 1	Compound id 1039526 - TEMSIROLIMUS
Temsirolimus in Treating Patients With Cervical Cancer That Is Recurrent, Locally Advanced, Metastatic, or Cannot Be Removed By Surgery	ATC Class - L01X - Other antineoplastic agents in atc	Cervical Adenocarcinoma, Cervical Adenosquamous Carcinoma, Cervical Squamous Cell Carcinoma, Recurrent Cervical Carcinoma, Stage IIIA Cervical Cancer, Stage IIIB Cervical Cancer, Stage IVA Cervical Cancer, Stage IVB Cervical Cancer		2012-11-01	2009-12-01	Laboratory Biomarker Analysis, Temsirolimus	temsirolimus, cci-779, torisel	1	NCT01026792	Phase 2	Phase 2	Compound id 1039526 - TEMSIROLIMUS
Temsirolimus in Treating Patients With Refractory or Recurrent Ovarian Epithelial, Fallopian Tube, or Primary Peritoneal Cancer	ATC Class - L01X - Other antineoplastic agents in atc	Fallopian Tube Cancer, Primary Peritoneal Cavity Cancer, Recurrent Ovarian Epithelial Cancer		2012-01-01	2007-02-01	temsirolimus	temsirolimus, cci-779, torisel	1	NCT00429793	Phase 2	Phase 2	Compound id 1039526 - TEMSIROLIMUS
Study in Non-Clear Cell Renal Carcinoma (Ncc-RCC) Temsirolimus Versus Sunitinib	ATC Class - L01X - Other antineoplastic agents in atc	Non-clear Cell Renal Cell Cancer		null	2009-07-01	Sunitinib, Temsirolimus	sunitinib, sutent, su-011248, su-11248, su011248, temsirolimus, cci-779, torisel	1	NCT00979966	Phase 2	Phase 2	Compound id 154683 - SUNITINIB,Compound id 1039526 - TEMSIROLIMUS
POEM STUDY: A Phase IIa Trial in Endometrial Carcinoma With Temsirolimus	ATC Class - L01X - Other antineoplastic agents in atc	Carcinoma, Endometrioid, mTOR Protein		2014-03-01	2012-05-01	Temsirolimus	temsirolimus, cci-779, torisel	1	NCT02093598	Phase 2	Phase 2	Compound id 1039526 - TEMSIROLIMUS
Temsirolimus, Irinotecan Hydrochloride, and Temozolomide in Treating Younger Patients With Relapsed or Refractory Solid Tumors	ATC Class - L01X - Other antineoplastic agents in atc,ATC Class - L01A - Alkylating agents,ATC Class - J07B - Viral vaccines	Unspecified Childhood Solid Tumor, Protocol Specific		null	2010-06-01	irinotecan hydrochloride, laboratory biomarker analysis, temozolomide, temsirolimus	temozolomide, m&b-39831, ccrg-81045, m&b 39831, m-39831, nsc-362856, sch 52365, sch-52365, temodal, temomedac, temodar, irinotecan, camptosar, irinotecan hydrochloride, campto, cpt-11, dq-2805, irinotecan hydrochloride anhydrous, irinotecan hydrochloride hydrate, irinotecan hydrochloride trihydrate, irinotecan monohydrochloride trihydrate, onivyde, u-101,440e, u-101440e, temsirolimus, cci-779, to…	1	NCT01141244	Phase 1	Phase 1	Compound id 27258 - TEMOZOLOMIDE,Compound id 881410 - IRINOTECAN,Compound id 926244 - IRINOTECAN HYDROCHLORIDE,Compound id 1039526 - TEMSIROLIMUS
Avastin and Temsirolimus Following Tyrosine Kinase Inhibitor Failure in Patients With Advanced Renal Cell Carcinoma	ATC Class - L01X - Other antineoplastic agents in atc,ATC Class - J07B - Viral vaccines	Kidney Cancer, Renal Cell Carcinoma		2015-05-01	2009-04-01	bevacizumab, temsirolimus	temsirolimus, cci-779, torisel, bevacizumab, 12-igg1, ava-1, avastin, bevacizumab beta, bi 695502, bs-503a, chs-5217, ct-16, ct-p16, ct-p16 (biosimilar of bevacizumab), fkb-238, hlx-04, hlx04, ibi305, pf-06439535, r-435, rg-435, rhumab-, rhumab-vegf, usp mab 002, monoclonal igg1	1	NCT00782275	Phase 2	Phase 2	Compound id 1039526 - TEMSIROLIMUS,Compound id 2689088 - BEVACIZUMAB
Temsirolimus and Bevacizumab in Treating Patients With Advanced Endometrial, Ovarian, Liver, Carcinoid, or Islet Cell Cancer	ATC Class - L01X - Other antineoplastic agents in atc,ATC Class - J07B - Viral vaccines	Adult Hepatocellular Carcinoma, Advanced Adult Hepatocellular Carcinoma, Endometrial Serous Adenocarcinoma, Localized Non-Resectable Adult Liver Carcinoma, Lung Carcinoid Tumor, Malignant Pancreatic Gastrinoma, Malignant Pancreatic Glucagonoma, Malignant Pancreatic Insulinoma, Malignant Pancreatic Somatostatinoma, Metastatic Digestive System Neuroendocrine Tumor G1, Ovarian Carcinosarcoma, Ovaria…		2017-03-01	2009-09-01	Bevacizumab, Temsirolimus	temsirolimus, cci-779, torisel, bevacizumab, 12-igg1, ava-1, avastin, bevacizumab beta, bi 695502, bs-503a, chs-5217, ct-16, ct-p16, ct-p16 (biosimilar of bevacizumab), fkb-238, hlx-04, hlx04, ibi305, pf-06439535, r-435, rg-435, rhumab-, rhumab-vegf, usp mab 002, monoclonal igg1	1	NCT01010126	Phase 2	Phase 2	Compound id 1039526 - TEMSIROLIMUS,Compound id 2689088 - BEVACIZUMAB
Sorafenib and Temsirolimus in Treating Patients With Metastatic, Recurrent, or Unresectable Melanoma	ATC Class - L01X - Other antineoplastic agents in atc	Melanoma, Recurrent Melanoma, Stage III Melanoma, Stage IV Melanoma		2012-02-01	2006-04-01	sorafenib tosylate, temsirolimus	sorafenib, bay 43-9006, bay-43-9006, nexavar, sorafenib tosylate, bay 54-9085, bay-54-9085, sorafenib tosilate, temsirolimus, cci-779, torisel	1	NCT01851408	Phase 2	Phase 2	Compound id 429624 - SORAFENIB,Compound id 885050 - SORAFENIB TOSYLATE,Compound id 1039526 - TEMSIROLIMUS
Temsirolimus (CCI-770, Torisel) Combined With Cetuximab in Cetuximab-Refractory Colorectal Cancer	ATC Class - L01X - Other antineoplastic agents in atc	Colorectal Adenocarcinoma, Colorectal Cancer		2010-10-01	2007-10-01	Cetuximab, Temsirolimus	temsirolimus, cci-779, torisel, cetuximab, abp-494, c-225, c225, cetuximab (genetical recombination), cmab-009, cmab009, erbitux, imc-225, imc-c225, moab c225	1	NCT00593060	Phase 1	Phase 1	Compound id 1039526 - TEMSIROLIMUS,Compound id 2689082 - CETUXIMAB
Bortezomib, Rituximab, and Dexamethasone With or Without Temsirolimus in Treating Patients With Untreated or Relapsed Waldenstrom Macroglobulinemia or Relapsed or Refractory Mantle Cell or Follicular Lymphoma	ATC Class - R01A - Decongestants and other nasal preparations for topical use,ATC Class - A01A - Stomatological preparations,ATC Class - S01B - Antiinflammatory agents, ophthalmologic,ATC Class - S03B - Corticosteroid ophthalmologic and otologic preparations,ATC Class - D07A - Corticosteroid dermatological preparations, plain,ATC Class - D10A - Anti-acne preparations for topical use,ATC Class - C…	Recurrent Follicular Lymphoma, Recurrent Mantle Cell Lymphoma, Recurrent Marginal Zone Lymphoma, Recurrent Non-Hodgkin Lymphoma, Recurrent Small Lymphocytic Lymphoma, Recurrent Waldenstrom Macroglobulinemia, Refractory Follicular Lymphoma, Refractory Mantle Cell Lymphoma, Refractory Marginal Zone Lymphoma, Refractory Non-Hodgkin Lymphoma, Refractory Small Lymphocytic Lymphoma		2021-09-01	2011-07-01	Bortezomib, Dexamethasone, Laboratory Biomarker Analysis, Quality-of-Life Assessment, Rituximab, Temsirolimus	dexamethasone, decadron-la, dexacen-4, dexacort, dexair, mymethasone, neodecadron, dalalone, kortico injection, aeroseb-dex, decaderm, decadron-75, decaspray, dexacortisyl, dexafree, dexamethasone intensol, dexamethasone metasulfobenzoate sodium, dexamethasone palmitate, dexamethasone valerate, dexone 0.5, dexone 0.75, dexone 1.5, dexone 4, dexsol, dextenza, dexycu, dexycu kit, dropodex, decadron…	1	NCT01381692	Phase 1	Phase 1	Compound id 1903831 - DEXAMETHASONE,Compound id 1039526 - TEMSIROLIMUS,Compound id 1901573 - BORTEZOMIB,Compound id 2689081 - RITUXIMAB
CCI-779 in Treating Patients With Recurrent Glioblastoma Multiforme	ATC Class - L01X - Other antineoplastic agents in atc	Adult Giant Cell Glioblastoma, Adult Glioblastoma, Adult Gliosarcoma, Recurrent Adult Brain Tumor		null	2001-05-01	laboratory biomarker analysis, pharmacological study, temsirolimus	temsirolimus, cci-779, torisel	1	NCT00016328	Phase 2	Phase 2	Compound id 1039526 - TEMSIROLIMUS
Temsirolimus and Imatinib Mesylate in Treating Patients With Chronic Myelogenous Leukemia	ATC Class - L01X - Other antineoplastic agents in atc	Accelerated Phase Chronic Myelogenous Leukemia, Blastic Phase Chronic Myelogenous Leukemia, Chronic Myelogenous Leukemia, BCR-ABL1 Positive, Chronic Phase Chronic Myelogenous Leukemia, Relapsing Chronic Myelogenous Leukemia		null	2005-04-01	imatinib mesylate, laboratory biomarker analysis, temsirolimus	imatinib, gleevec, sti-571, imatinib mesilate, imatinib mesylate, glivec, imatinib methanesulfonate, qti-571, qti571, sti 571, sti571, temsirolimus, cci-779, torisel	1	NCT00101088	Phase 1	Phase 1	Compound id 713353 - IMATINIB,Compound id 864374 - IMATINIB MESYLATE,Compound id 1039526 - TEMSIROLIMUS
Temsirolimus and Perifosine in Treating Patients With Recurrent or Progressive Malignant Glioma	ATC Class - L01X - Other antineoplastic agents in atc	Adult Anaplastic Astrocytoma, Adult Anaplastic Oligodendroglioma, Adult Diffuse Astrocytoma, Adult Giant Cell Glioblastoma, Adult Glioblastoma, Adult Gliosarcoma, Adult Mixed Glioma, Adult Oligodendroglioma, Recurrent Adult Brain Neoplasm		2020-09-01	2010-01-01	Laboratory Biomarker Analysis, Perifosine, Temsirolimus, Therapeutic Conventional Surgery	perifosine, krx-0401, nsc-639966, temsirolimus, cci-779, torisel	1	NCT01051557	Phase 1	Phase 1	Compound id 336354 - PERIFOSINE,Compound id 1039526 - TEMSIROLIMUS
Temsirolimus (ToriselÂ®) and Erlotinib (TarcevaÂ®) in Platinum-Refractory/Ineligible, Advanced, Squamous Cell Carcinoma	ATC Class - L01X - Other antineoplastic agents in atc	Squamous Cell Carcinoma		2012-12-01	2009-12-01	Erlotinib, Temsirolimus	erlotinib, osi-774, ro-508231, cp-358,774, cp-358774, cp-35877401, r-1415, rg-1415, tarceva, temsirolimus, cci-779, torisel	1	NCT01009203	Phase 2	Phase 2	Compound id 141944 - ERLOTINIB,Compound id 1039526 - TEMSIROLIMUS
Assessment of Systemically Administered Torisel Delivery to Brain Tumors by Intratumoral Microdialysis	ATC Class - L01X - Other antineoplastic agents in atc	Brain Neoplasms		2010-05-01	2009-07-01	Temsirolimus (Torisel)	temsirolimus, cci-779, torisel	1	NCT00949026	Phase 1	Phase 1	Compound id 1039526 - TEMSIROLIMUS
Study With Temsirolimus Added to Standard Chemotherapy for Patients Over 60 Years With Acute Myeloblastic Leukemia	ATC Class - A12C - Other mineral supplements in atc,ATC Class - B05C - Irrigating solutions, blood substitutes and perfusion,ATC Class - B05X - I.v. solution additives,ATC Class - L01X - Other antineoplastic agents in atc	Acute Myeloblastic Leukemia		2017-04-01	2012-05-01	sodium chloride solution 0.9%, temsirolimus	temsirolimus, cci-779, torisel	1	NCT01611116	Phase 2	Phase 2	Compound id 1039526 - TEMSIROLIMUS
Tivantinib and Temsirolimus in Treating Patients With Solid Tumors That is Metastatic or Cannot be Removed by Surgery	ATC Class - L01X - Other antineoplastic agents in atc	Adult Solid Neoplasm		2015-10-01	2012-05-01	Laboratory Biomarker Analysis, Pharmacological Study, Temsirolimus, Tivantinib	tivantinib, arq 197, arq-197, temsirolimus, cci-779, torisel	1	NCT01625156	Phase 1	Phase 1	Compound id 106506 - TIVANTINIB,Compound id 1039526 - TEMSIROLIMUS
Study of Nelfinavir and Temsirolimus in Patients With Advanced Cancers	ATC Class - L01X - Other antineoplastic agents in atc,ATC Class - J05A - Direct acting antivirals	Cancer, Renal Cell Cancer		2011-08-01	2009-06-01	Nelfinavir and temsirolimus	nelfinavir, viracept, temsirolimus, cci-779, torisel	1	NCT01079286	Phase 1	Phase 1	Compound id 811881 - NELFINAVIR,Compound id 1039526 - TEMSIROLIMUS
A Trial of Temsirolimus With Etoposide and Cyclophosphamide in Children With Relapsed Acute Lymphoblastic Leukemia and Non-Hodgkins Lymphoma	ATC Class - A07A - Intestinal antiinfectives,ATC Class - D01A - Antifungals for topical use,ATC Class - G01A - Antiinfectives and antiseptics, excl. combinations with corticosteroids,ATC Class - D07X - Corticosteroids, other combinations,ATC Class - S01B - Antiinflammatory agents, ophthalmologic,ATC Class - S02B - Corticosteroid otologicals,ATC Class - S01C - Antiinflammatory agents and antiinfec…	Lymphoblastic Leukemia, Acute, Childhood, Lymphoblastic Lymphoma, Peripheral T-cell Lymphoma		2020-05-01	2015-03-01	Cyclophosphamide, Cytarabine, Etoposide, Etoposide, Hydrocortisone, Methotrexate, Temsirolimus	cyclophosphamide, b-518, cyclophosphamide anhydrous, cyclophosphamide hydrate, cyclophosphamide monohydrate, cytoxan (lyophilized), cytoxan, endoxana, lyophilized cytoxan, neosar, nsc-26271, cytarabine, tarabine pfs, alexan, alexan 100, ara-cytidine, arabinosyl cytosine, cytosar, cytosar-u, depocyte, depocyt, nsc-287459, u-19,920, u-19920, methotrexate, abitrexate, folex, mexate, mexate-aq, trexa…	1	NCT01614197	Phase 1	Phase 1	Compound id 51794 - CYCLOPHOSPHAMIDE,Compound id 95279 - CYTARABINE,Compound id 490791 - METHOTREXATE,Compound id 866156 - ETOPOSIDE,Compound id 1039526 - TEMSIROLIMUS,Compound id 1721036 - HYDROCORTISONE
Bevacizumab, Sorafenib Tosylate, and Temsirolimus in Treating Patients With Metastatic Kidney Cancer	ATC Class - L01X - Other antineoplastic agents in atc,ATC Class - J07B - Viral vaccines	Clear Cell Renal Cell Carcinoma, Recurrent Renal Cell Carcinoma, Stage IV Renal Cell Cancer AJCC v7		2017-03-01	2007-09-01	Bevacizumab, Laboratory Biomarker Analysis, Pharmacological Study, Sorafenib Tosylate, Temsirolimus	sorafenib, bay 43-9006, bay-43-9006, nexavar, sorafenib tosylate, bay 54-9085, bay-54-9085, sorafenib tosilate, temsirolimus, cci-779, torisel, bevacizumab, 12-igg1, ava-1, avastin, bevacizumab beta, bi 695502, bs-503a, chs-5217, ct-16, ct-p16, ct-p16 (biosimilar of bevacizumab), fkb-238, hlx-04, hlx04, ibi305, pf-06439535, r-435, rg-435, rhumab-, rhumab-vegf, usp mab 002, monoclonal igg1	1	NCT00378703	Phase 2	Phase 2	Compound id 429624 - SORAFENIB,Compound id 885050 - SORAFENIB TOSYLATE,Compound id 1039526 - TEMSIROLIMUS,Compound id 2689088 - BEVACIZUMAB
Combination Trial of Pimasertib (MSC1936369B) With Temsirolimus	ATC Class - L01X - Other antineoplastic agents in atc	Advanced Solid Tumor		2012-02-01	2011-05-01	Pimasertib, Pimasertib, Temsirolimus, Temsirolimus	temsirolimus, cci-779, torisel, pimasertib, as 703026, as-703026, as703026, emd 1036239, emd-1036239, g-02443714, msc-1936369a, msc-1936369b, msc1936369a, msc1936369a; as703026; emd 1036239	1	NCT01378377	Phase 1	Phase 1	Compound id 1039526 - TEMSIROLIMUS,Compound id 1447692 - PIMASERTIB
Temsirolimus Adventitial Delivery to Improve ANGioplasty and/or Atherectomy Revascularization Outcomes Below the Knee	ATC Class - L01X - Other antineoplastic agents in atc	Critical Limb Ischemia, Peripheral Artery Disease		2025-12-01	2020-12-01	Saline placebo, Temsirolimus	temsirolimus, cci-779, torisel	1	NCT04433572	Phase 3	Phase 3	Compound id 1039526 - TEMSIROLIMUS
Bendamustine and Temsirolimus in Patients With Relapsed or Refractory Mantle Cell Non-Hodgkin's Lymphoma (NHL)	ATC Class - L01X - Other antineoplastic agents in atc,ATC Class - L01A - Alkylating agents	Mantle Cell Lymphoma		2014-04-01	2010-05-01	Bendamustine, Temsirolimus, Temsirolimus	temsirolimus, cci-779, torisel, bendamustine	1	NCT01170052	Phase 1	Phase 1	Compound id 1039526 - TEMSIROLIMUS,Compound id 1410893 - BENDAMUSTINE
